# Supplementary material
Source: ML conference proceedings conference paper supplement (https://openaccess.thecvf.com/content/WACV2022/html/Li_Single_Image_Deraining_WACV_2022_paper.html)
Supplement: Supplementary file 1 [file Li_Single_Image_Deraining_WACV_2022_supplemental.pdf]

# Single Image Deraining Network with Rain Embedding Consistency and Layered LSTM

WACV2022 Supplementary Materials

Tokyo Institute of Technology

Yizhou Li, Yusuke Monno, Masatoshi Okutomi

# Experimental results on SPA-Data

- **Dataset: SPA-Data [8] (real-world)**

The quantitative comparison on SPA-Data dataset  
(**Red**: the best result; **Blue**: the second best result).

| Methods | SPANet [8] | RCDNet [6] | ECNet (ours) | ECNet+LL (ours) |
|---------|------------|------------|--------------|-----------------|
| PSNR    | 40.04      | 41.05      | <b>43.62</b> | <b>44.32</b>    |
| SSIM    | 0.984      | 0.985      | <b>0.990</b> | <b>0.991</b>    |

Note: PSNR/SSIM are calculated on Y channel

- Training pairs: 638492
- Testing pairs: 1000



# Qualitative comparison on SPA-Data

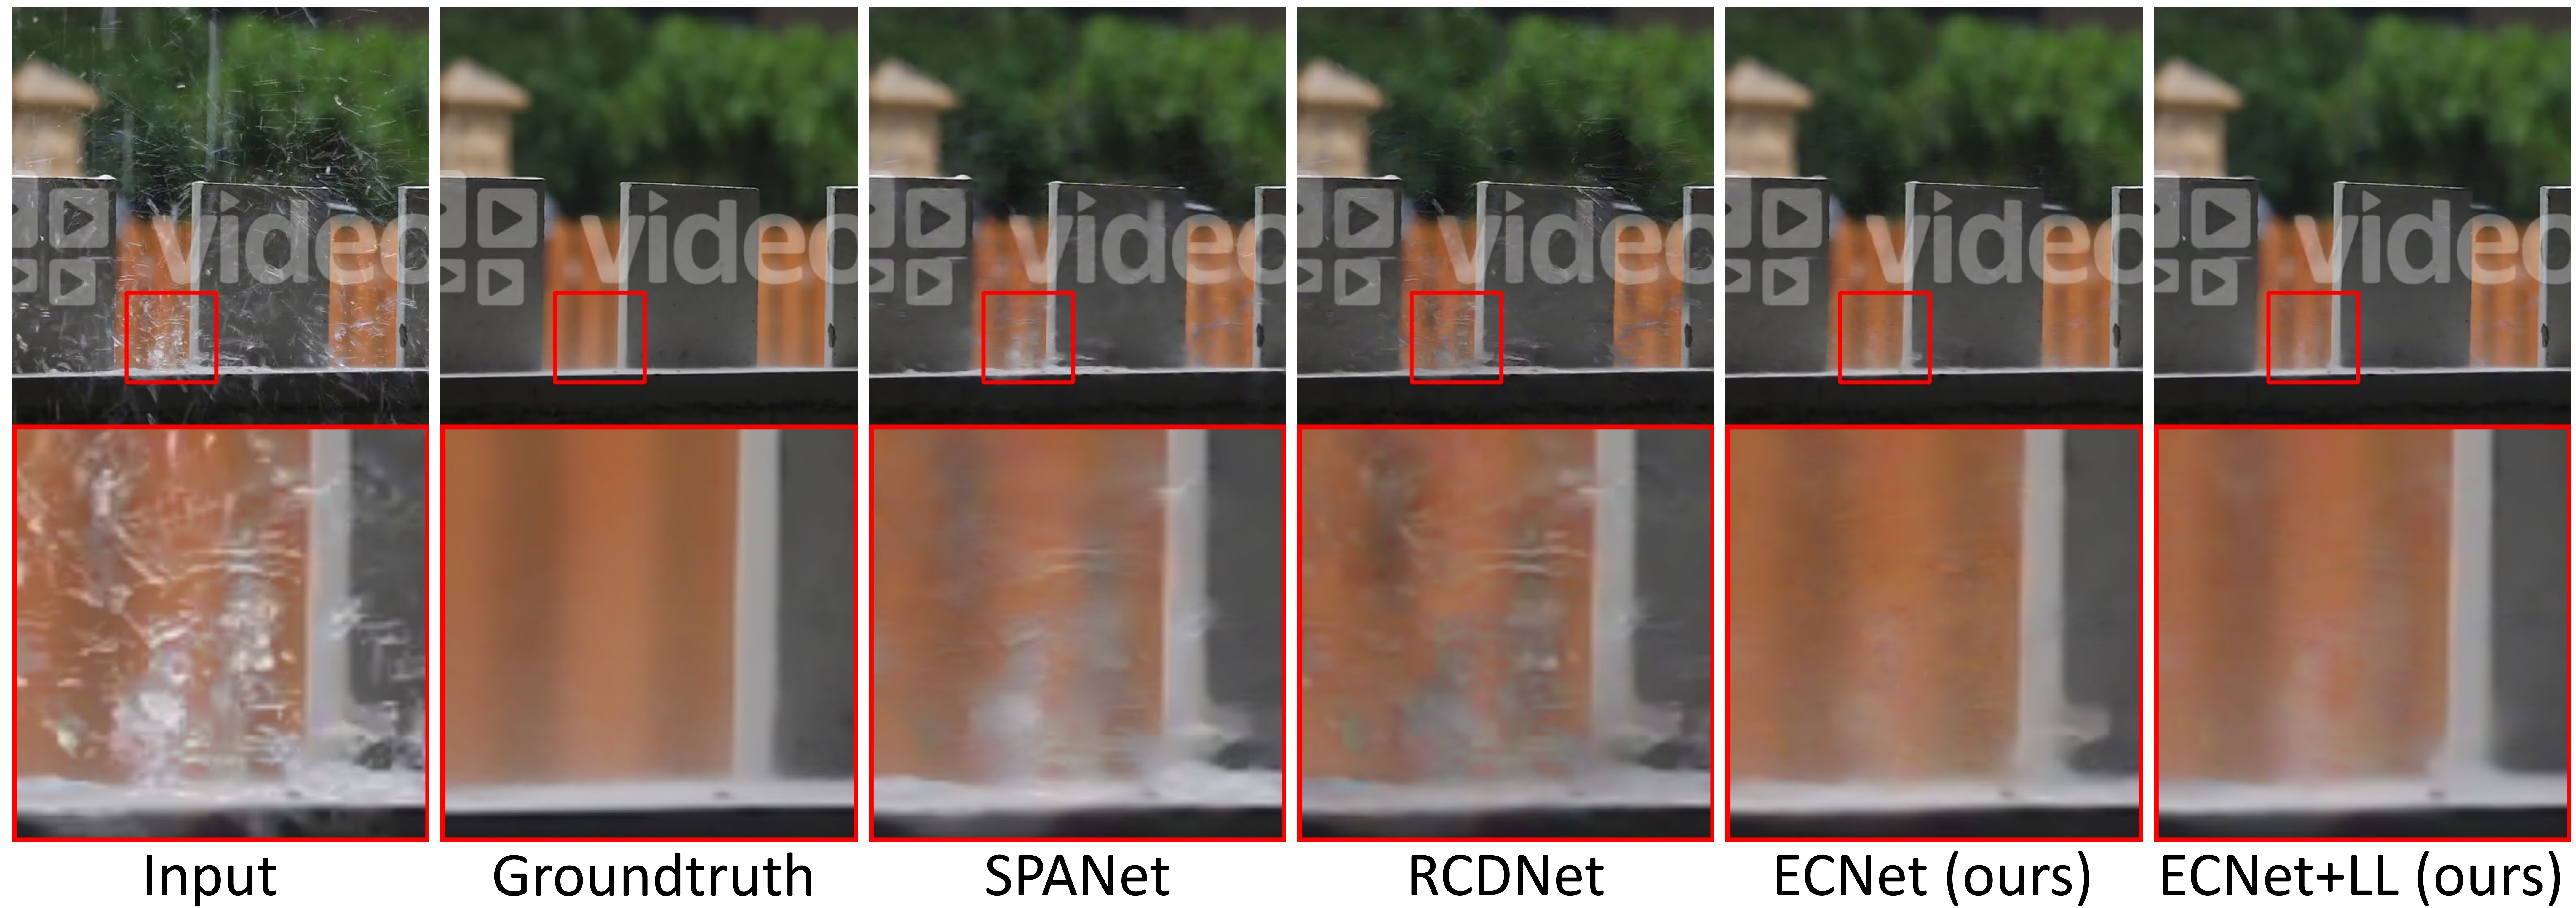



# Qualitative comparison on SPA-Data

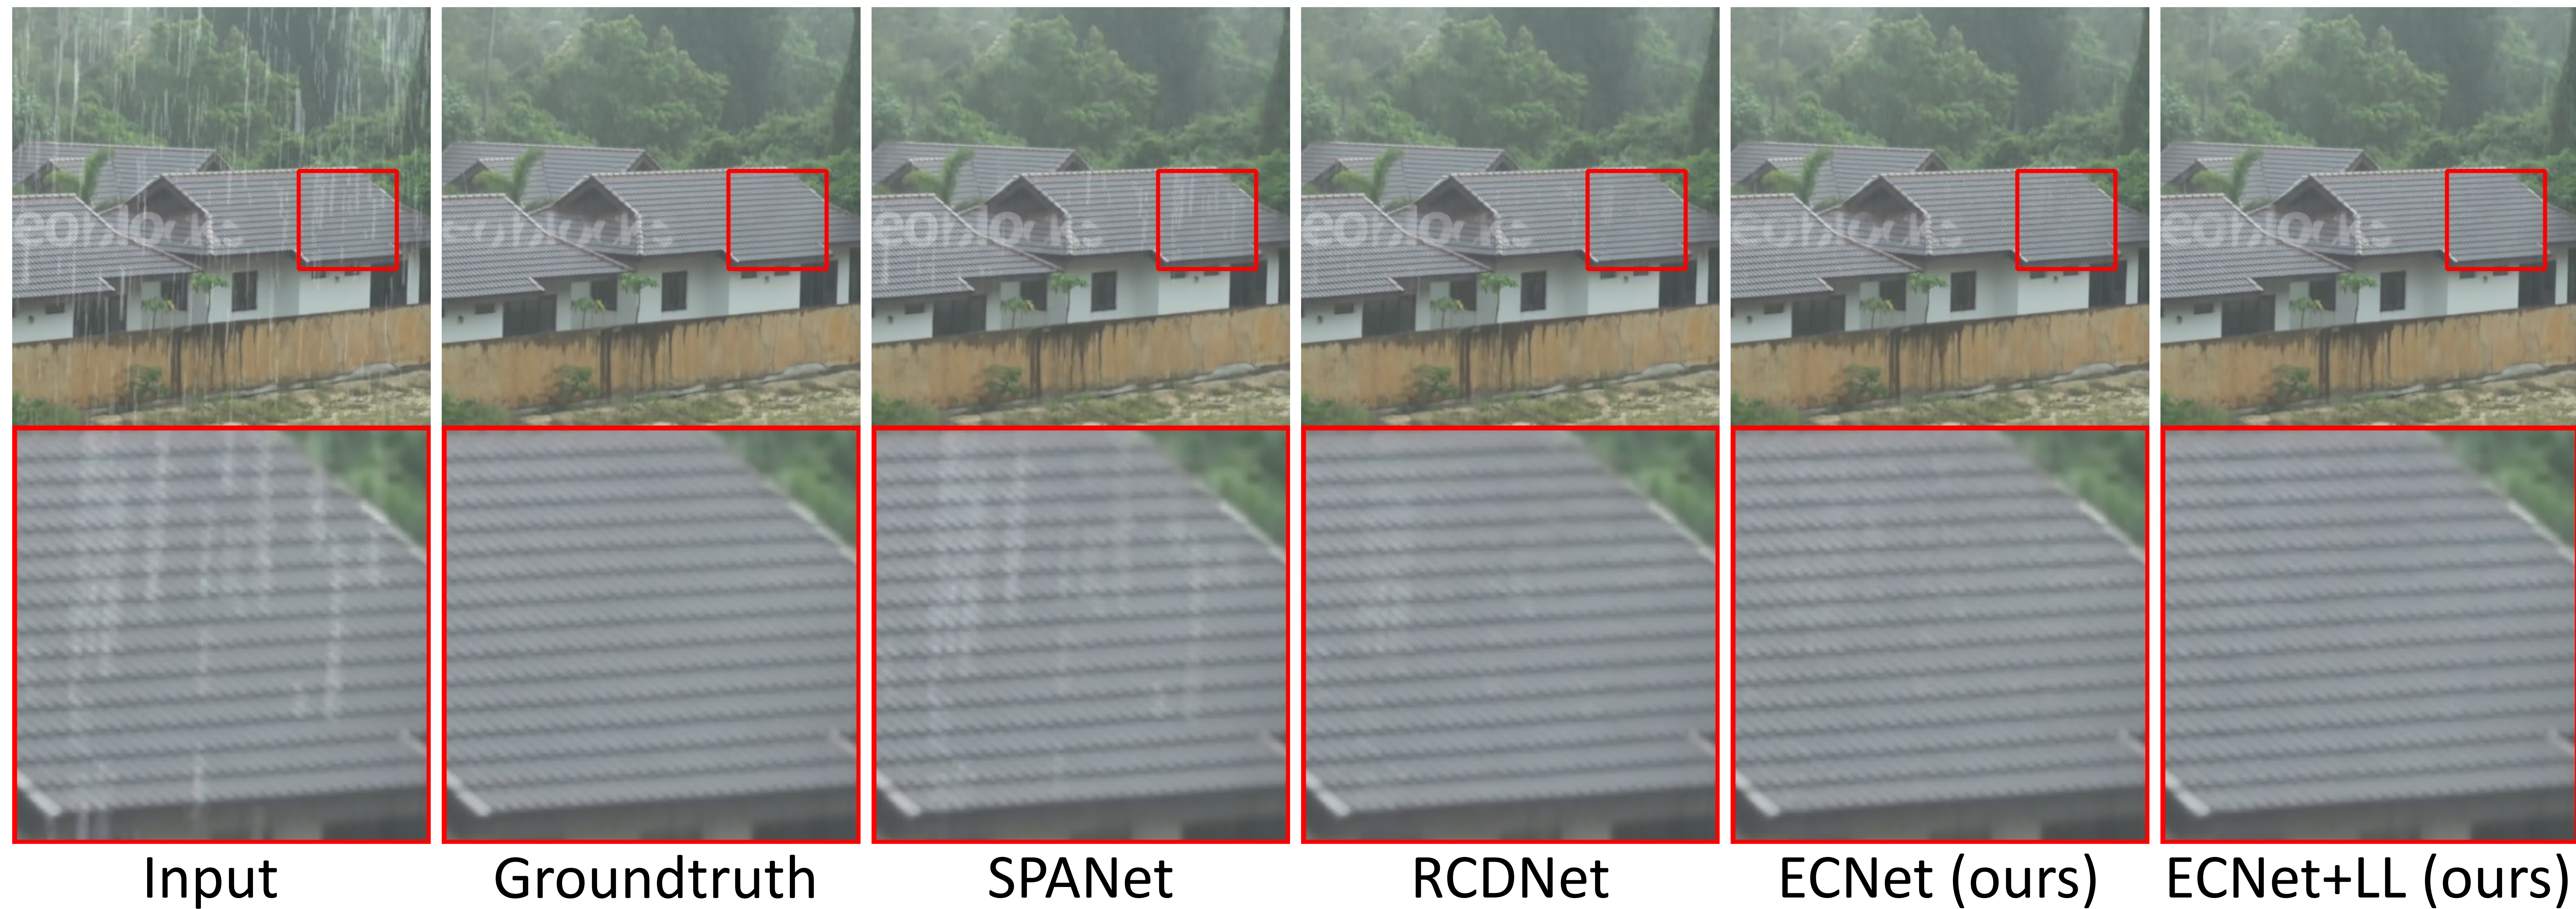



# Qualitative comparison on SPA-Data

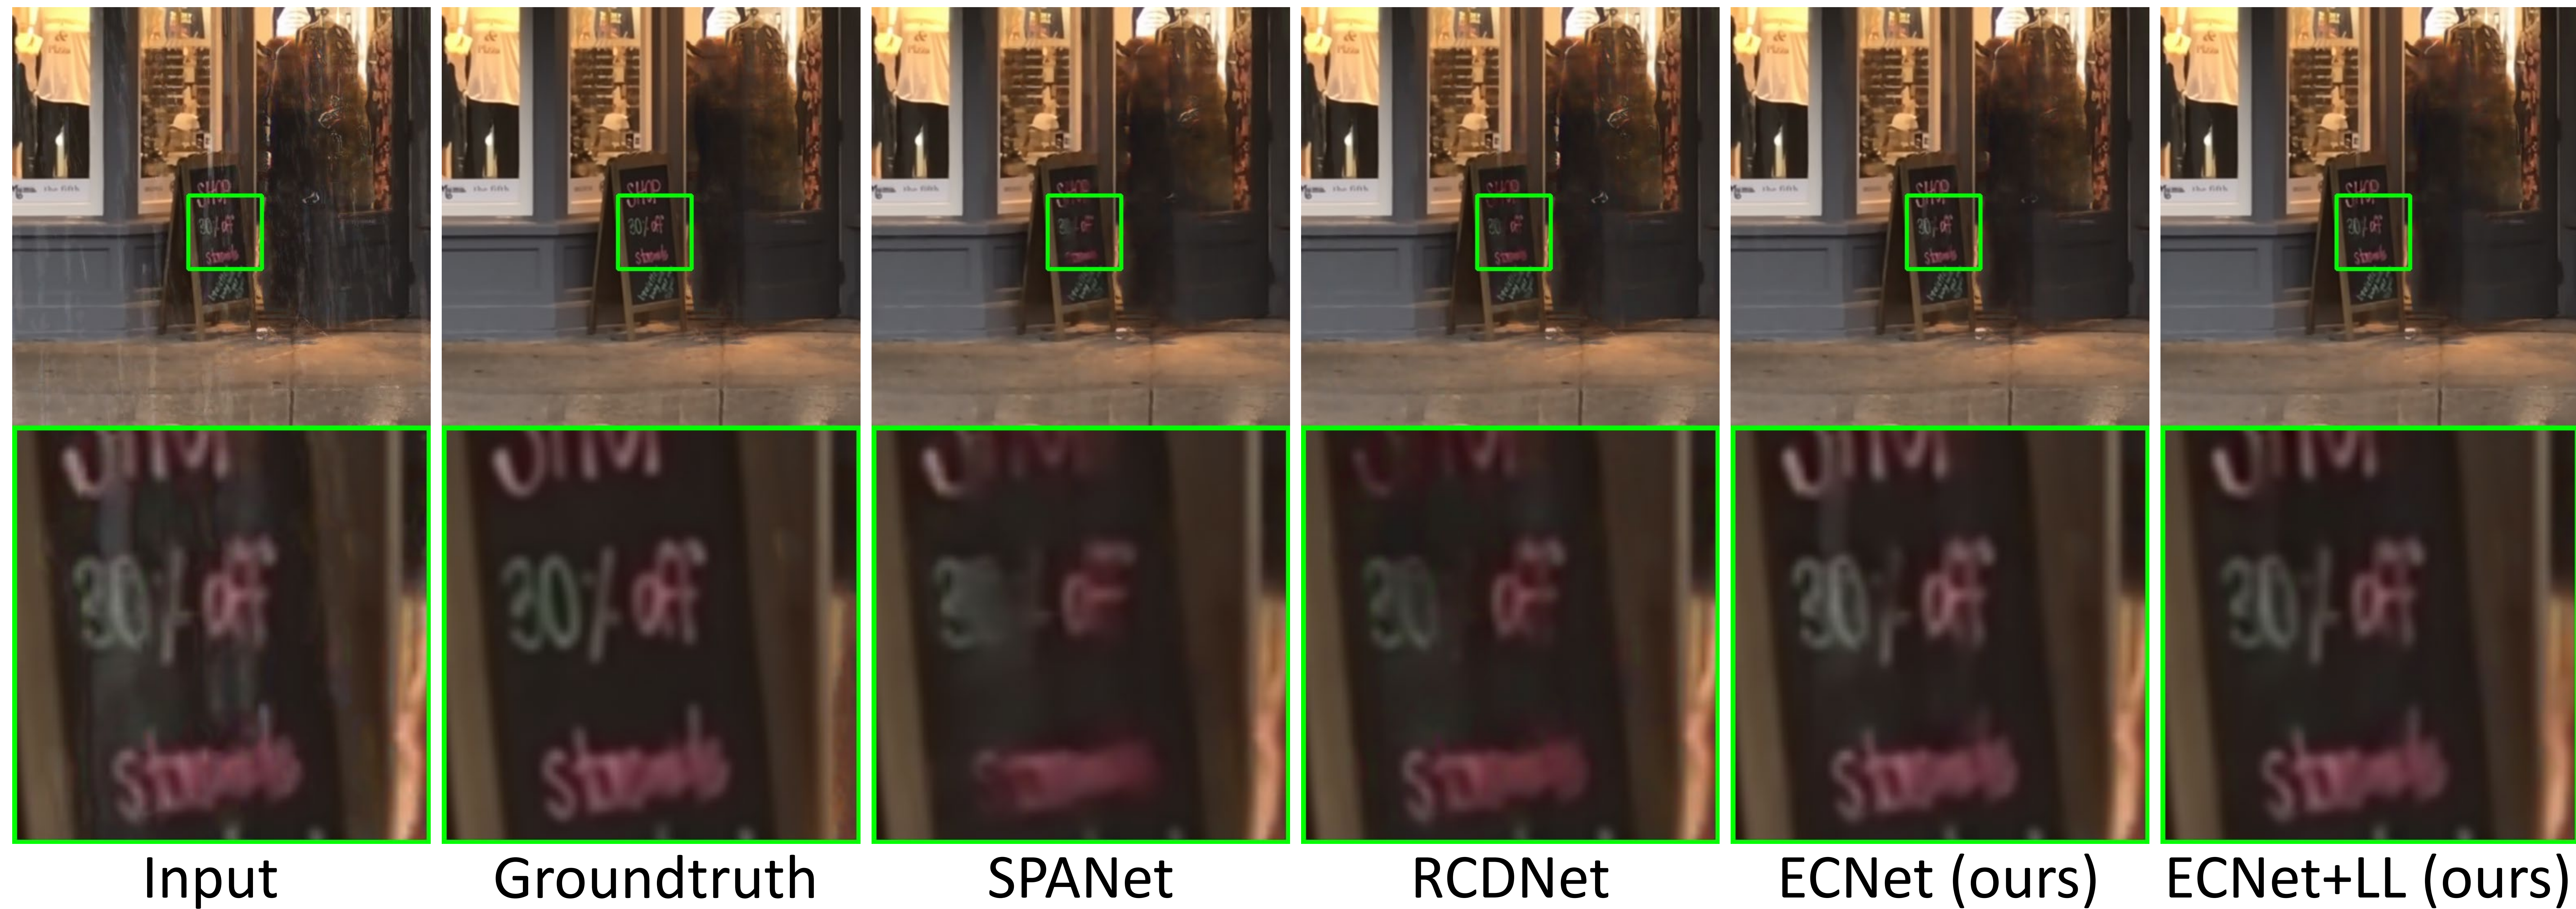



# Qualitative comparison on SPA-Data

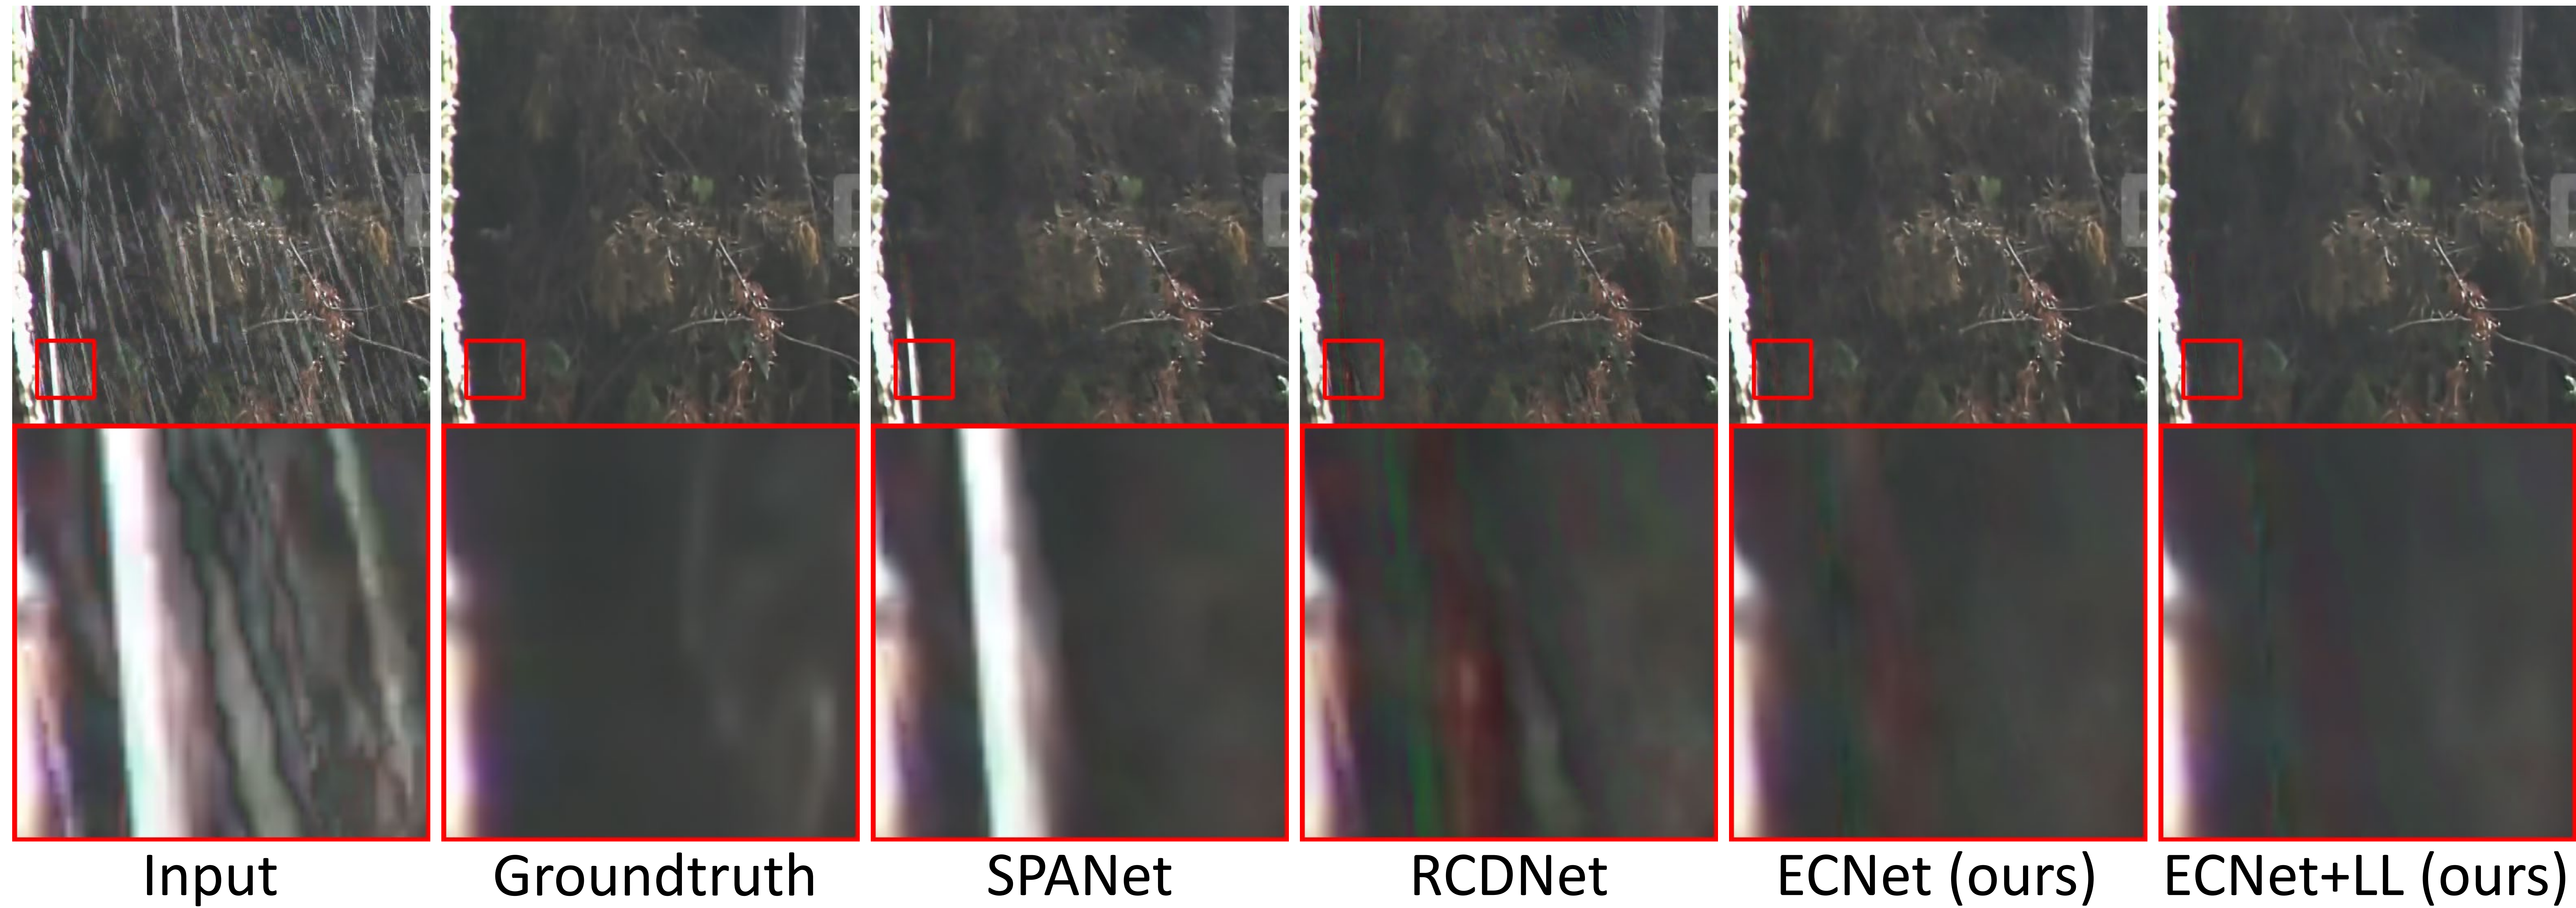



# Qualitative comparison on SPA-Data

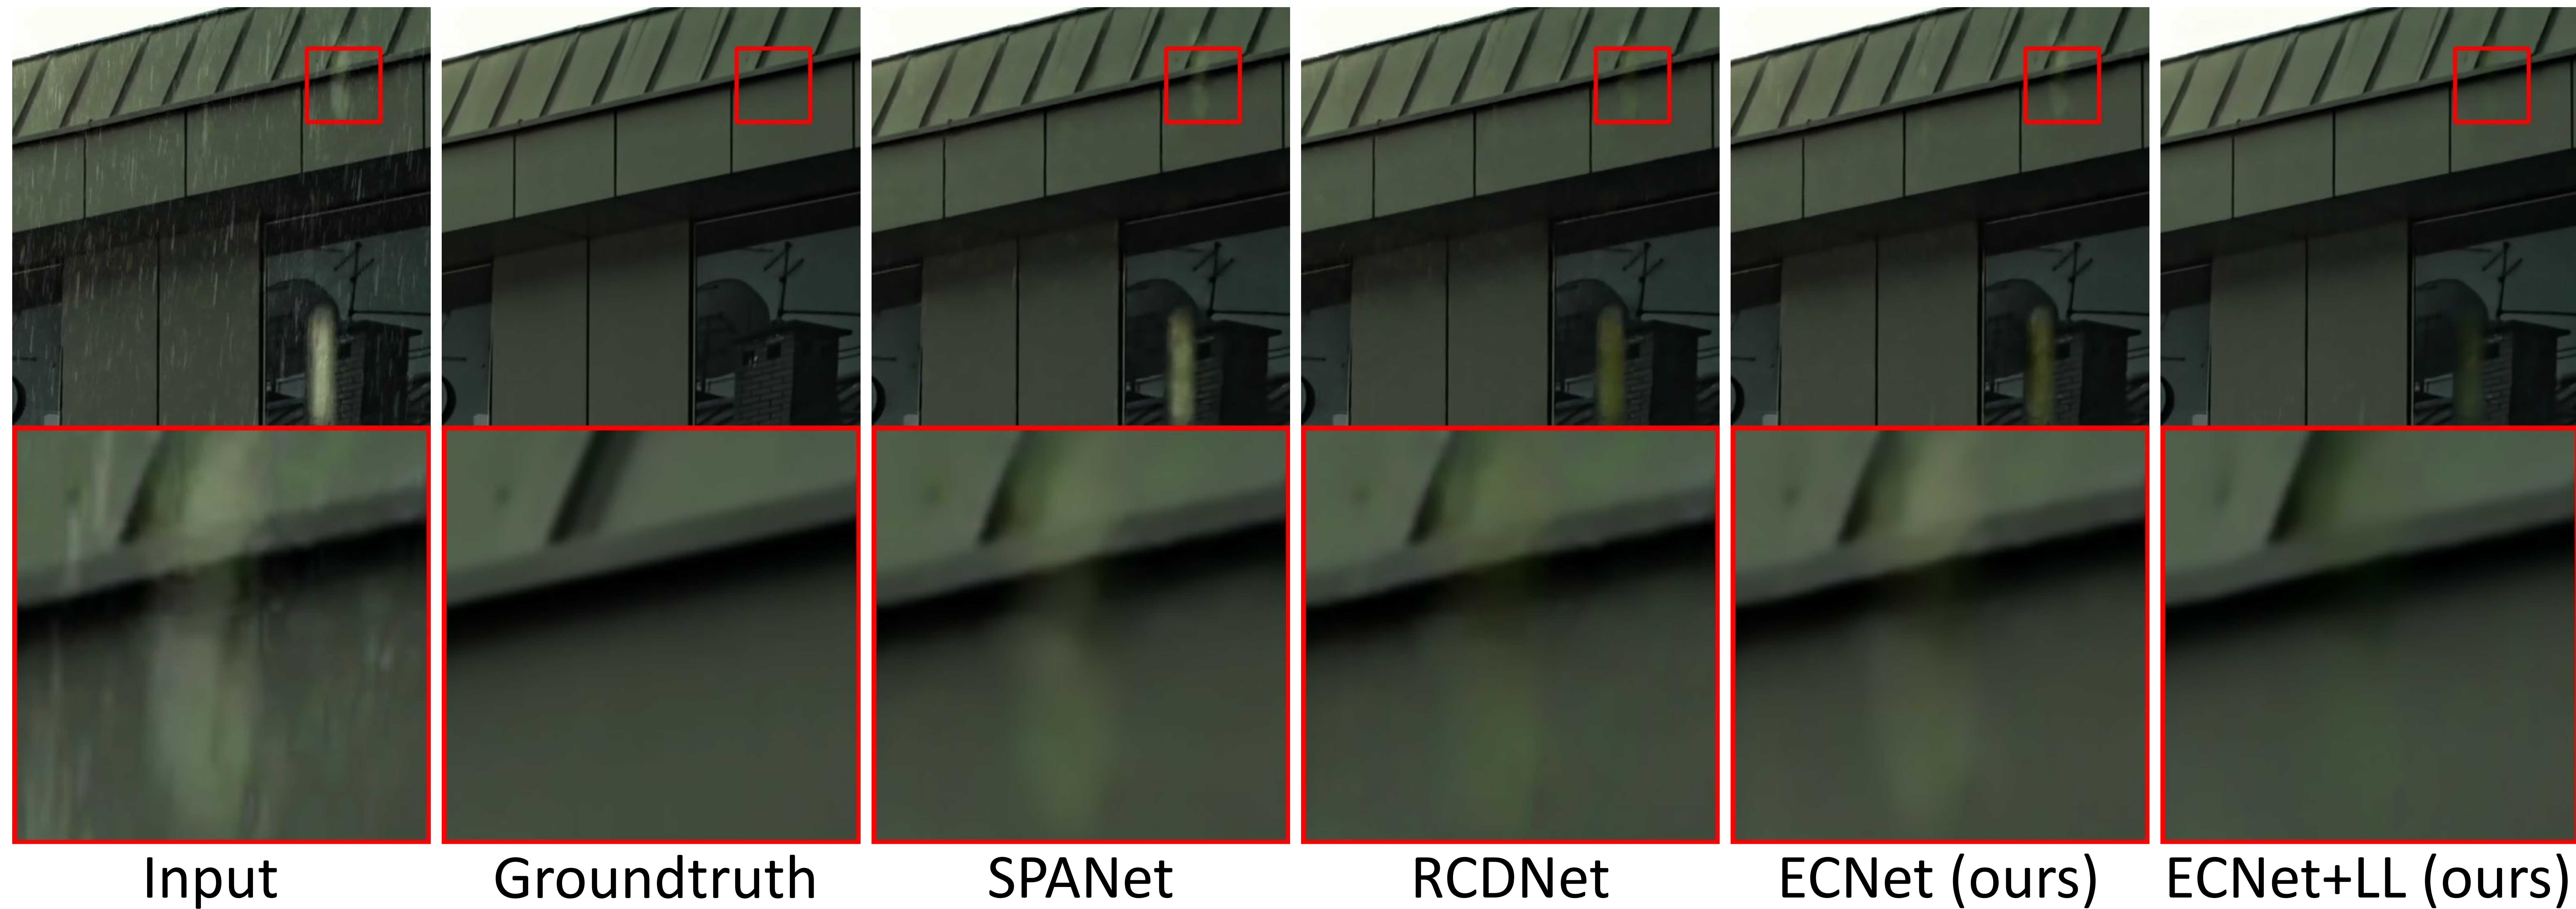



# Qualitative comparison on SPA-Data

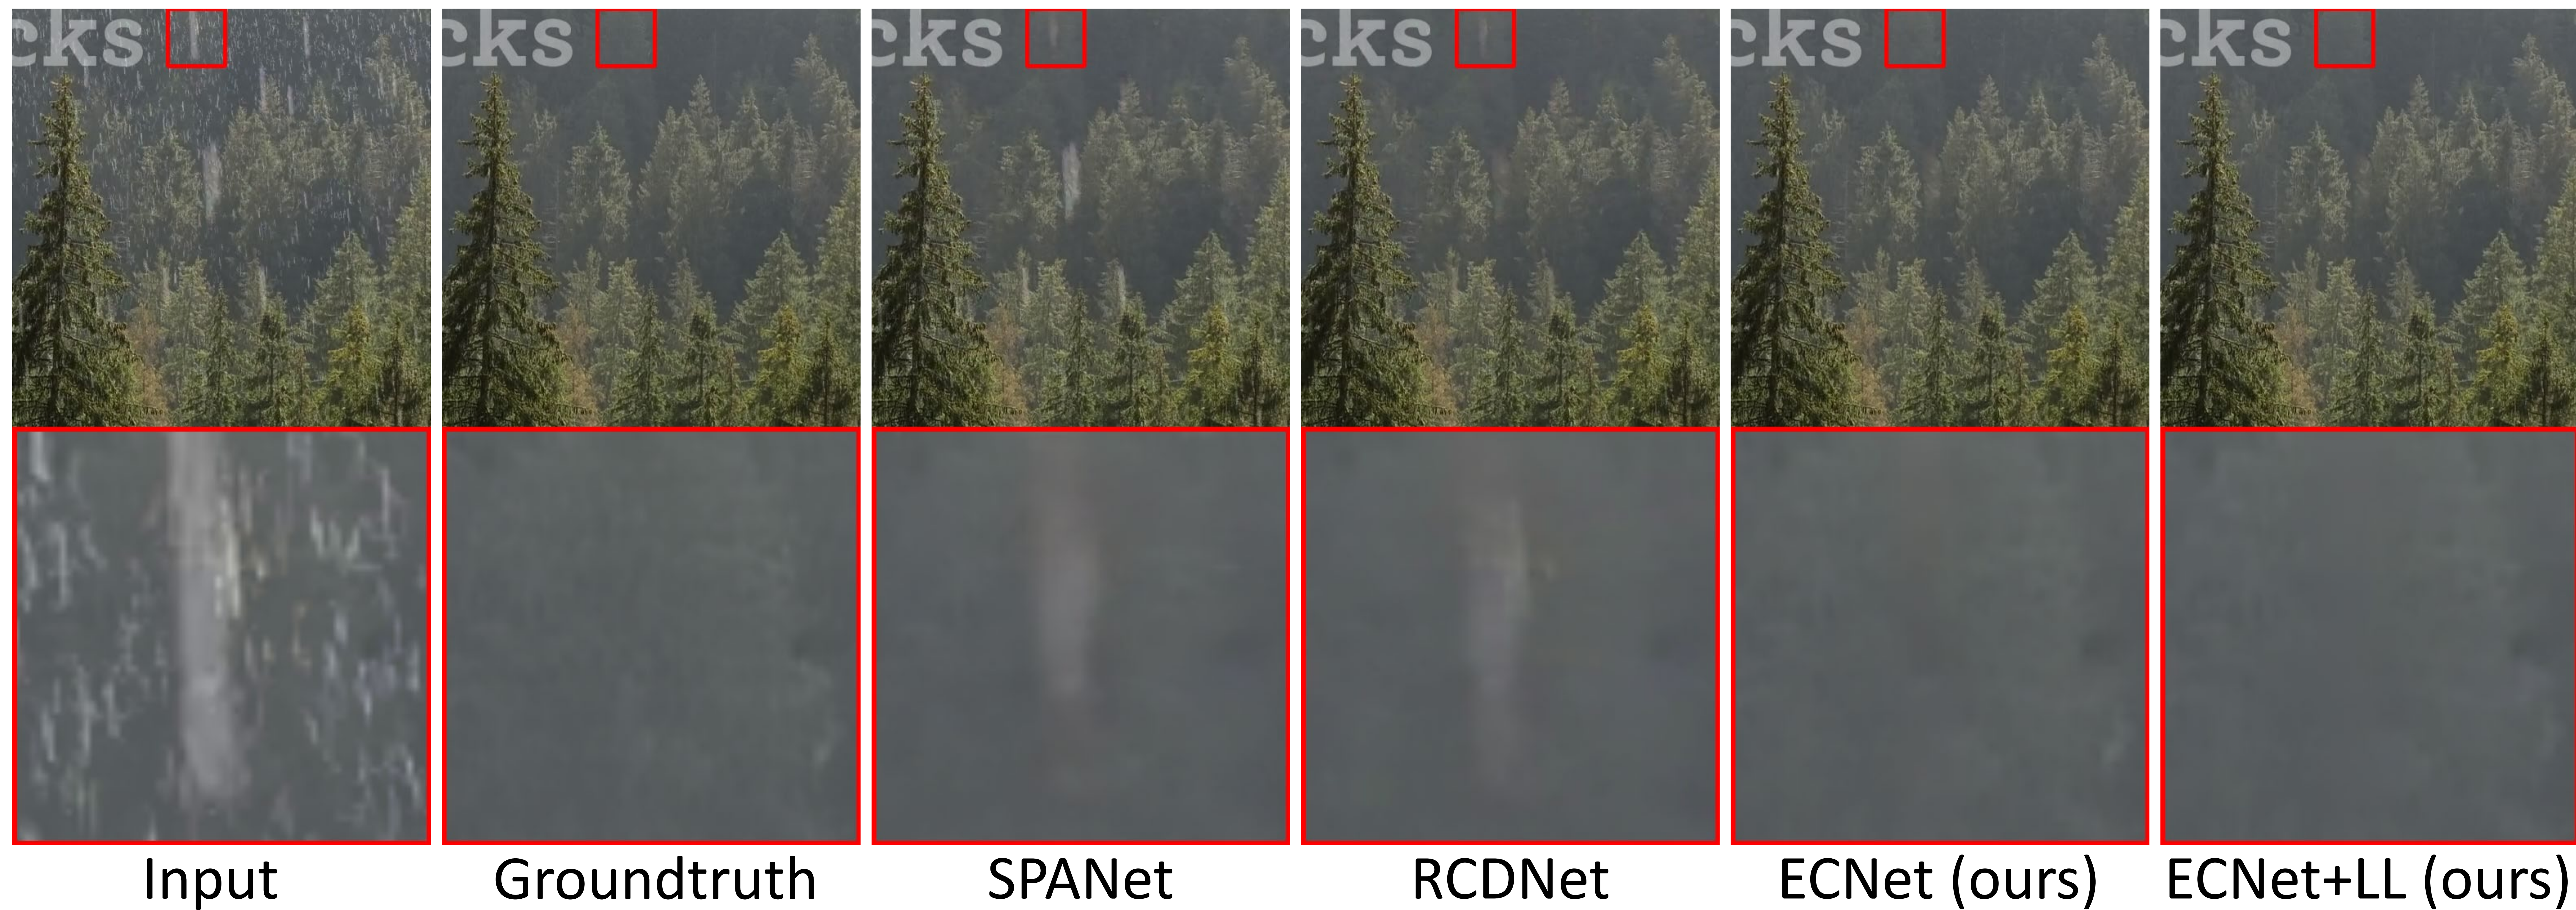



# Qualitative comparison on SPA-Data

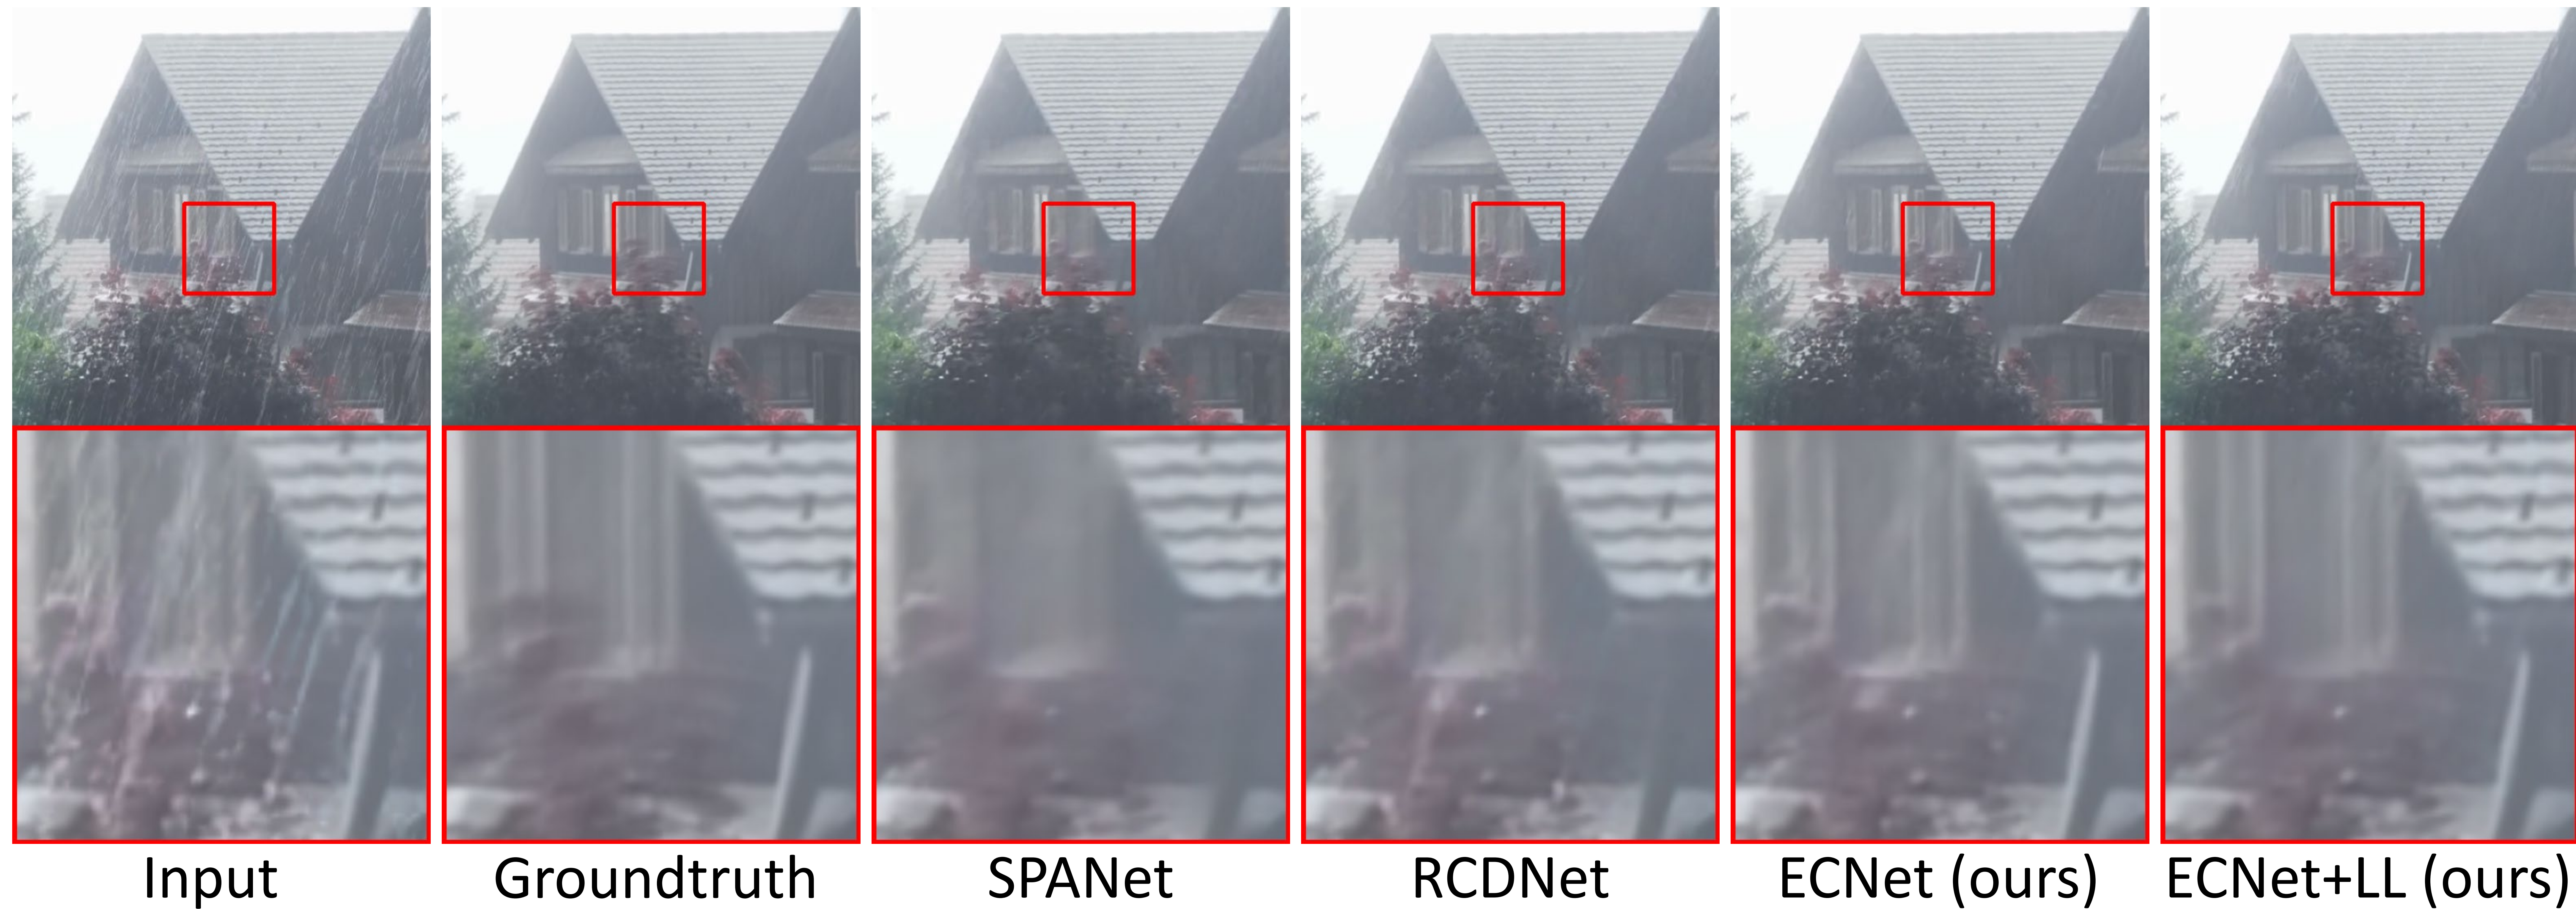



# Experimental results on Rain100H

- **Dataset: Rain100H [7]**

The quantitative comparison on Rain100H dataset  
(**Red**: the best result; **Blue**: the second best result).

| Methods | SIRR<br>[1] | RESCAN<br>[2] | PReNet<br>[3] | JORDER-E<br>[4] | RCDNet<br>[5] | BRN<br>[6]   | ECNet<br>(ours) | ECNet+LL<br>(ours) |
|---------|-------------|---------------|---------------|-----------------|---------------|--------------|-----------------|--------------------|
| PSNR    | 22.03       | 28.82         | 30.31         | 30.22           | 31.26         | <b>31.32</b> | 29.80           | <b>31.43</b>       |
| SSIM    | 0.714       | 0.867         | 0.910         | 0.898           | 0.912         | <b>0.924</b> | 0.903           | <b>0.921</b>       |

Note: PSNR/SSIM are calculated on Y channel

- Training pairs: 1800
- Testing pairs: 100



# Qualitative comparison on Rain100H

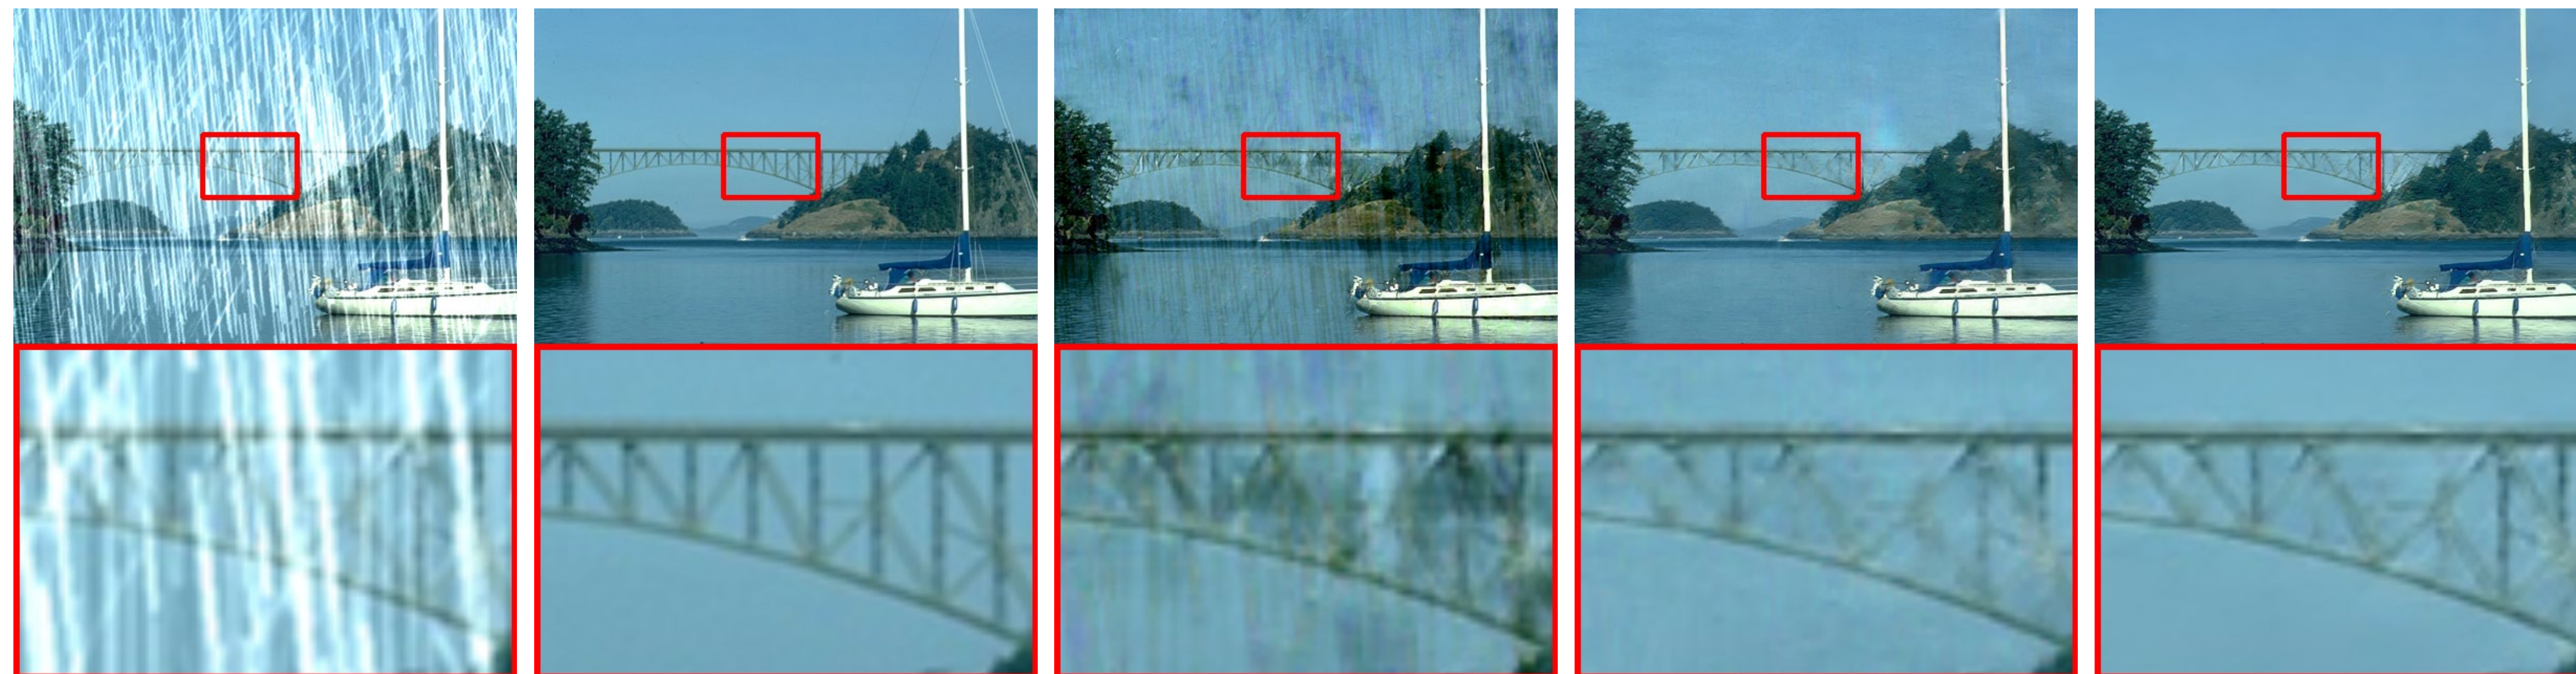

Input

Groundtruth

SIRR

RESCAN

PReNet

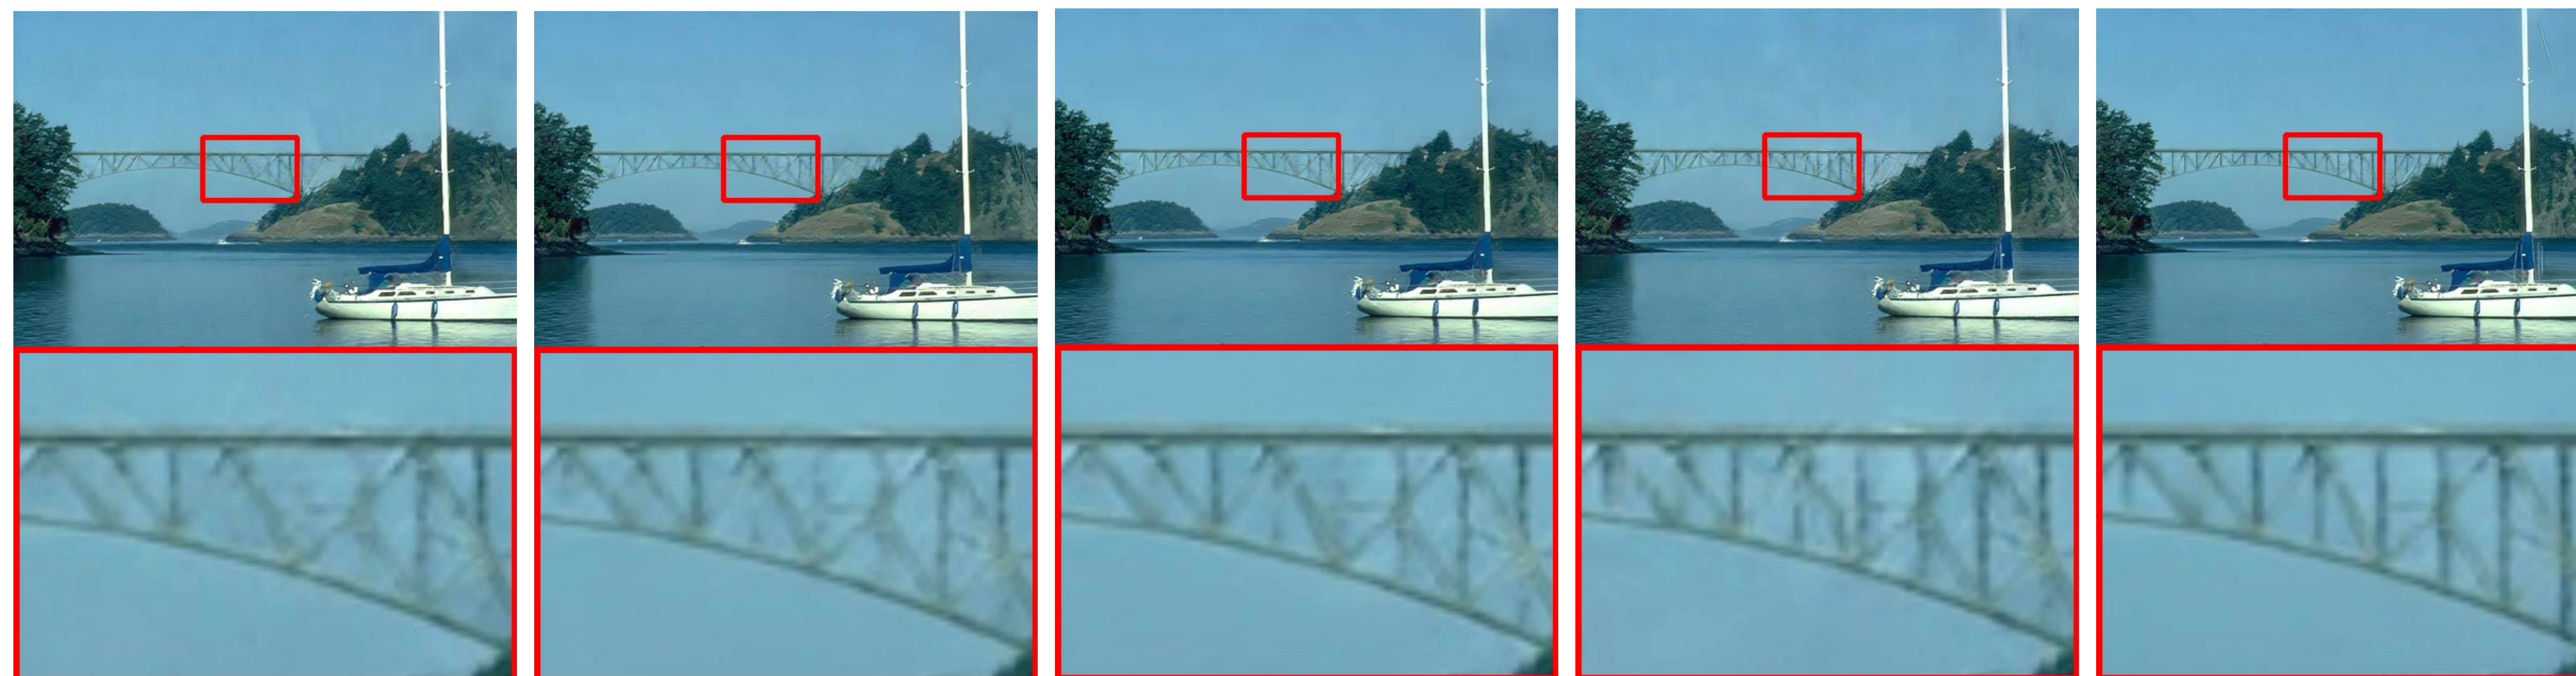

JORDER-E

RCDNet

BRN

ECNet (ours)

ECNet+LL (ours)



# Qualitative comparison on Rain100H

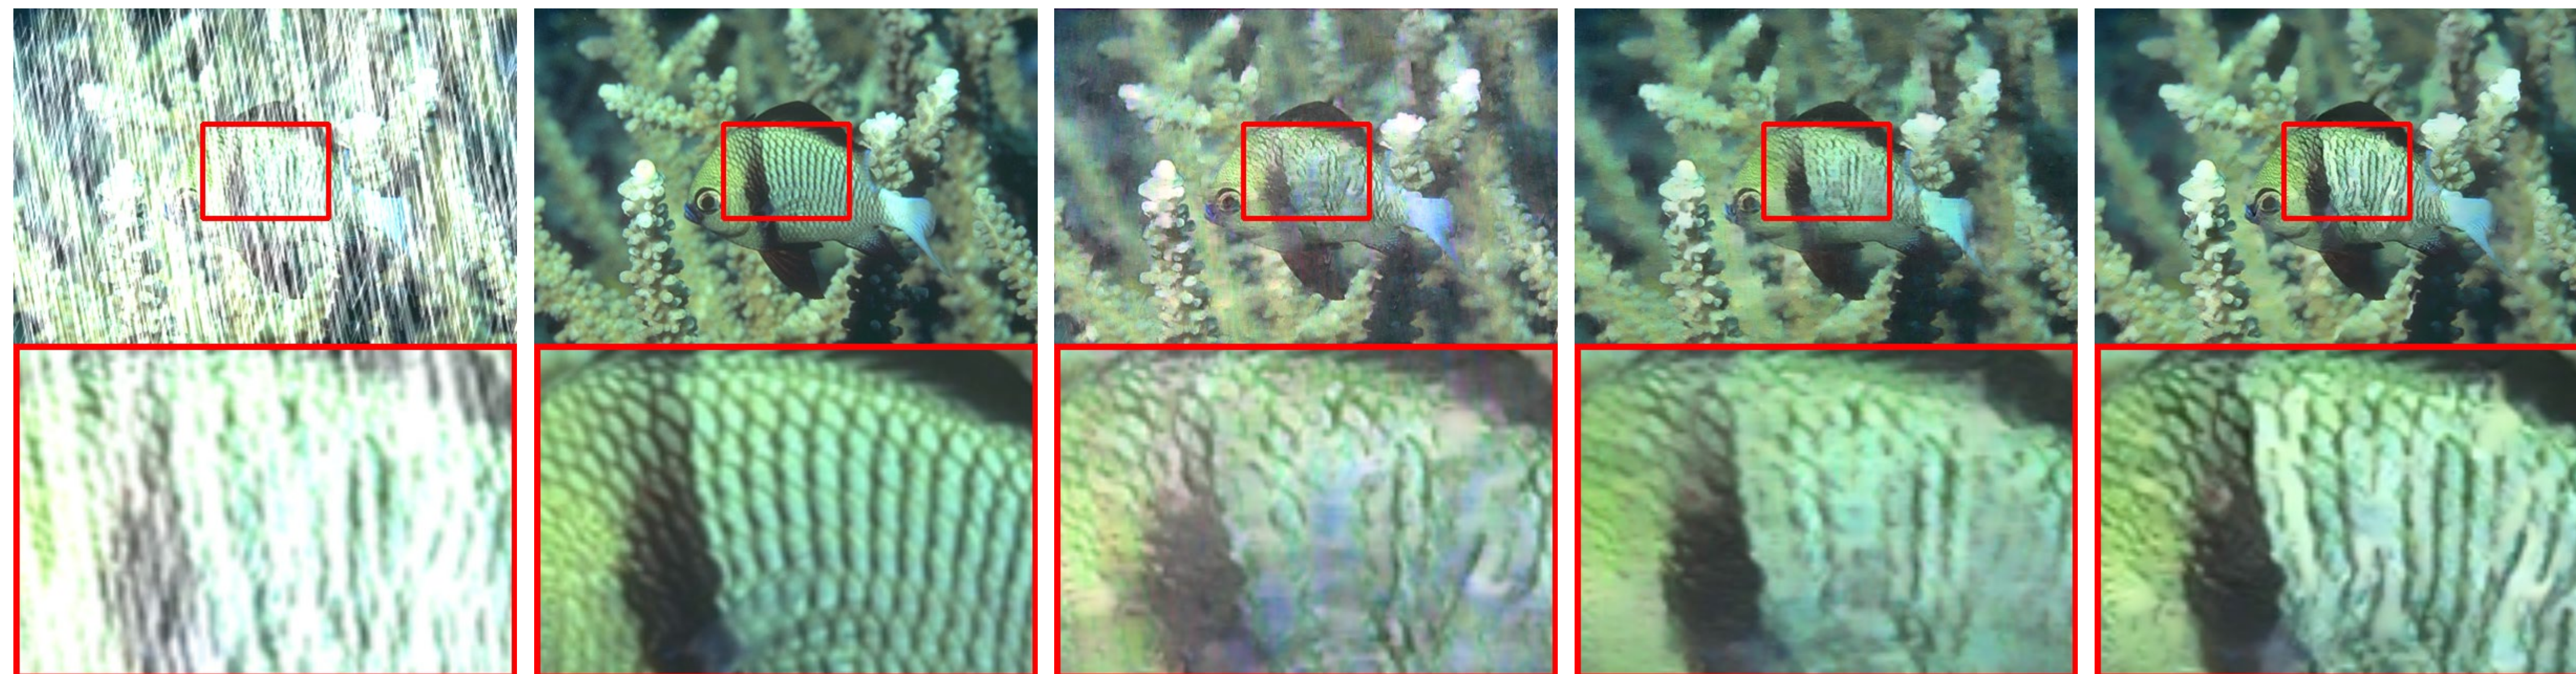

Input

Groundtruth

SIRR

RESCAN

PReNet

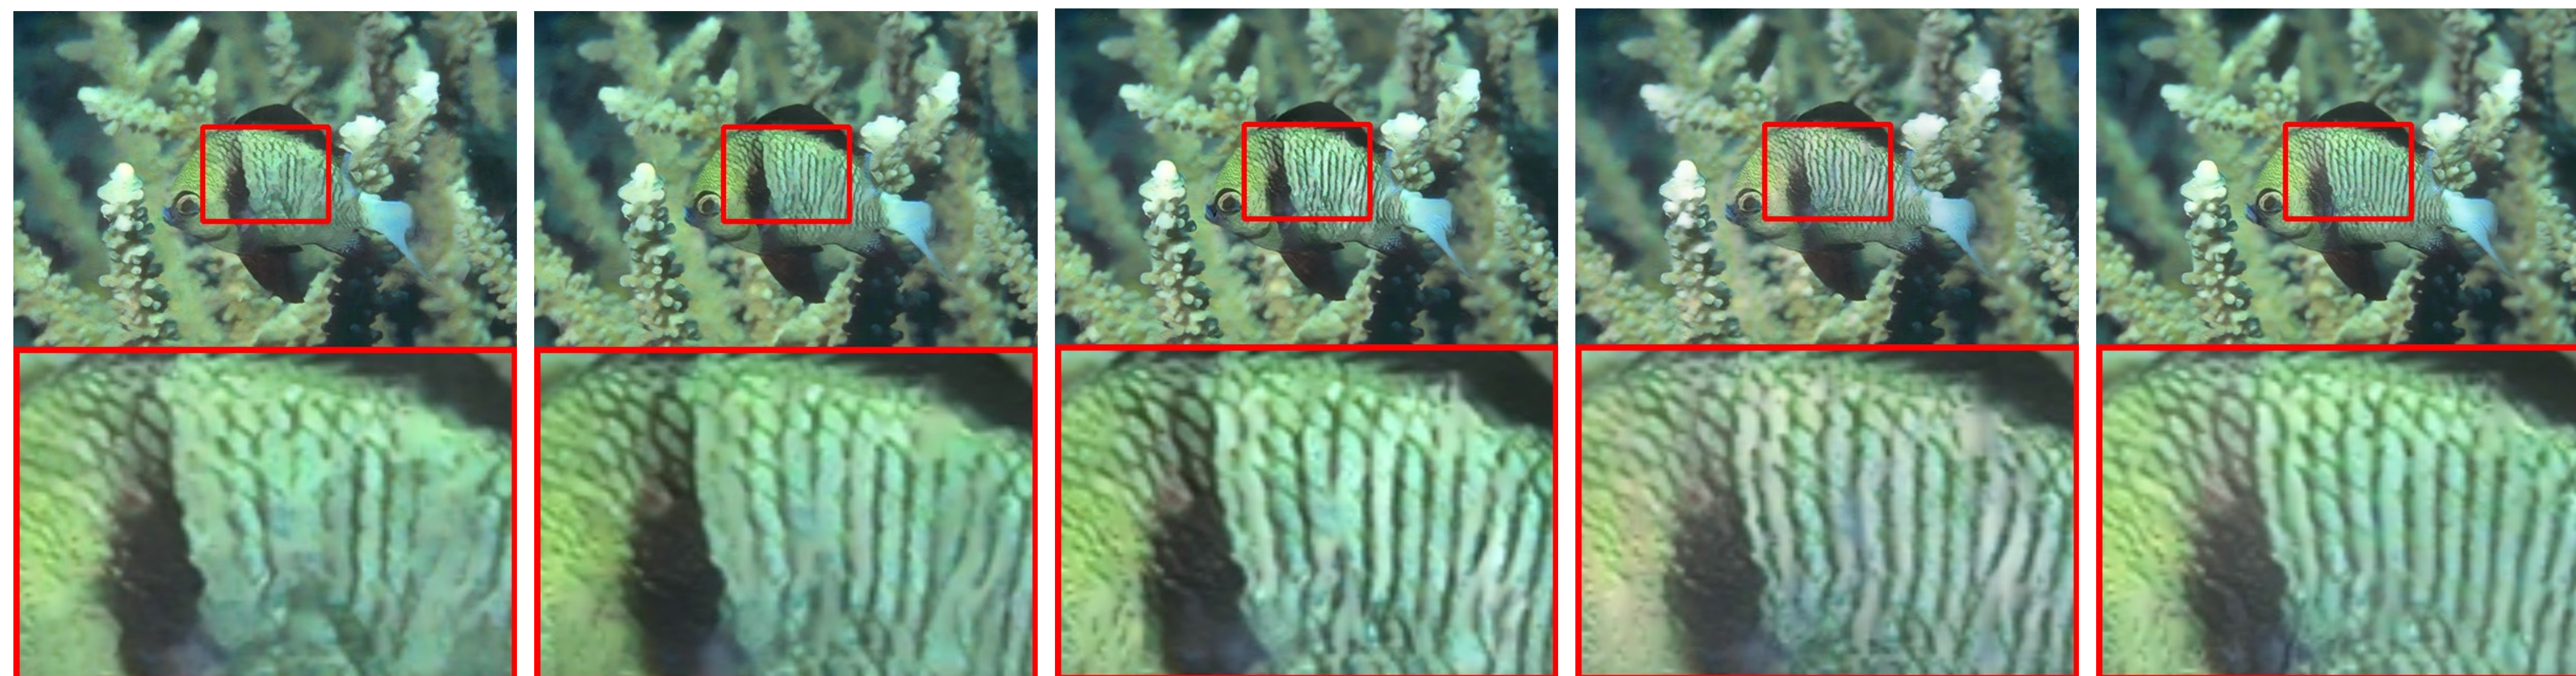

JORDER-E

RCDNet

BRN

ECNet (ours)

ECNet+LL (ours)



# Experimental results on Rain100L

- **Dataset: Rain100L [7]**

The quantitative comparison on Rain100L dataset  
(**Red**: the best result; **Blue**: the second best result).

| Methods | SIRR<br>[1] | RESCAN<br>[2] | PReNet<br>[3] | JORDER-E<br>[4] | RCDNet<br>[5] | BRN<br>[6] | ECNet<br>(ours) | ECNet+LL<br>(ours) |
|---------|-------------|---------------|---------------|-----------------|---------------|------------|-----------------|--------------------|
| PSNR    | 32.31       | 38.09         | 37.21         | 39.36           | <b>39.76</b>  | 38.16      | 38.21           | <b>39.66</b>       |
| SSIM    | 0.926       | 0.980         | 0.978         | 0.985           | <b>0.986</b>  | 0.982      | 0.981           | <b>0.986</b>       |

Note: PSNR/SSIM are calculated on Y channel

- Training pairs: 200
- Testing pairs: 100



# Qualitative comparison on Rain100L

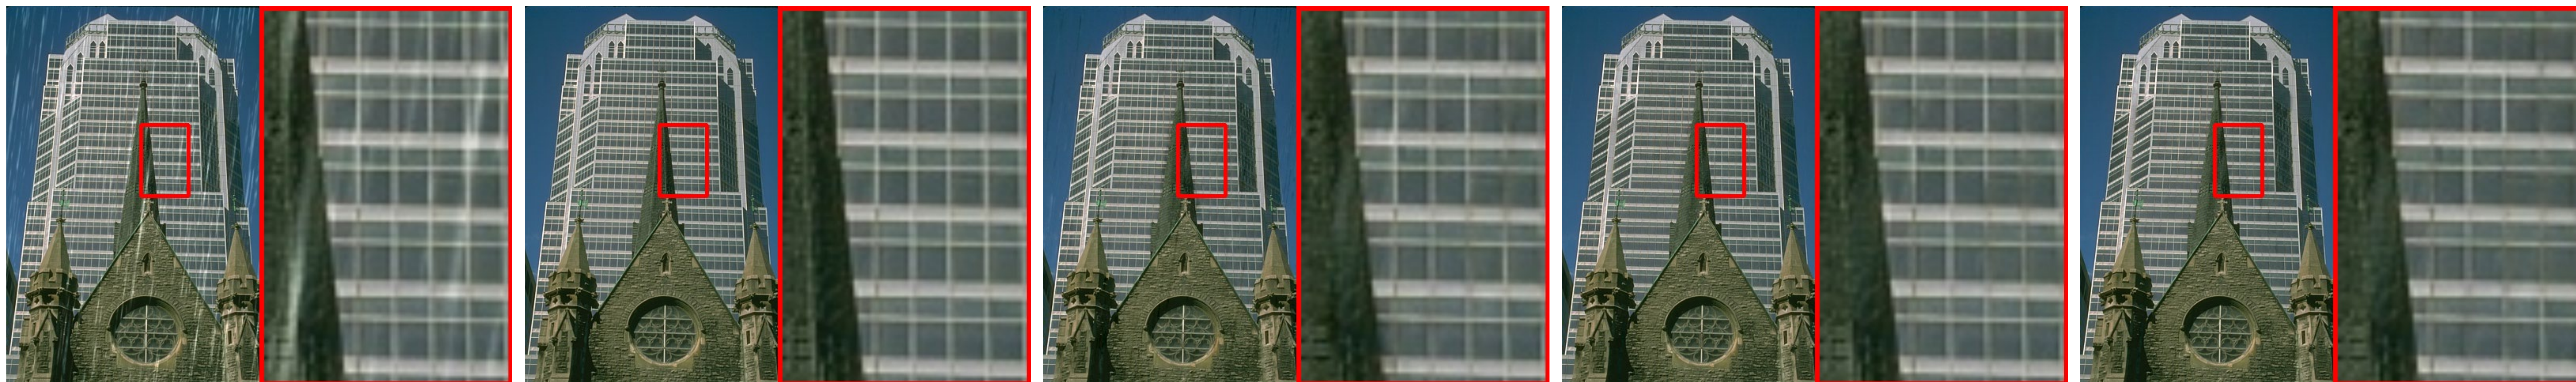

Input

Groundtruth

SIRR

RESCAN

PReNet

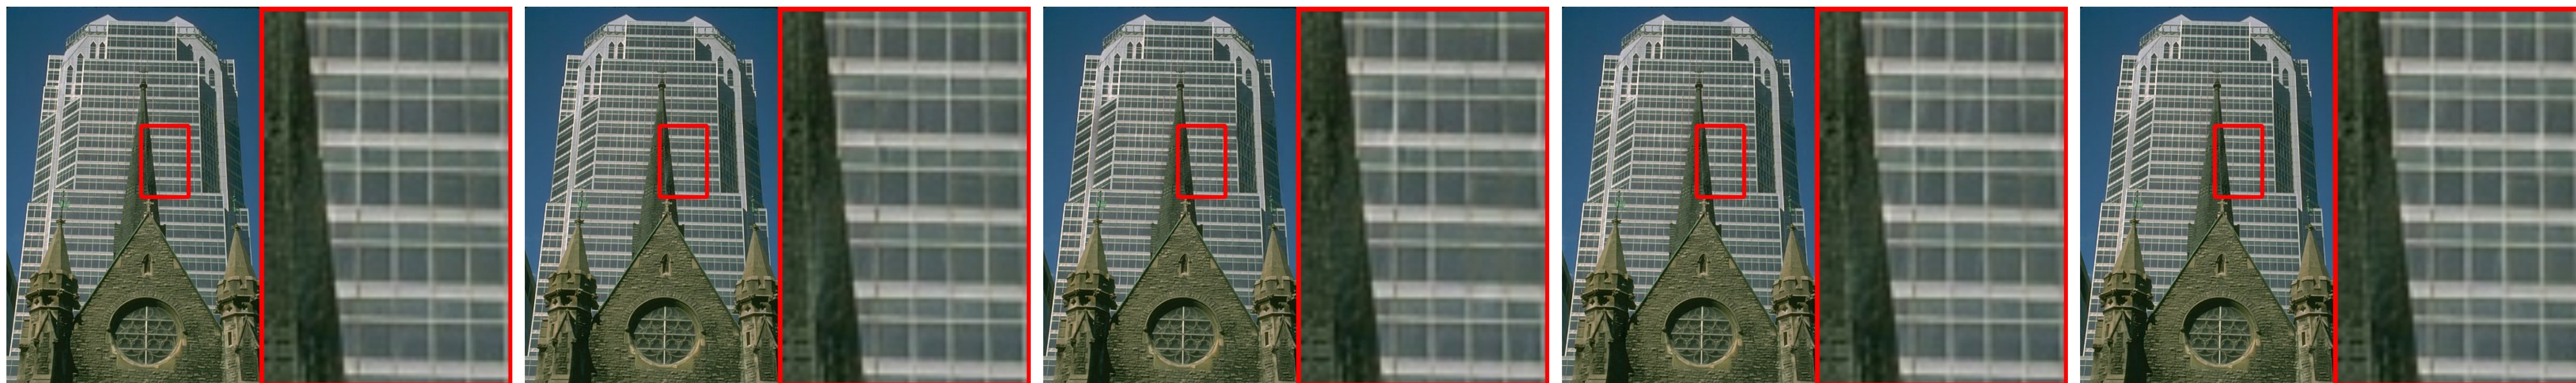

JORDER-E

RCDNet

BRN

ECNet (ours)

ECNet+LL (ours)



# Qualitative comparison on Rain100L

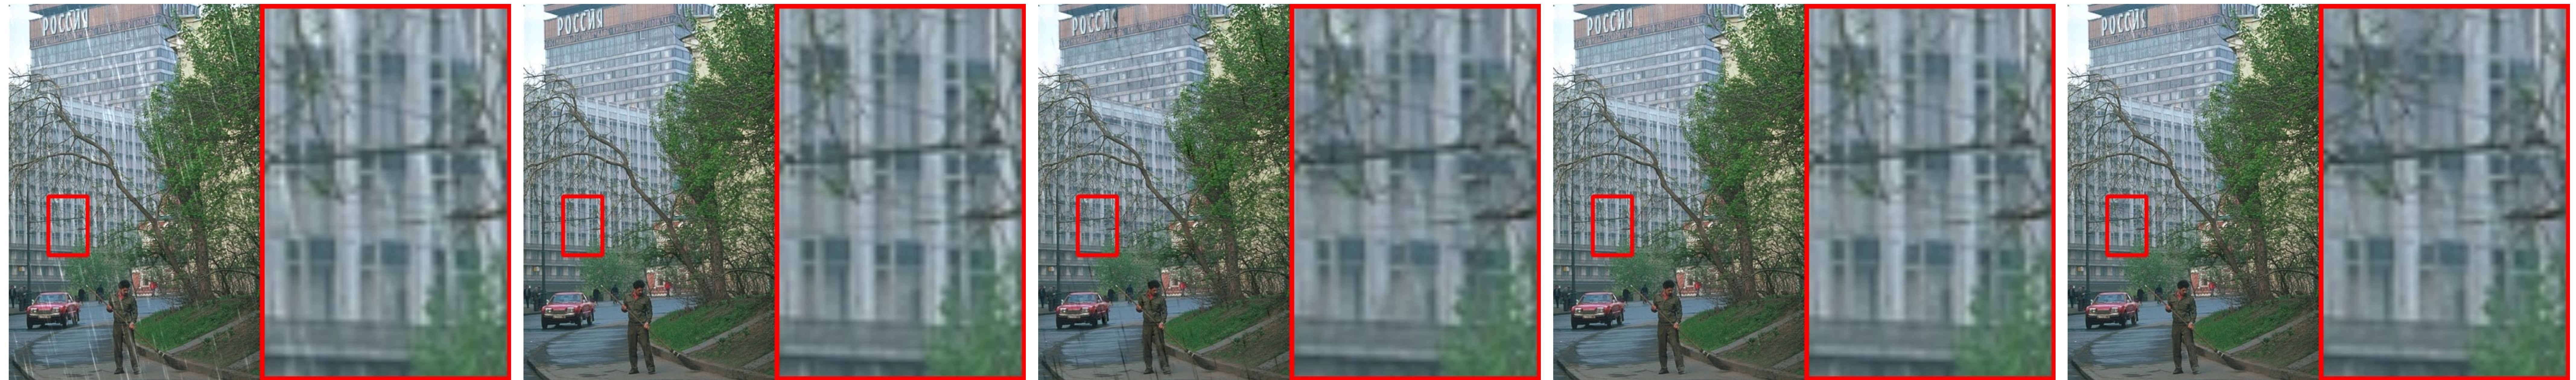

Input

Groundtruth

SIRR

RESCAN

PReNet

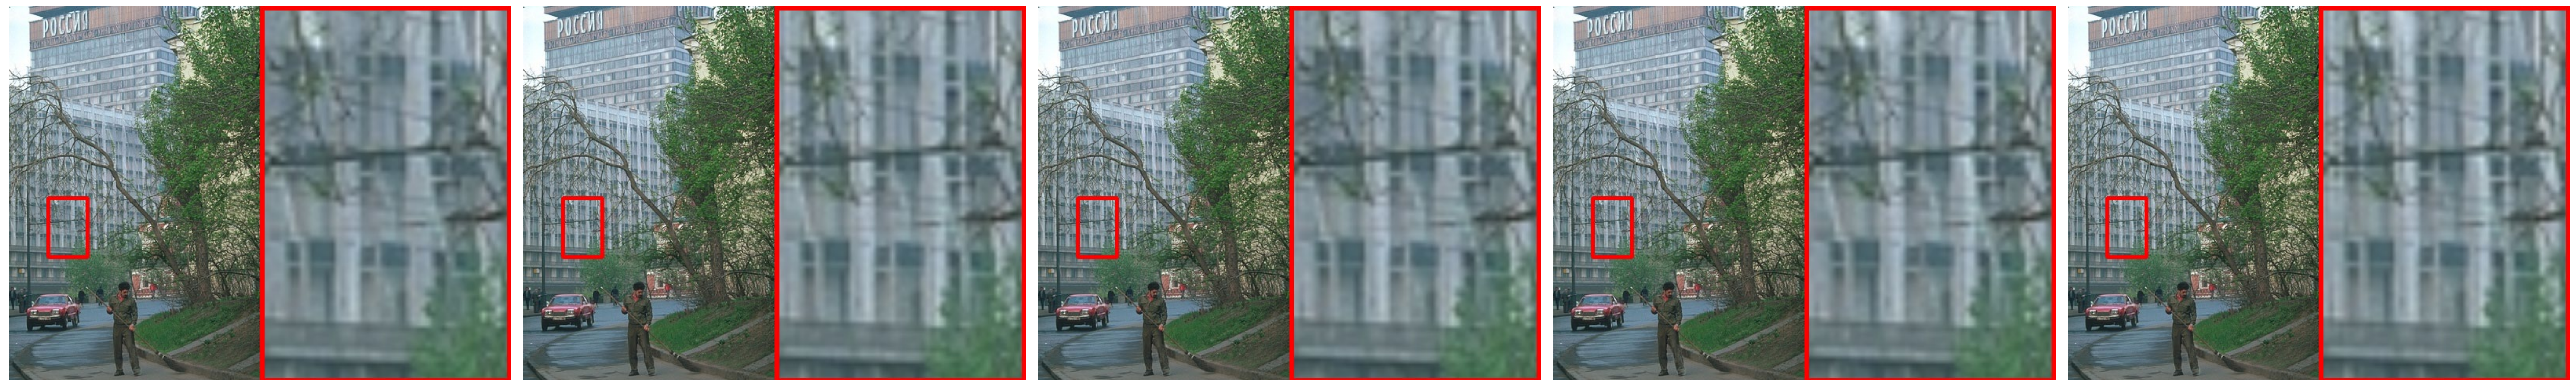

JORDER-E

RCDNet

BRN

ECNet (ours)

ECNet+LL (ours)



# Experimental results on Rain200H

- **Dataset: Rain200H [7]**

The quantitative comparison on Rain200H dataset  
(Red: the best result; Blue: the second best result).

| Methods | SIRR<br>[2] | RESCAN<br>[3] | PReNet<br>[4] | JORDER-E<br>[5] | RCDNet<br>[6] | BRN<br>[7]   | ECNet<br>(ours) | ECNet+LL<br>(ours) |
|---------|-------------|---------------|---------------|-----------------|---------------|--------------|-----------------|--------------------|
| PSNR    | 22.17       | 27.95         | 29.47         | 29.23           | 30.18         | <b>30.27</b> | 28.54           | <b>30.22</b>       |
| SSIM    | 0.726       | 0.862         | 0.907         | 0.894           | 0.909         | <b>0.919</b> | 0.893           | <b>0.912</b>       |

Note: PSNR/SSIM are calculated on Y channel

- Training pairs: 1800 (Models trained on Rain100H are used)
- Testing pairs: 200



# Qualitative comparison on Rain200H

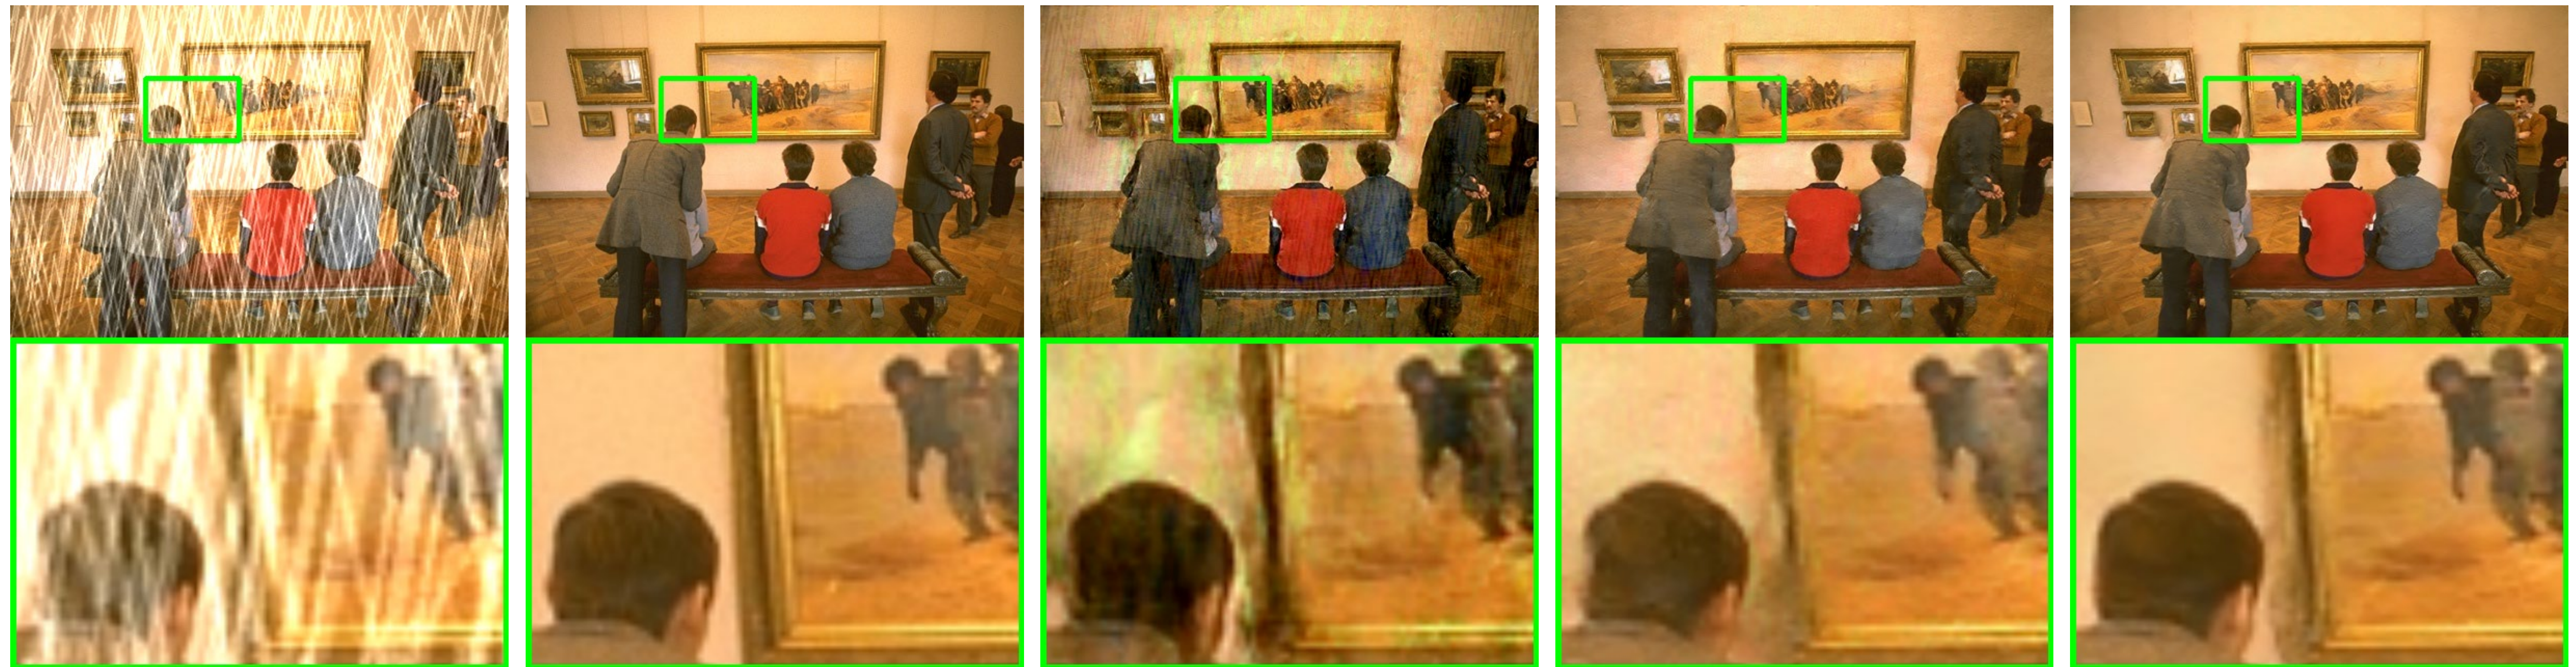

Input

Groundtruth

SIRR

RESCAN

PReNet

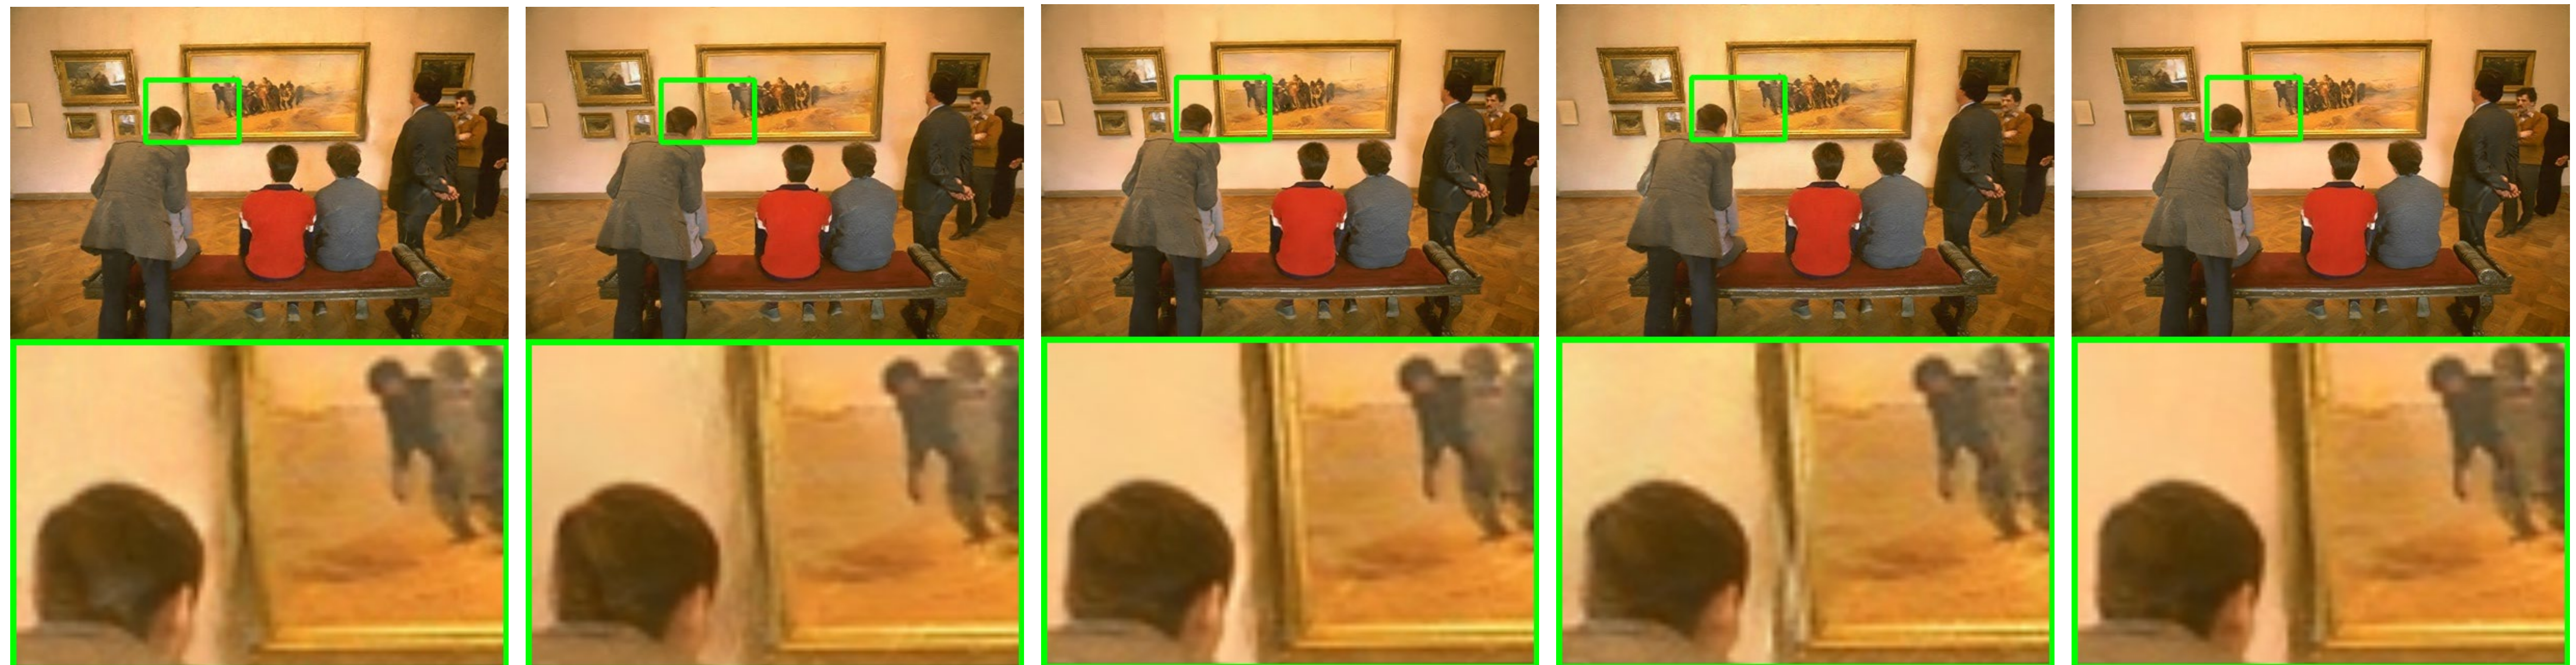

JORDER-E

RCDNet

BRN

ECNet (ours)

ECNet+LL (ours)



# Qualitative comparison on Rain200H

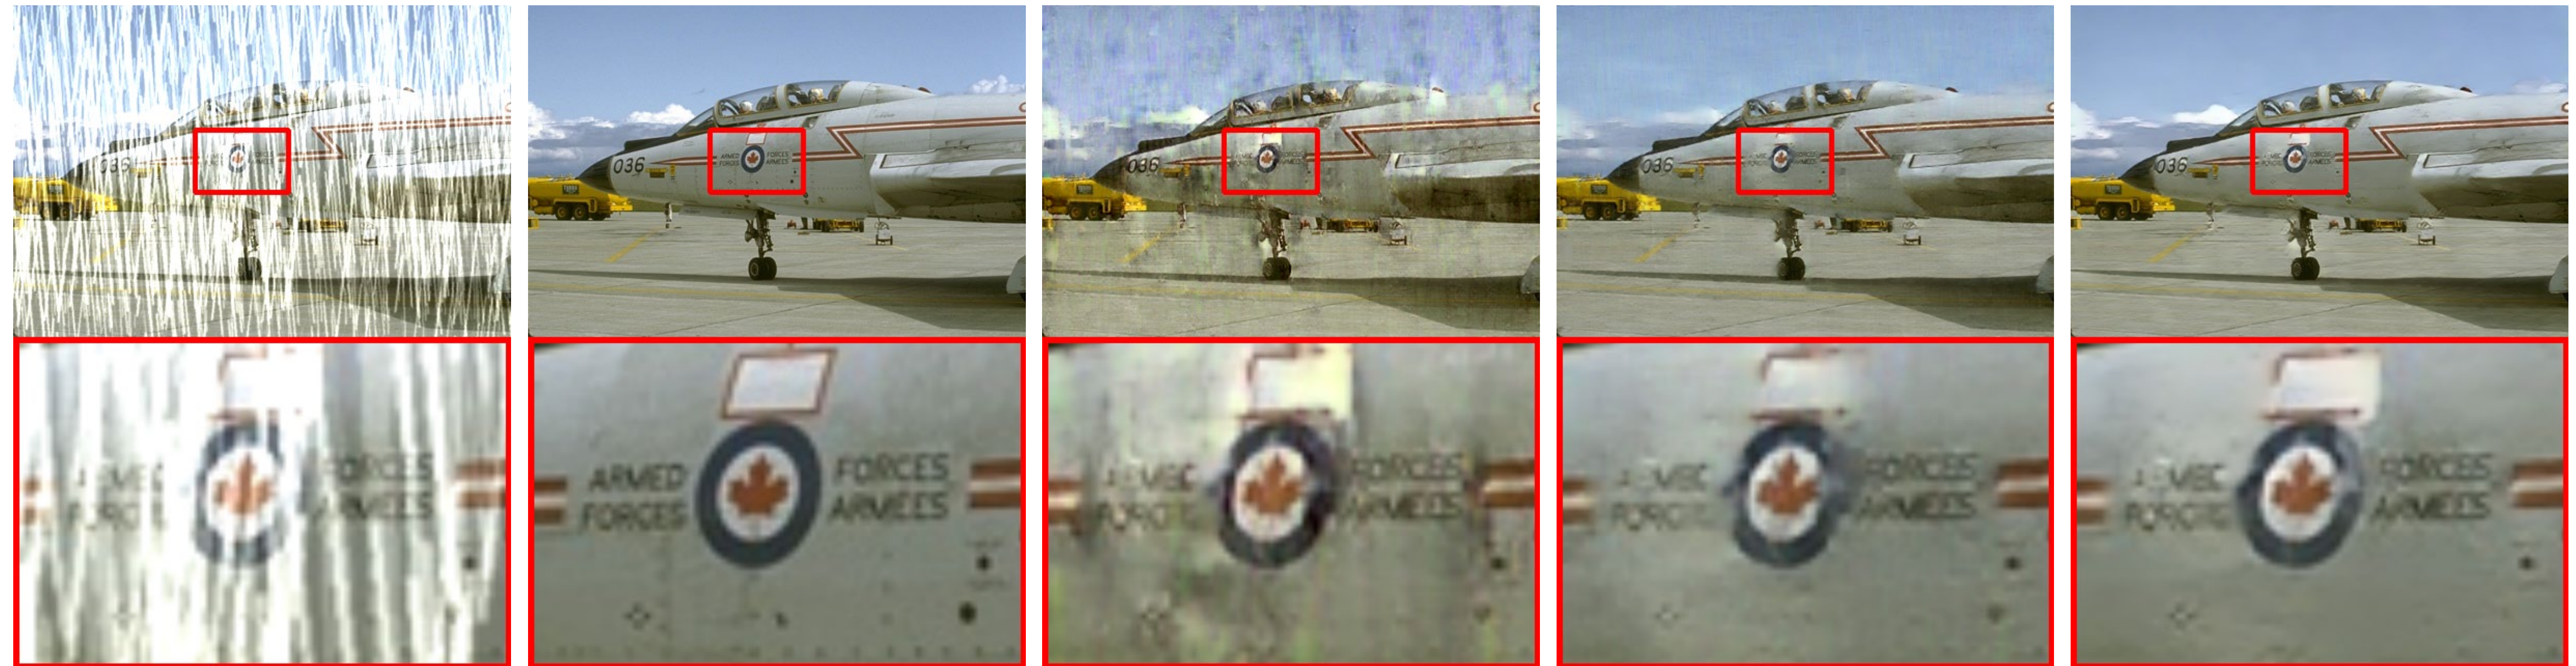

Input

Groundtruth

SIRR

RESCAN

PReNet

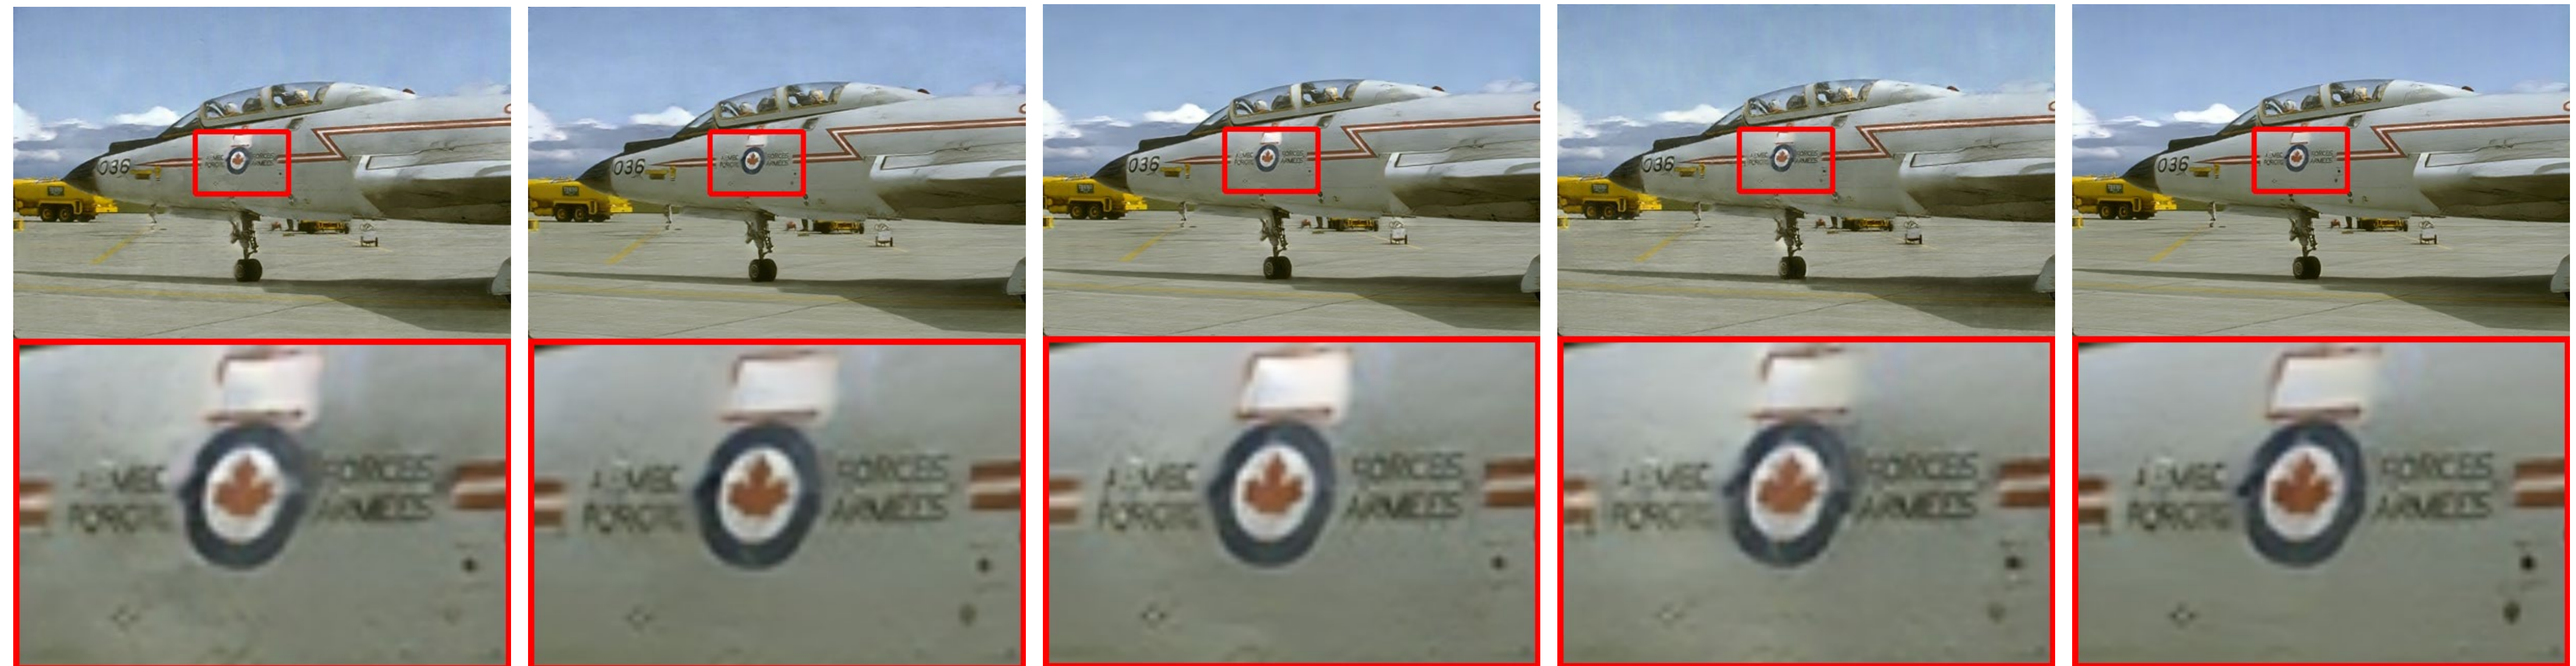

JORDER-E

RCDNet

BRN

ECNet (ours)

ECNet+LL (ours)



# Experimental results on Rain200L

- **Dataset: Rain200L [7]**

The quantitative comparison on Rain200L dataset  
(**Red**: the best result; **Blue**: the second best result).

| Methods | SIRR<br>[2] | RESCAN<br>[3] | PReNet<br>[4] | JORDER-E<br>[5] | RCDNet<br>[6] | BRN<br>[7] | ECNet<br>(ours) | ECNet+LL<br>(ours) |
|---------|-------------|---------------|---------------|-----------------|---------------|------------|-----------------|--------------------|
| PSNR    | 32.21       | 38.43         | 37.93         | 39.13           | <b>39.49</b>  | 38.86      | 38.37           | <b>39.72</b>       |
| SSIM    | 0.931       | 0.982         | 0.983         | 0.985           | <b>0.986</b>  | 0.985      | 0.983           | <b>0.987</b>       |

Note: PSNR/SSIM are calculated on Y channel

- Training pairs: 1800
- Testing pairs: 200



# Qualitative comparison on Rain200L

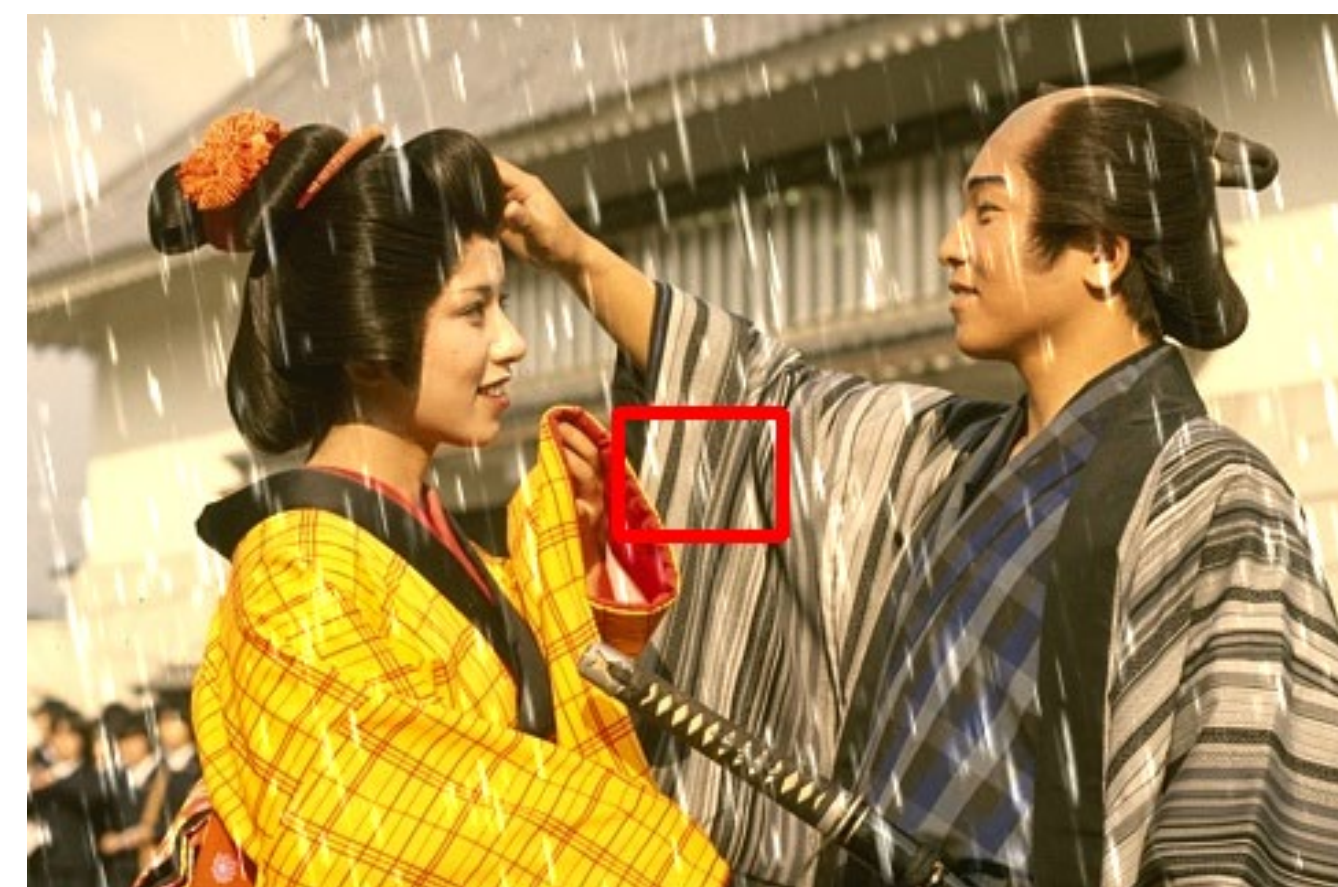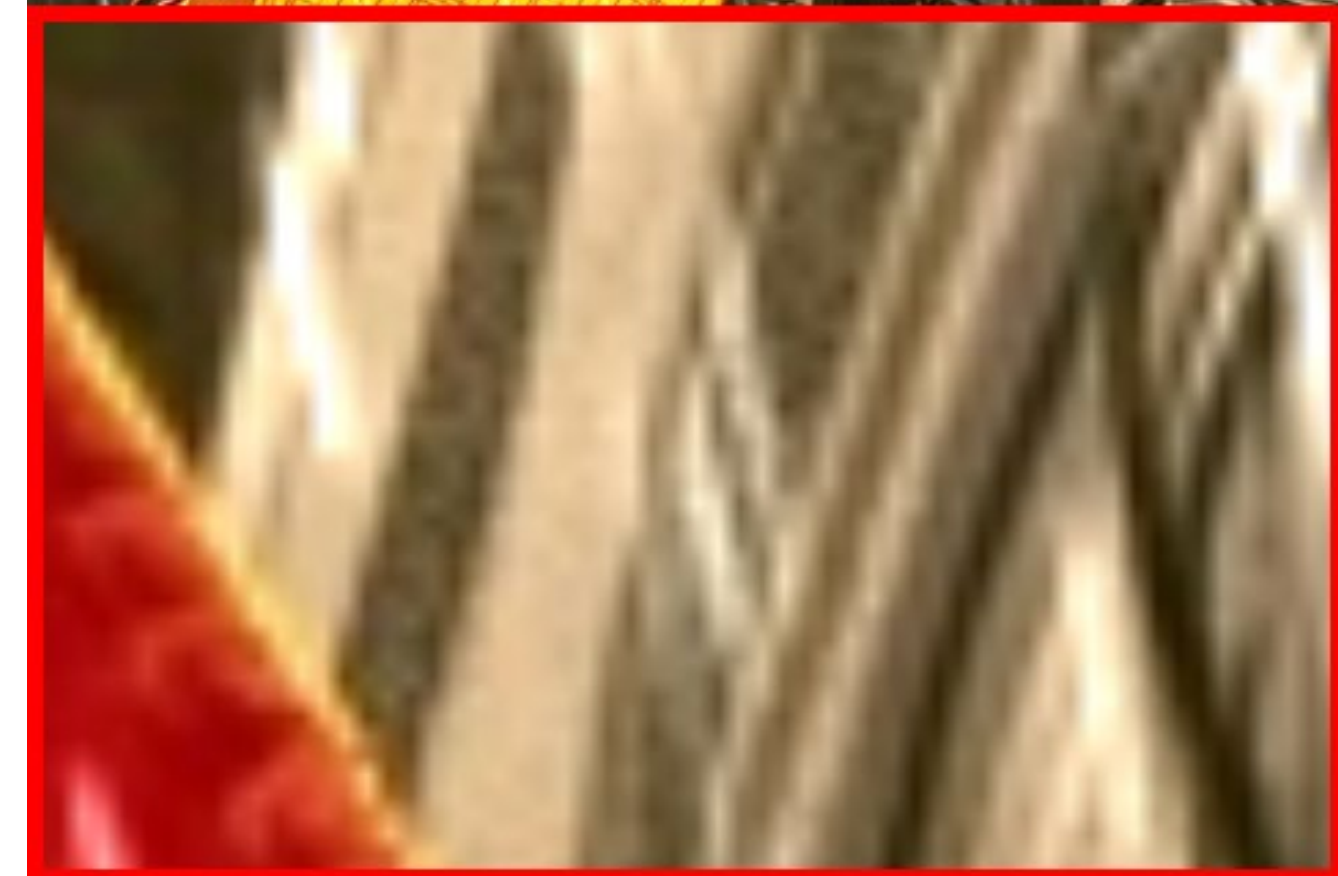

Input

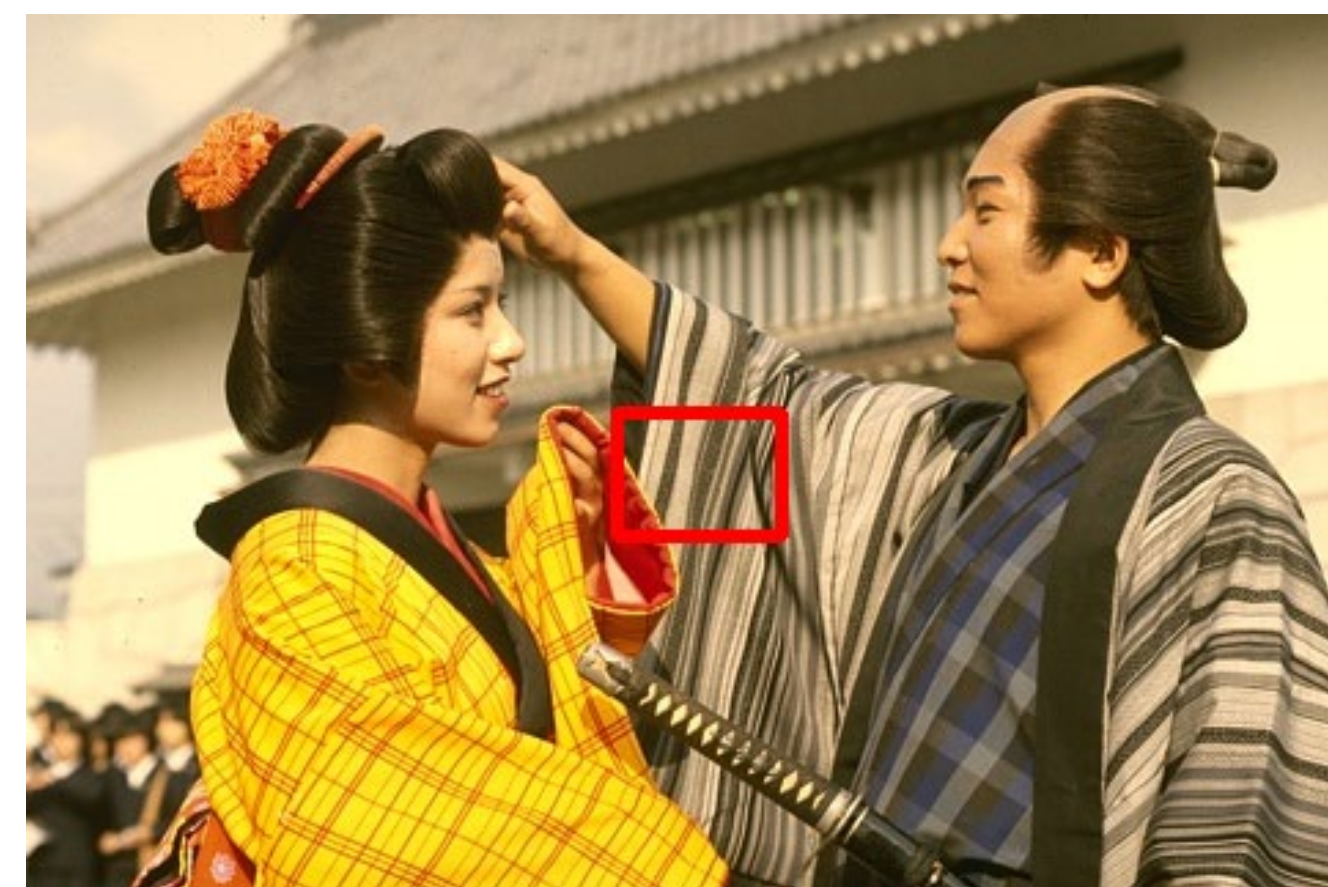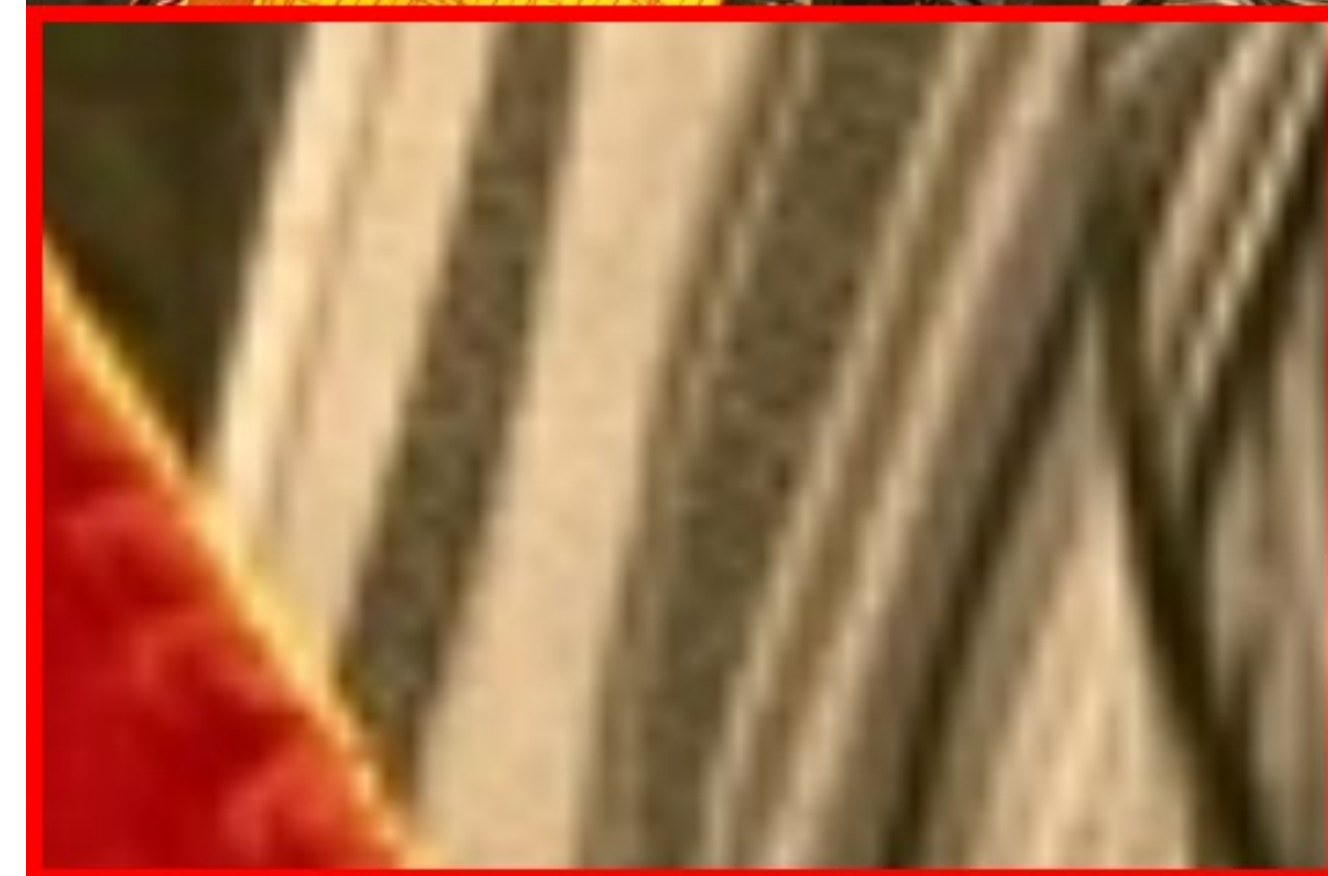

Groundtruth

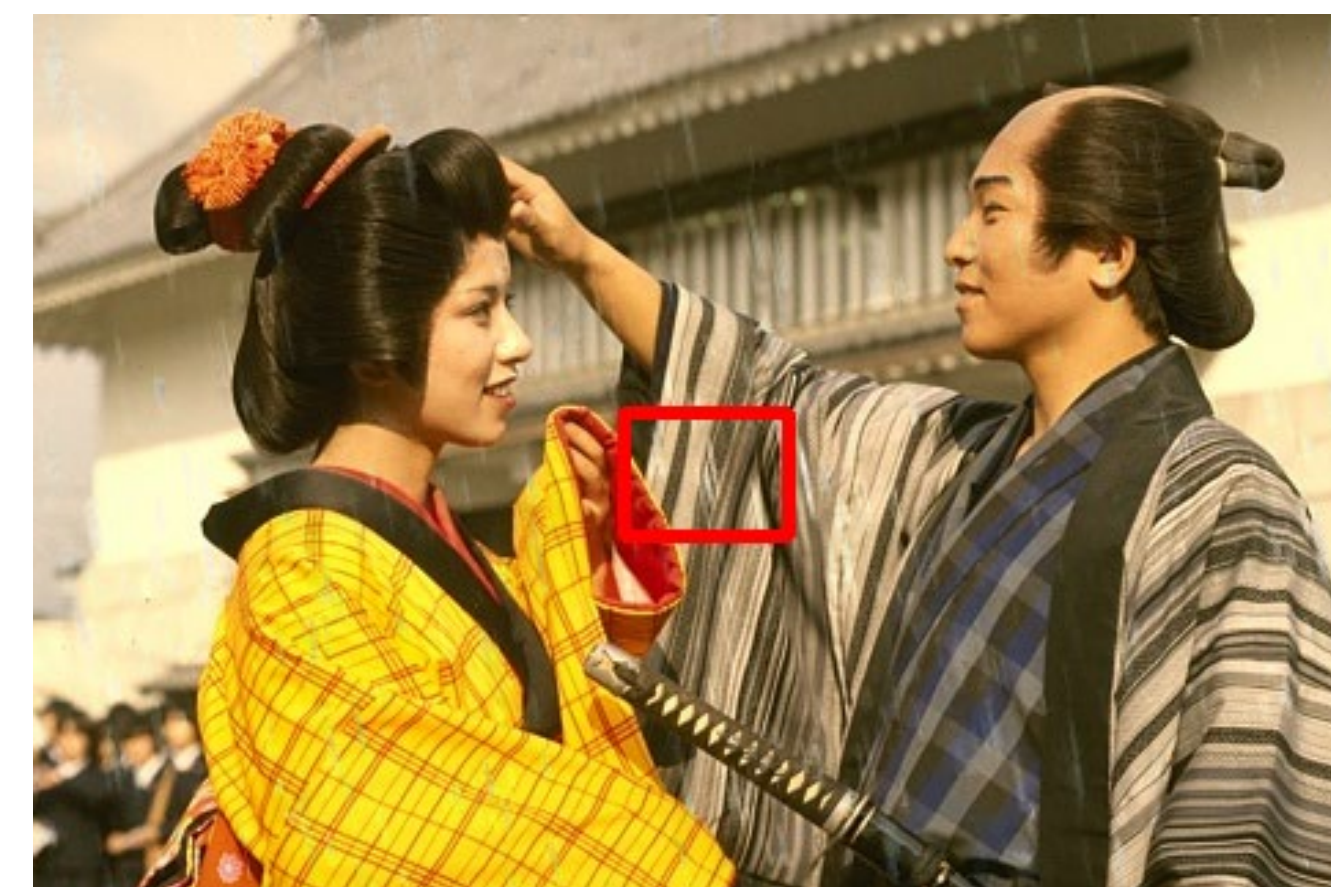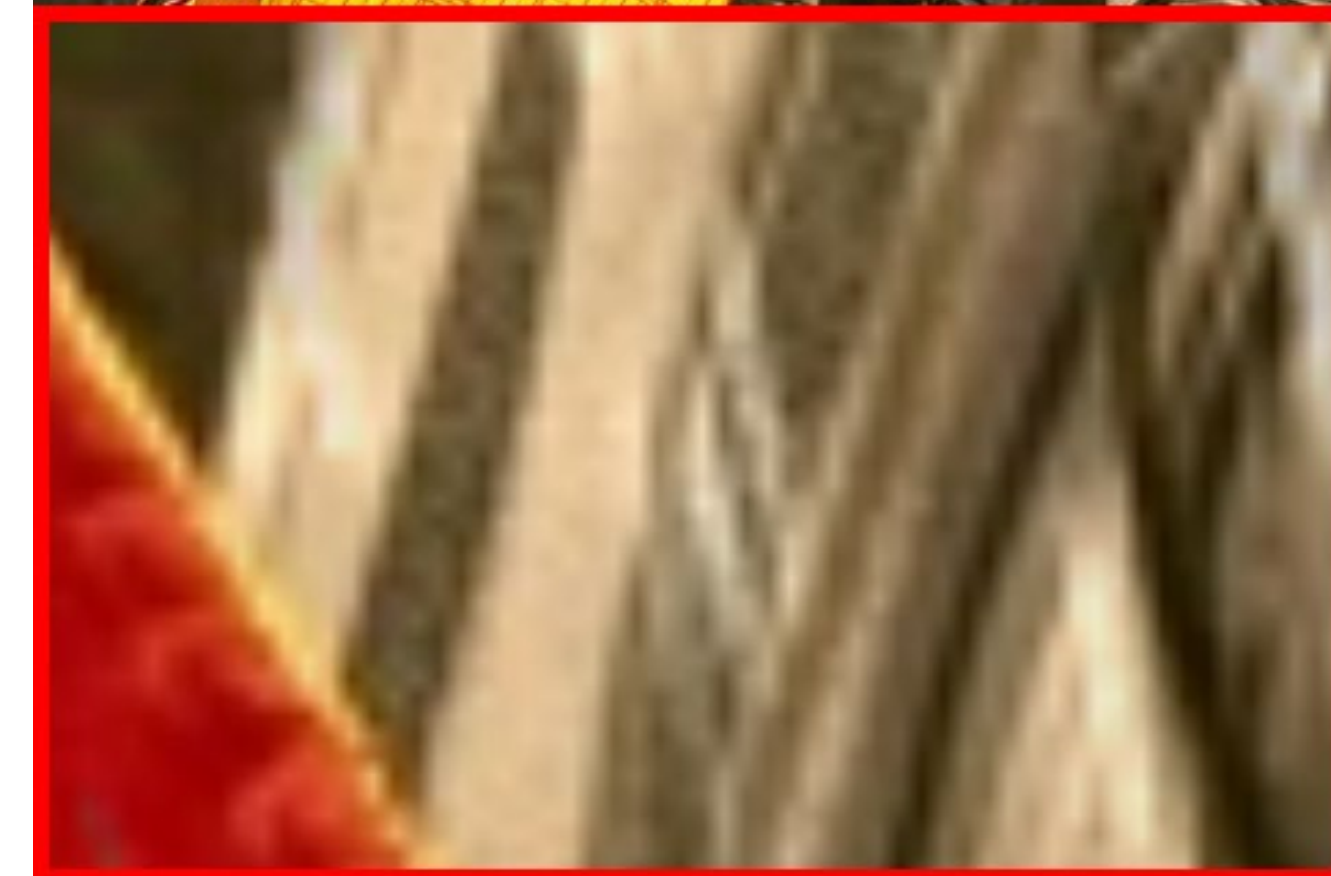

SIRR

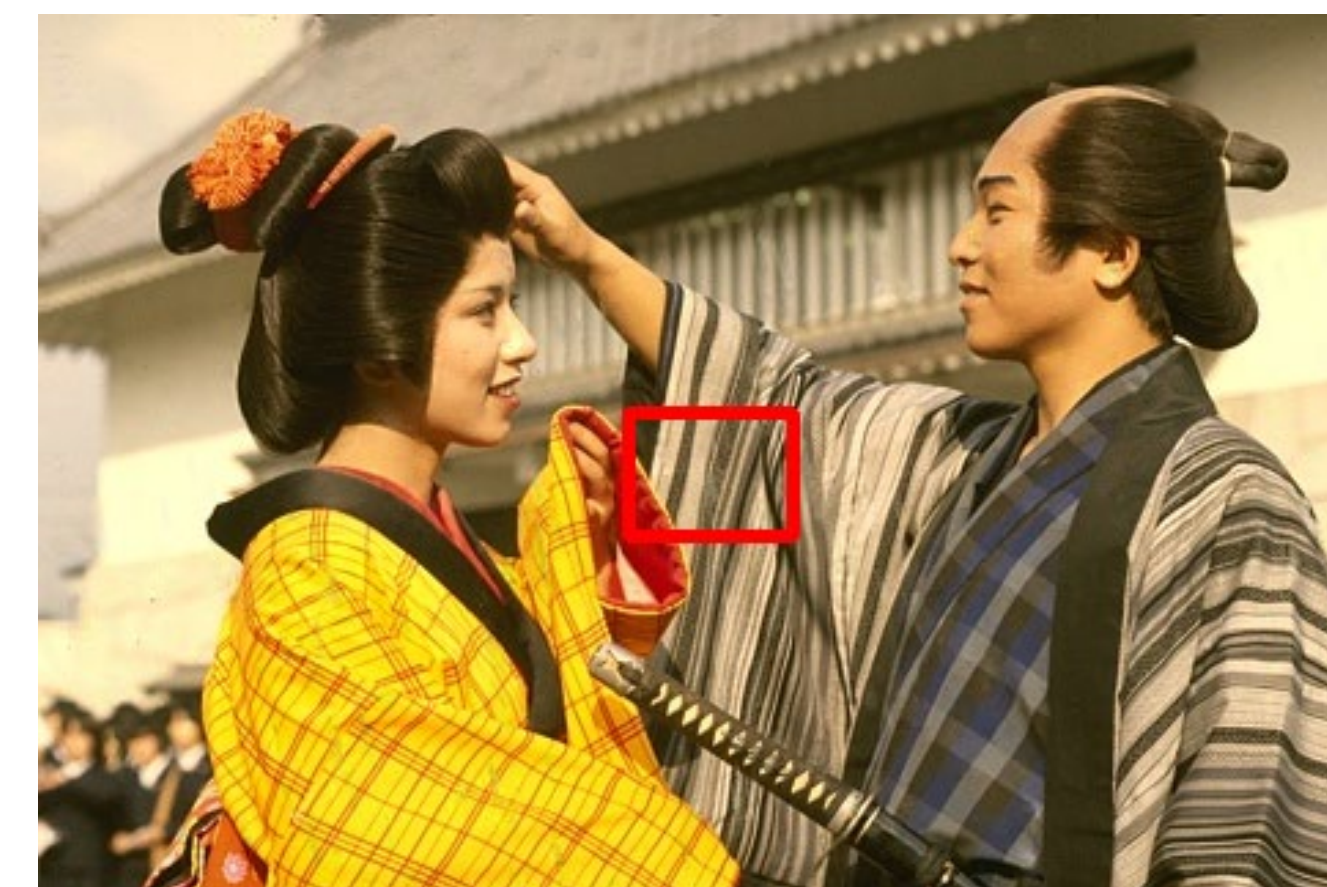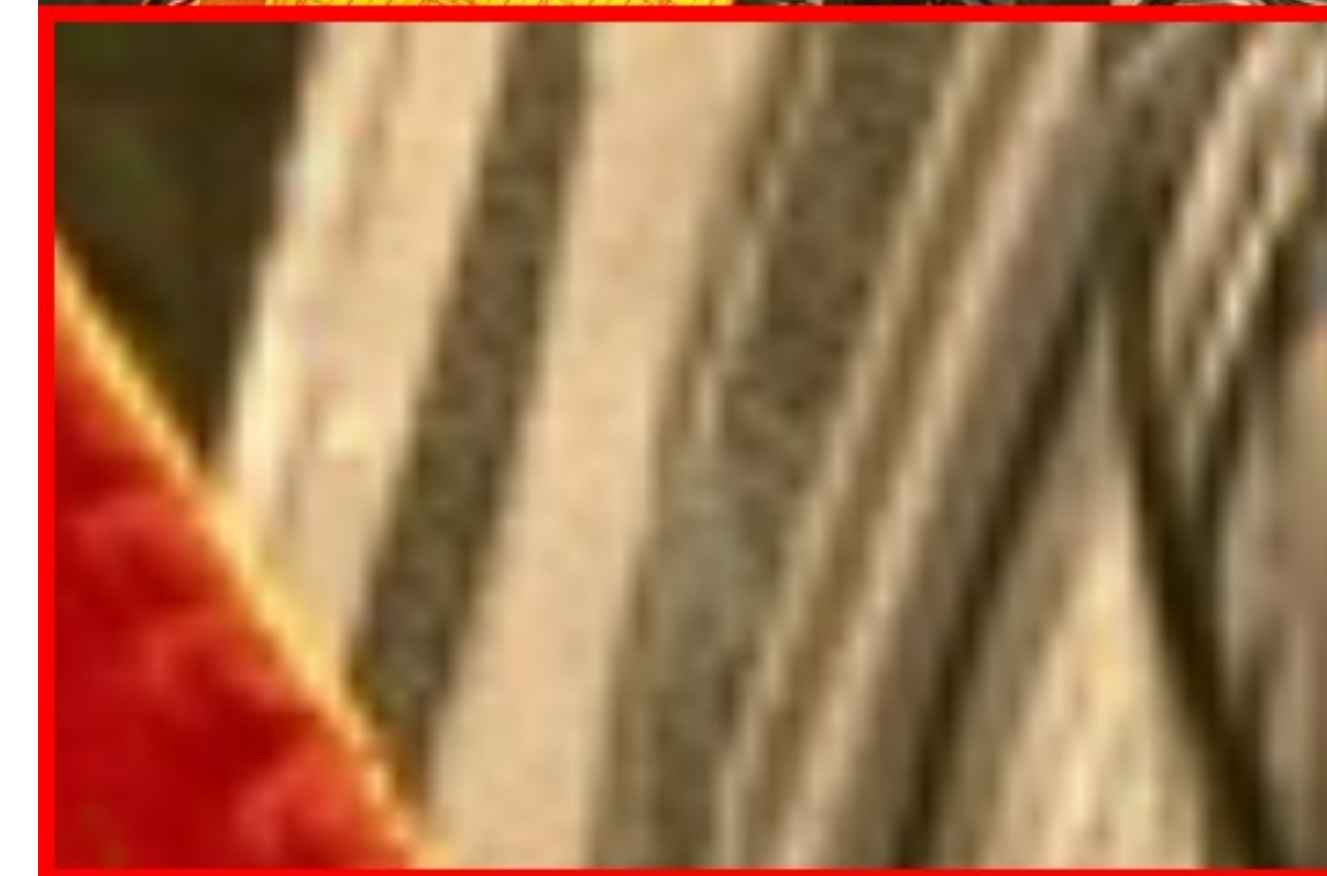

RESCAN

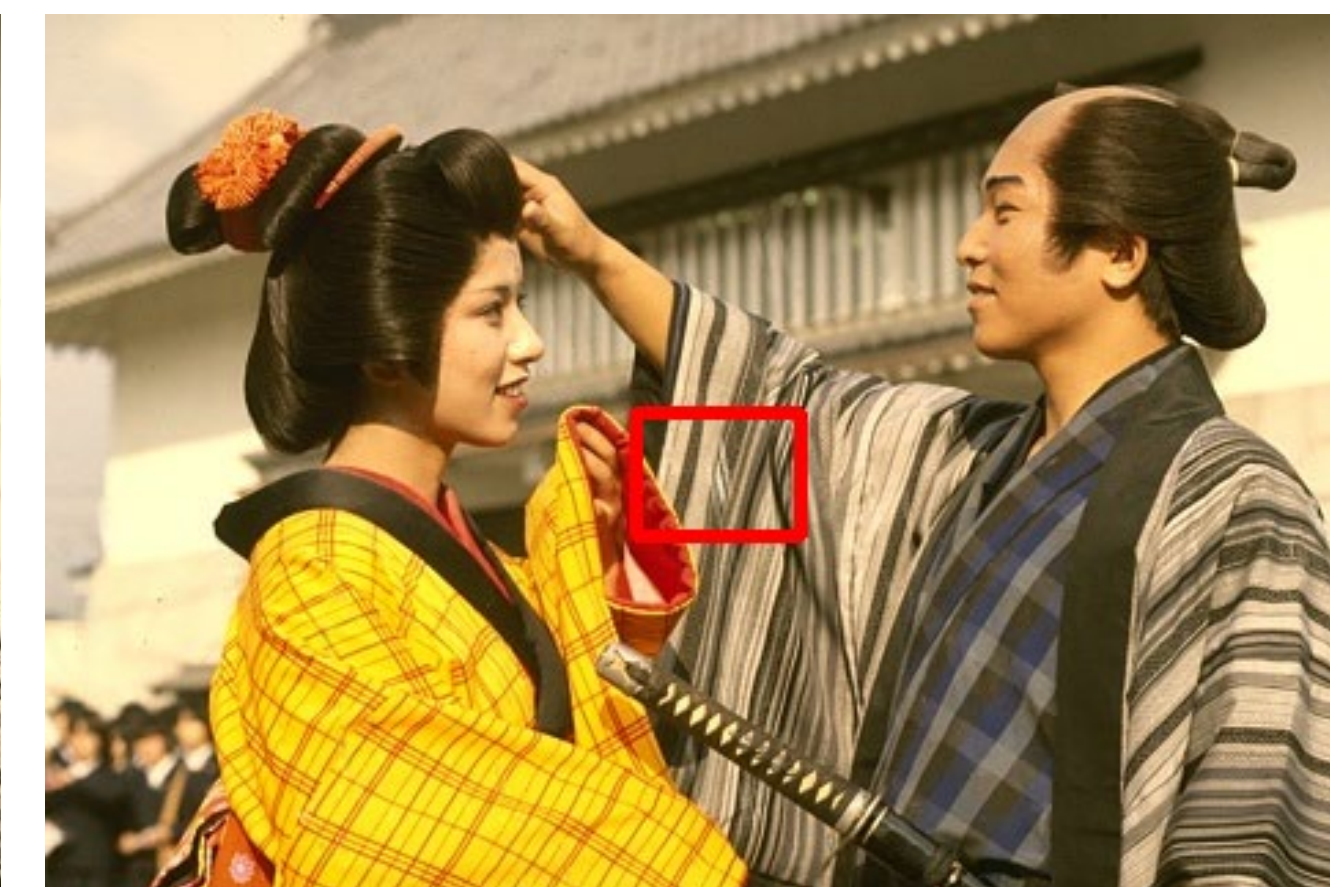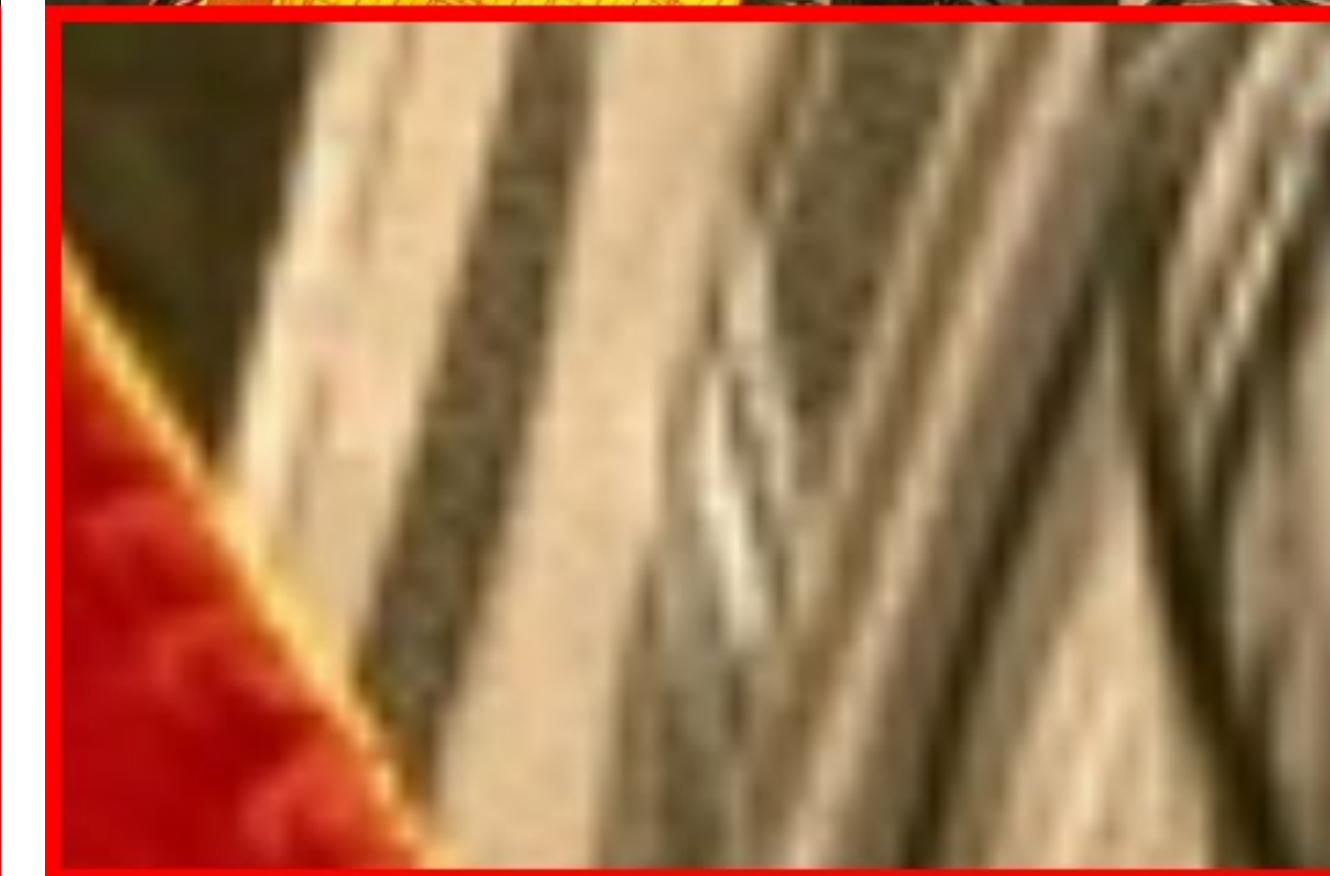

PReNet

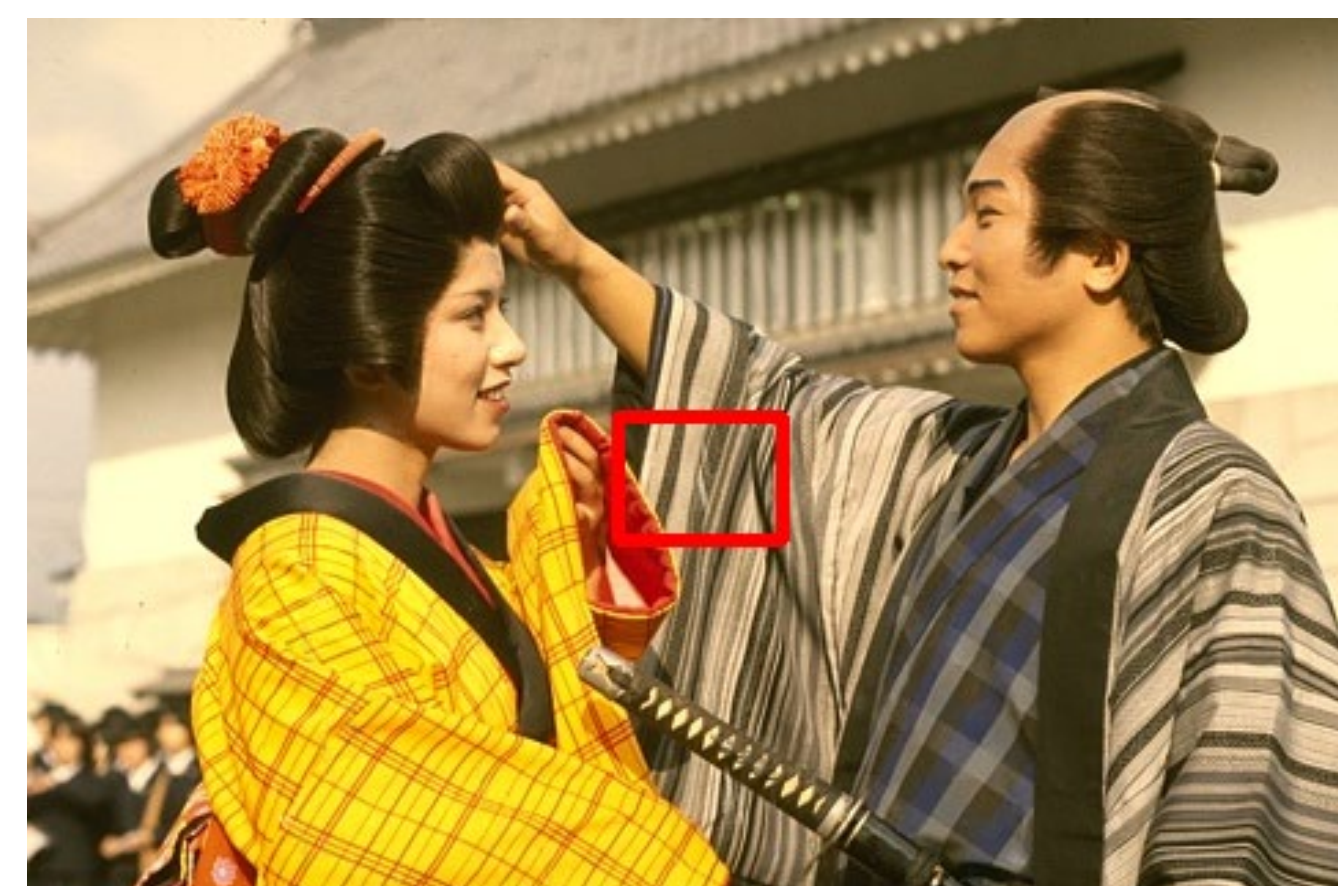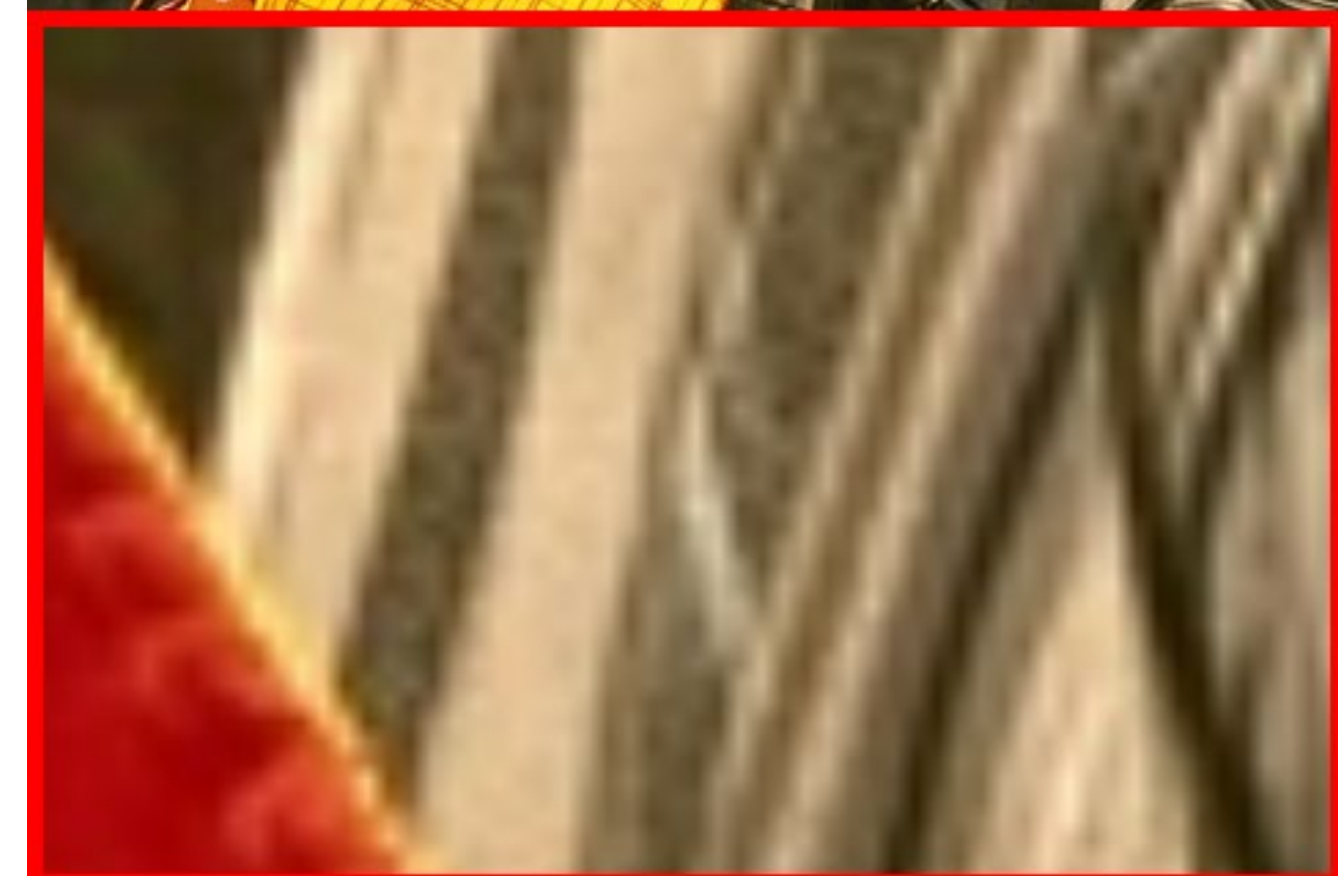

JORDER-E

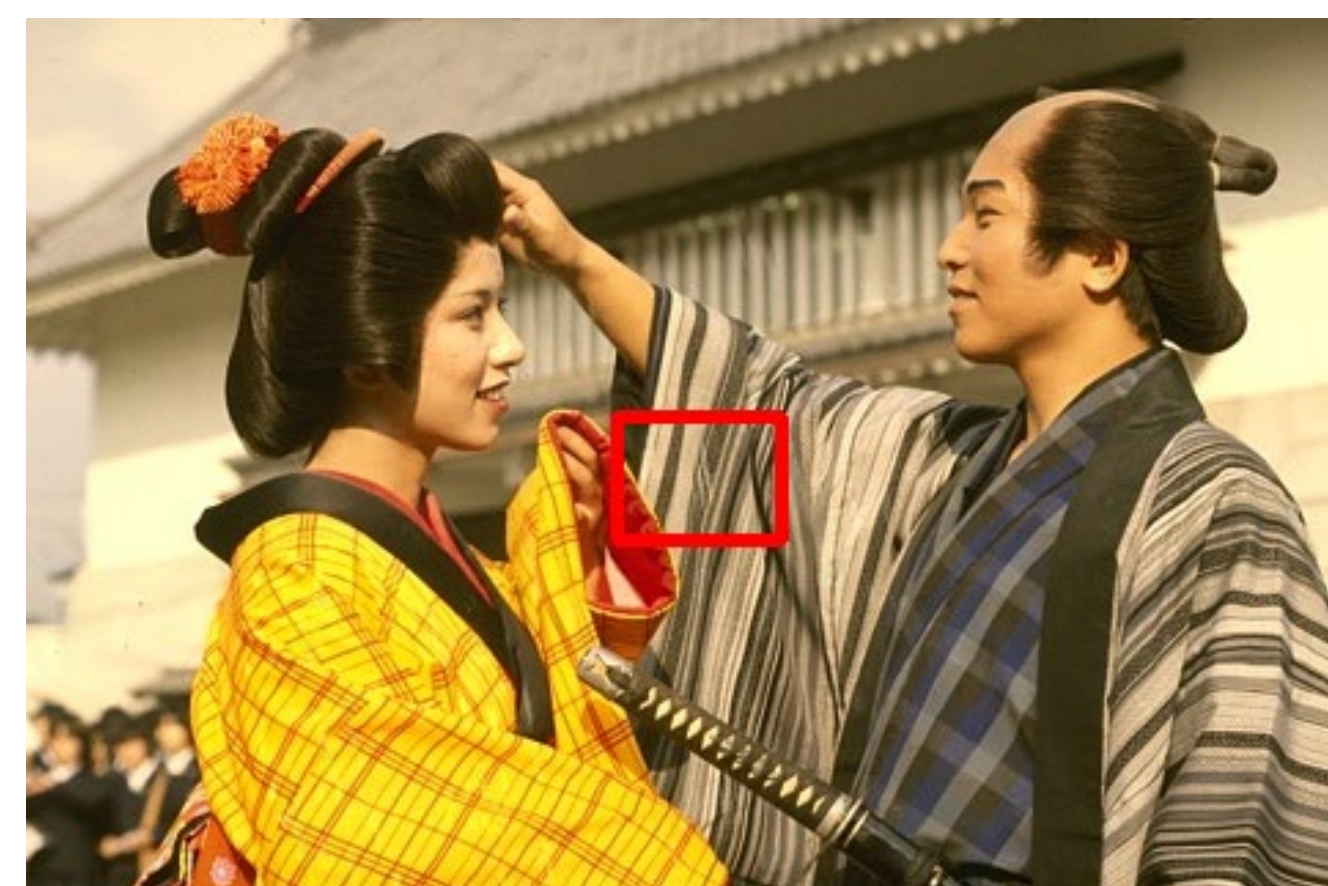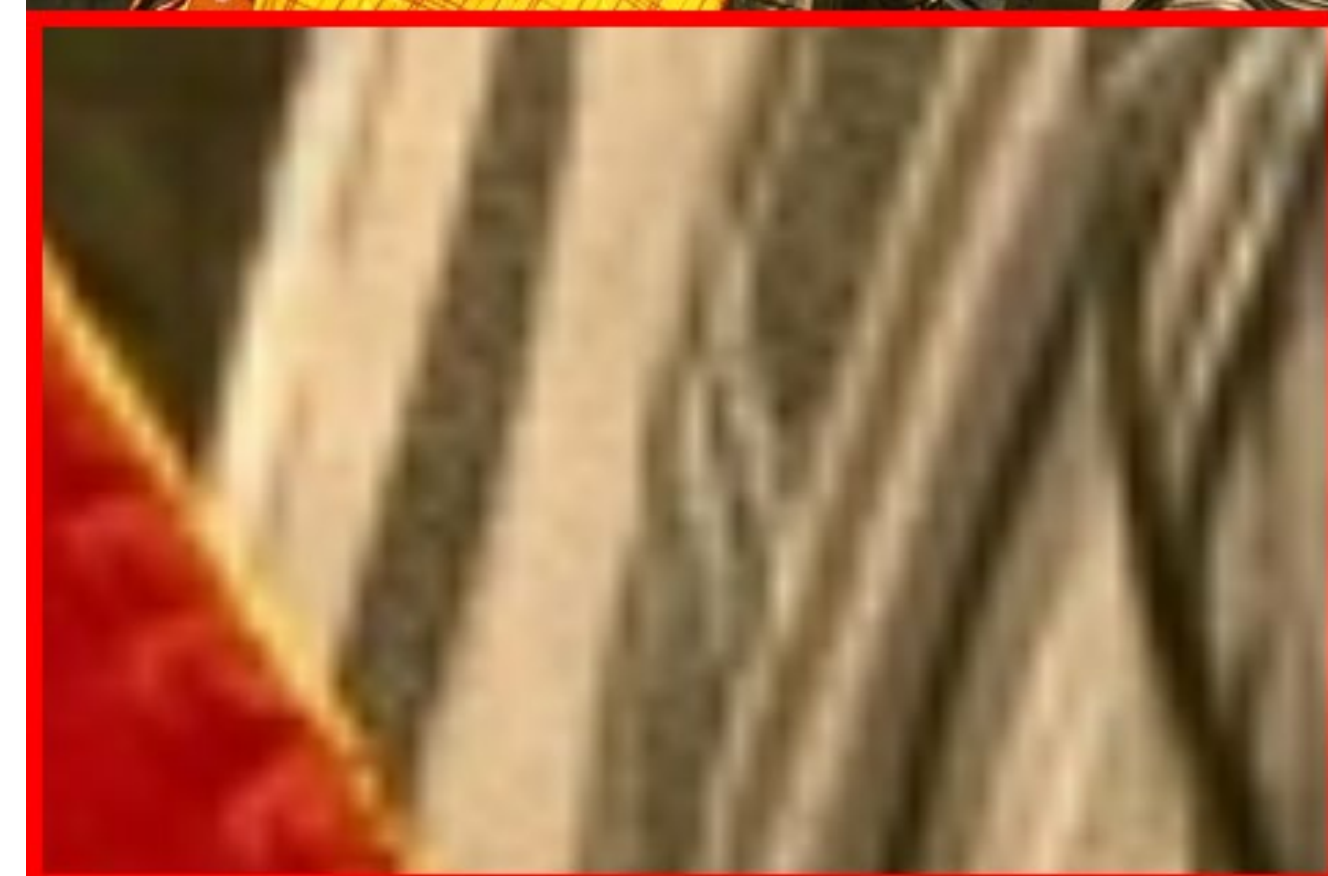

RCDNet

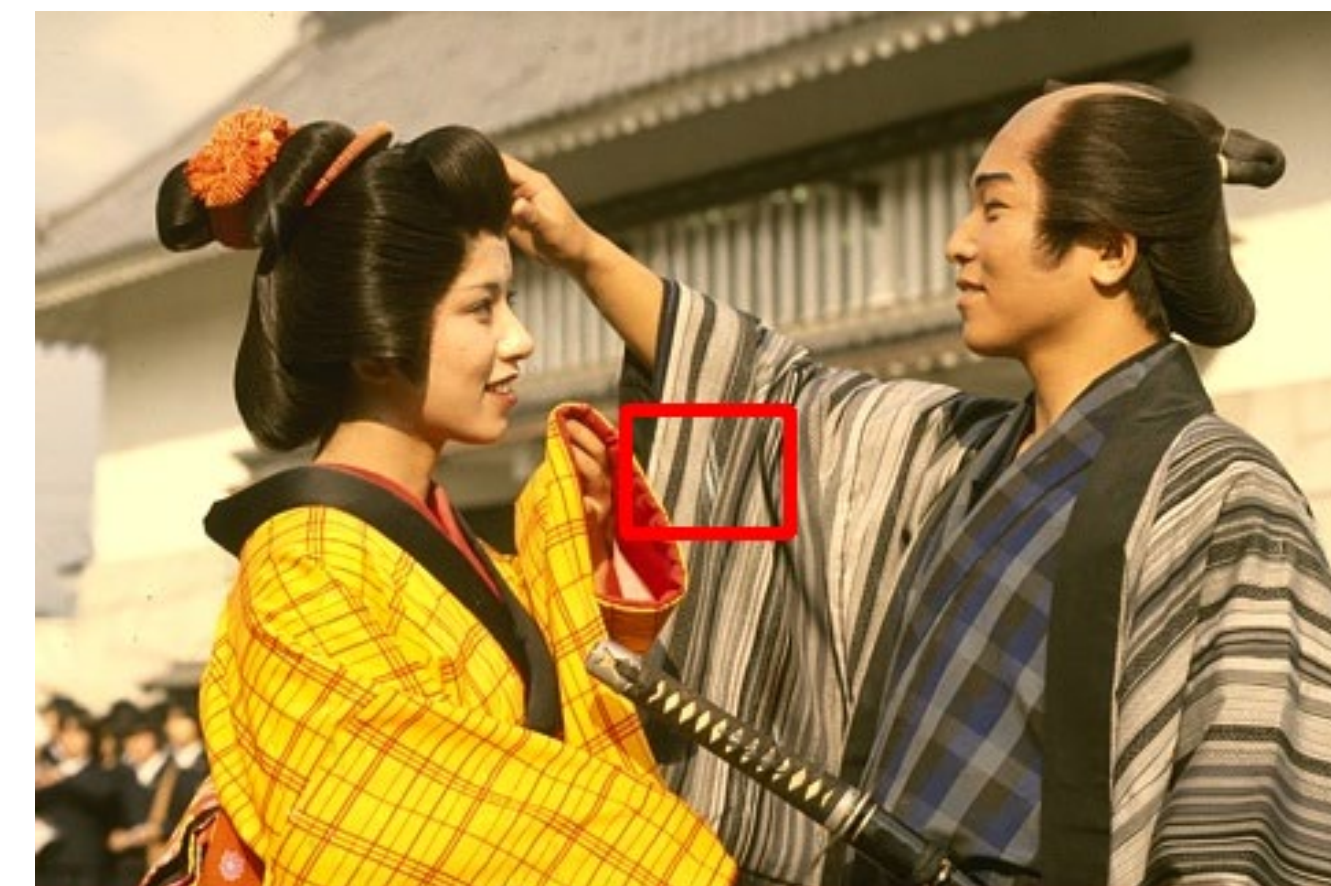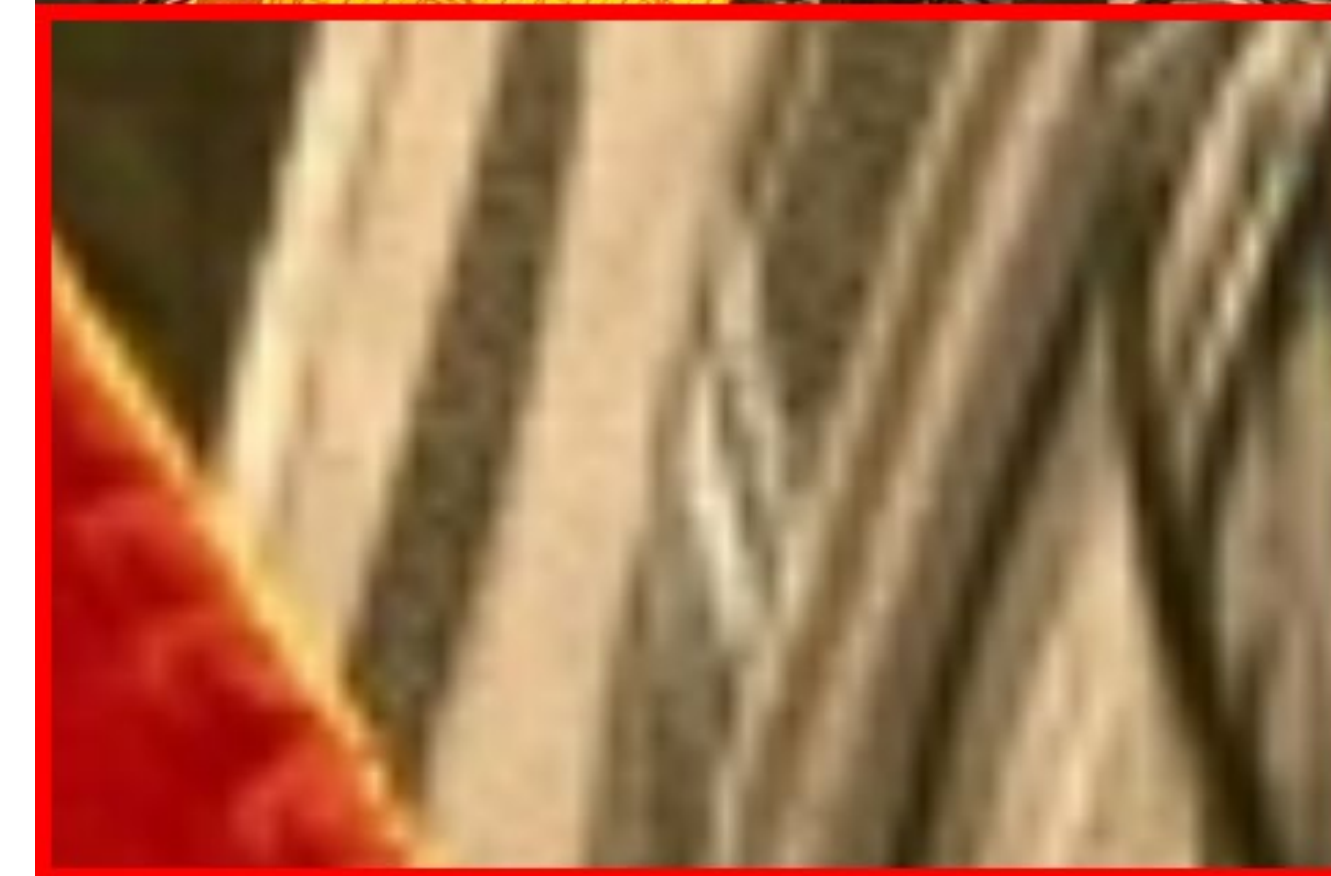

BRN

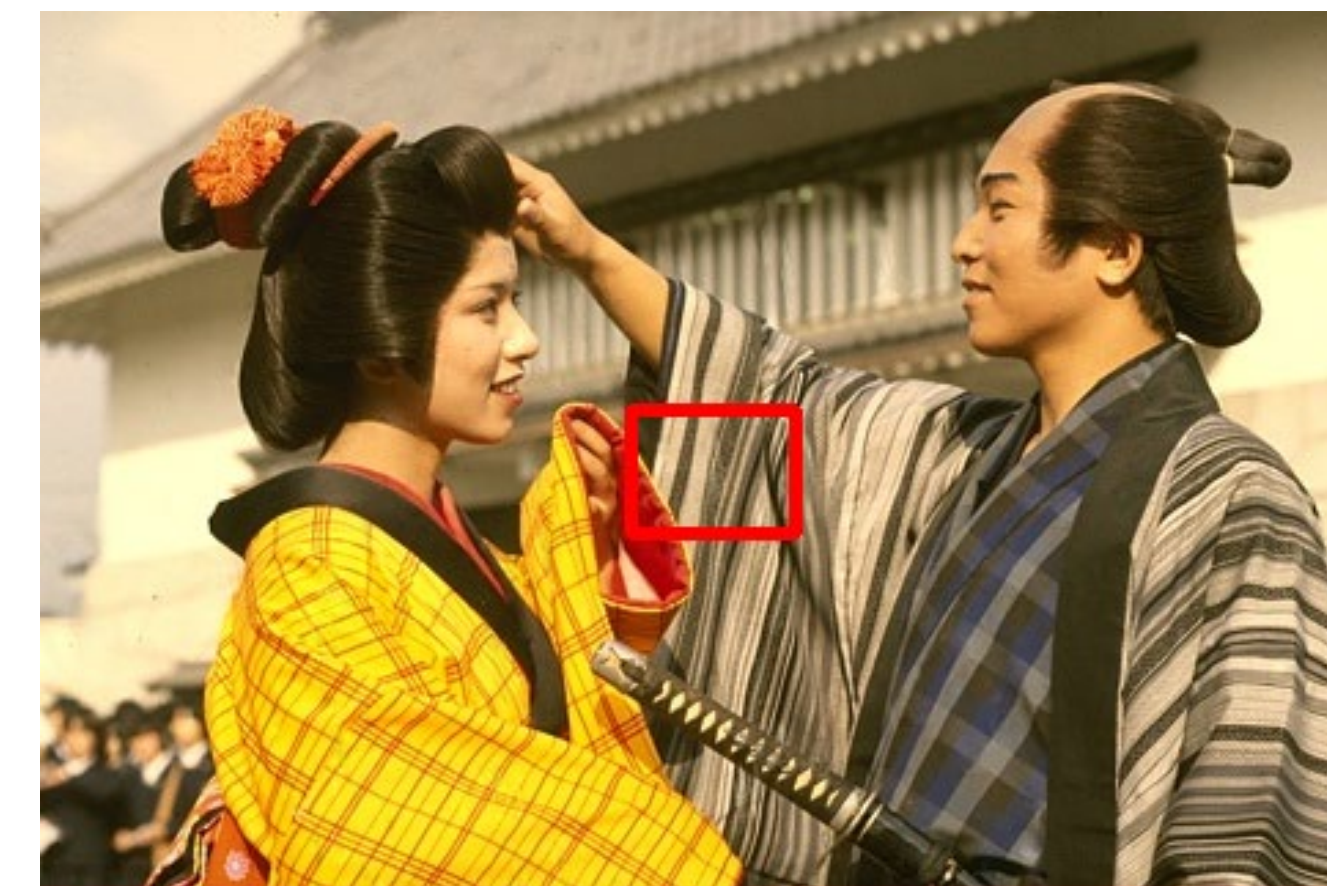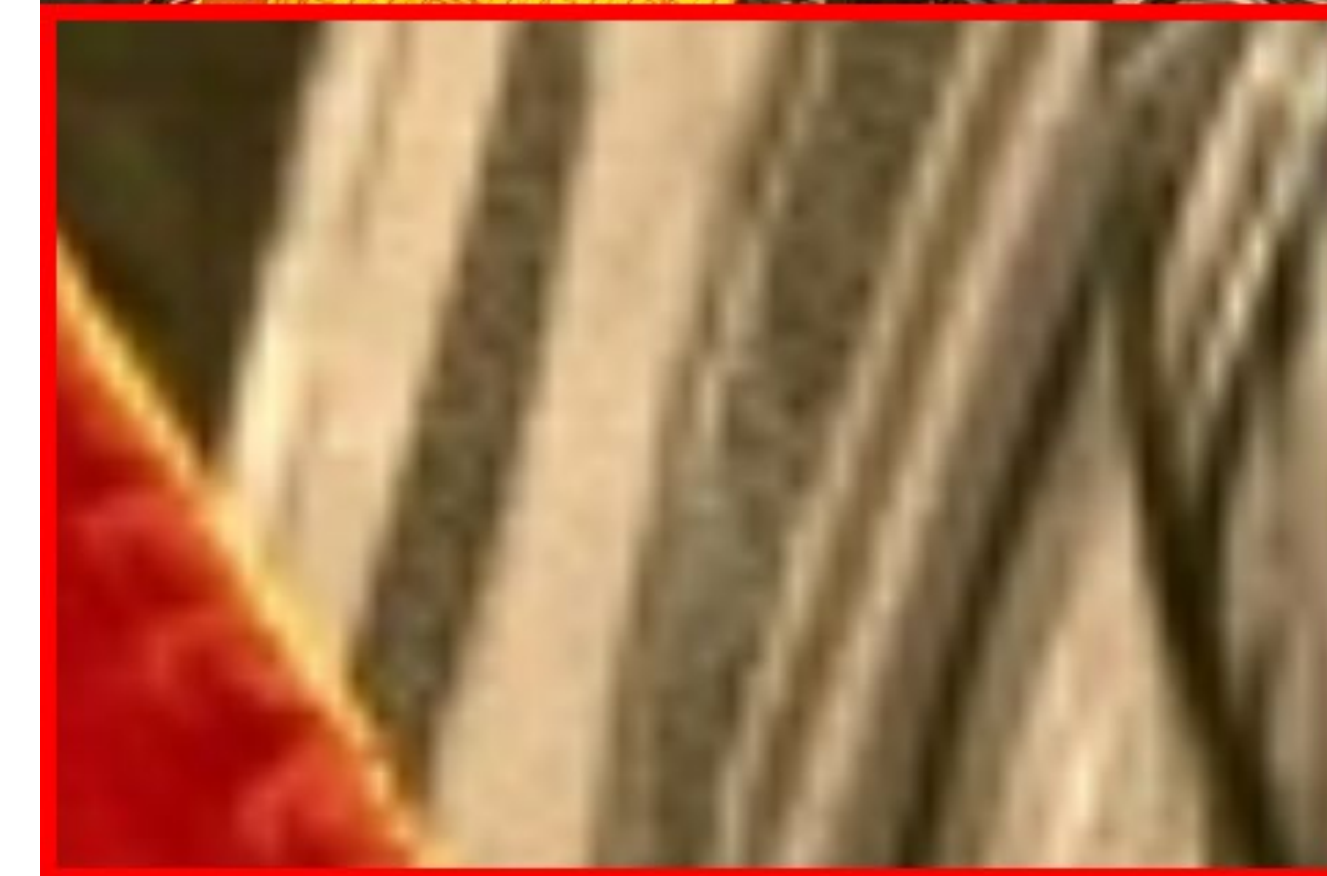

ECNet (ours)

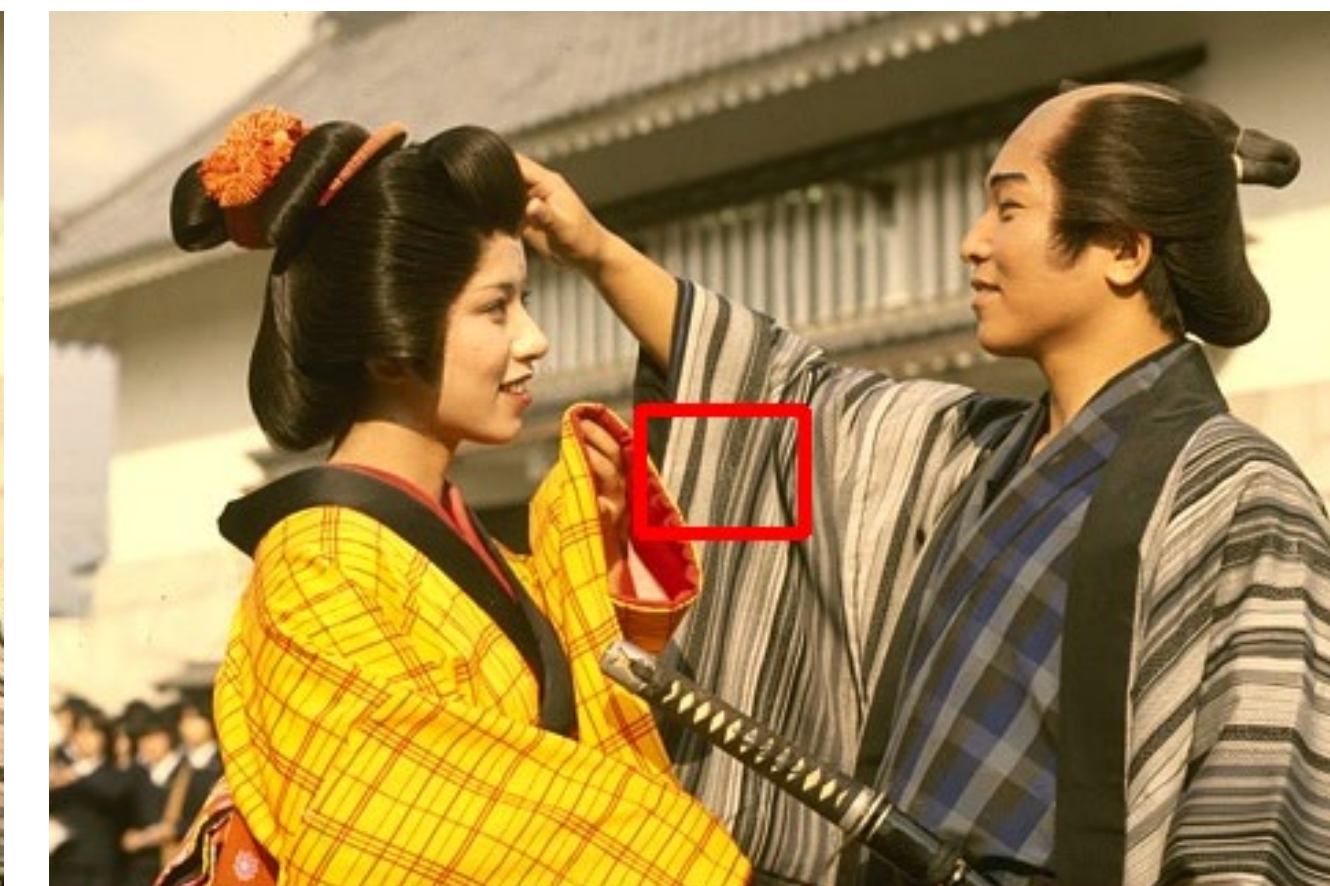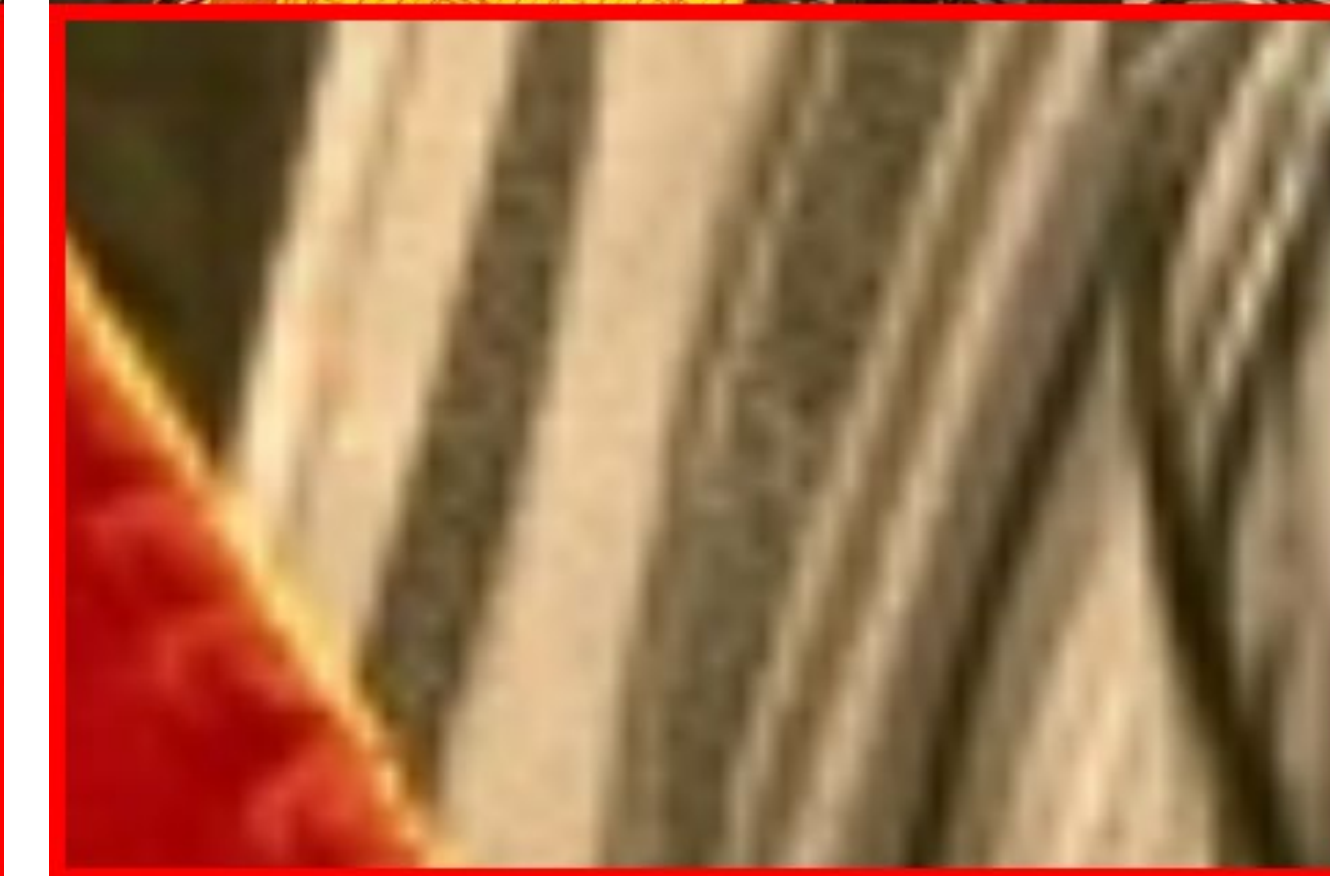

ECNet+LL (ours)



# Qualitative comparison on Rain200L

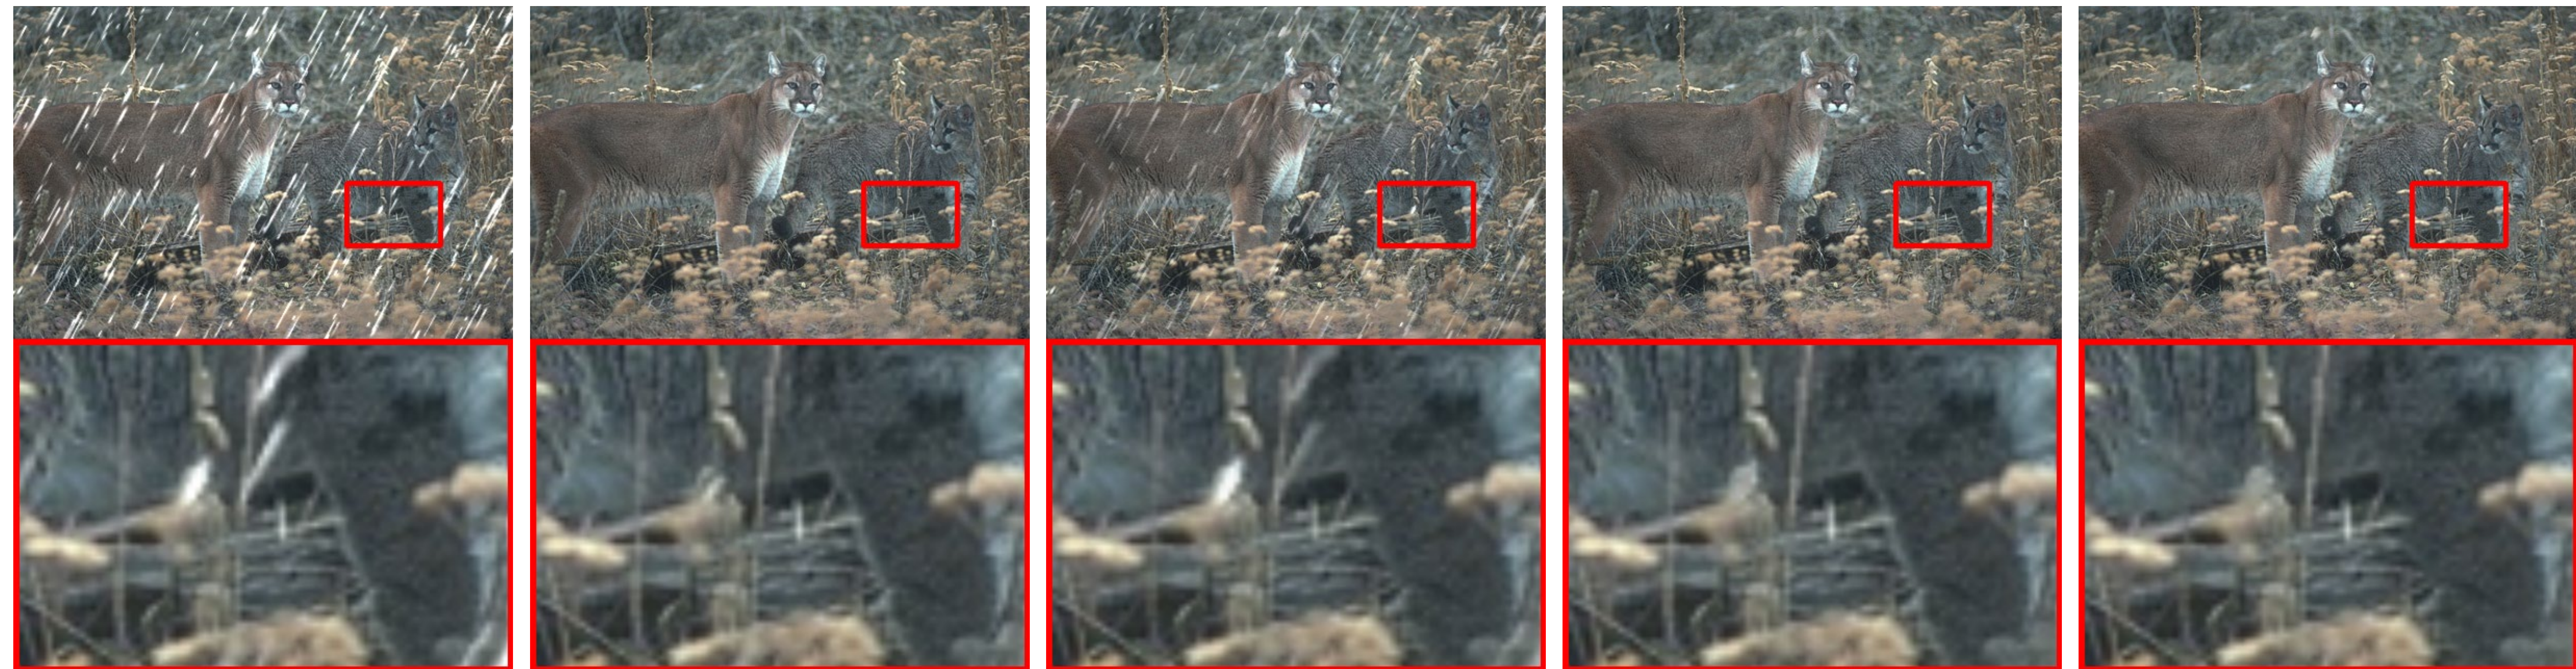

Input

Groundtruth

SIRR

RESCAN

PReNet

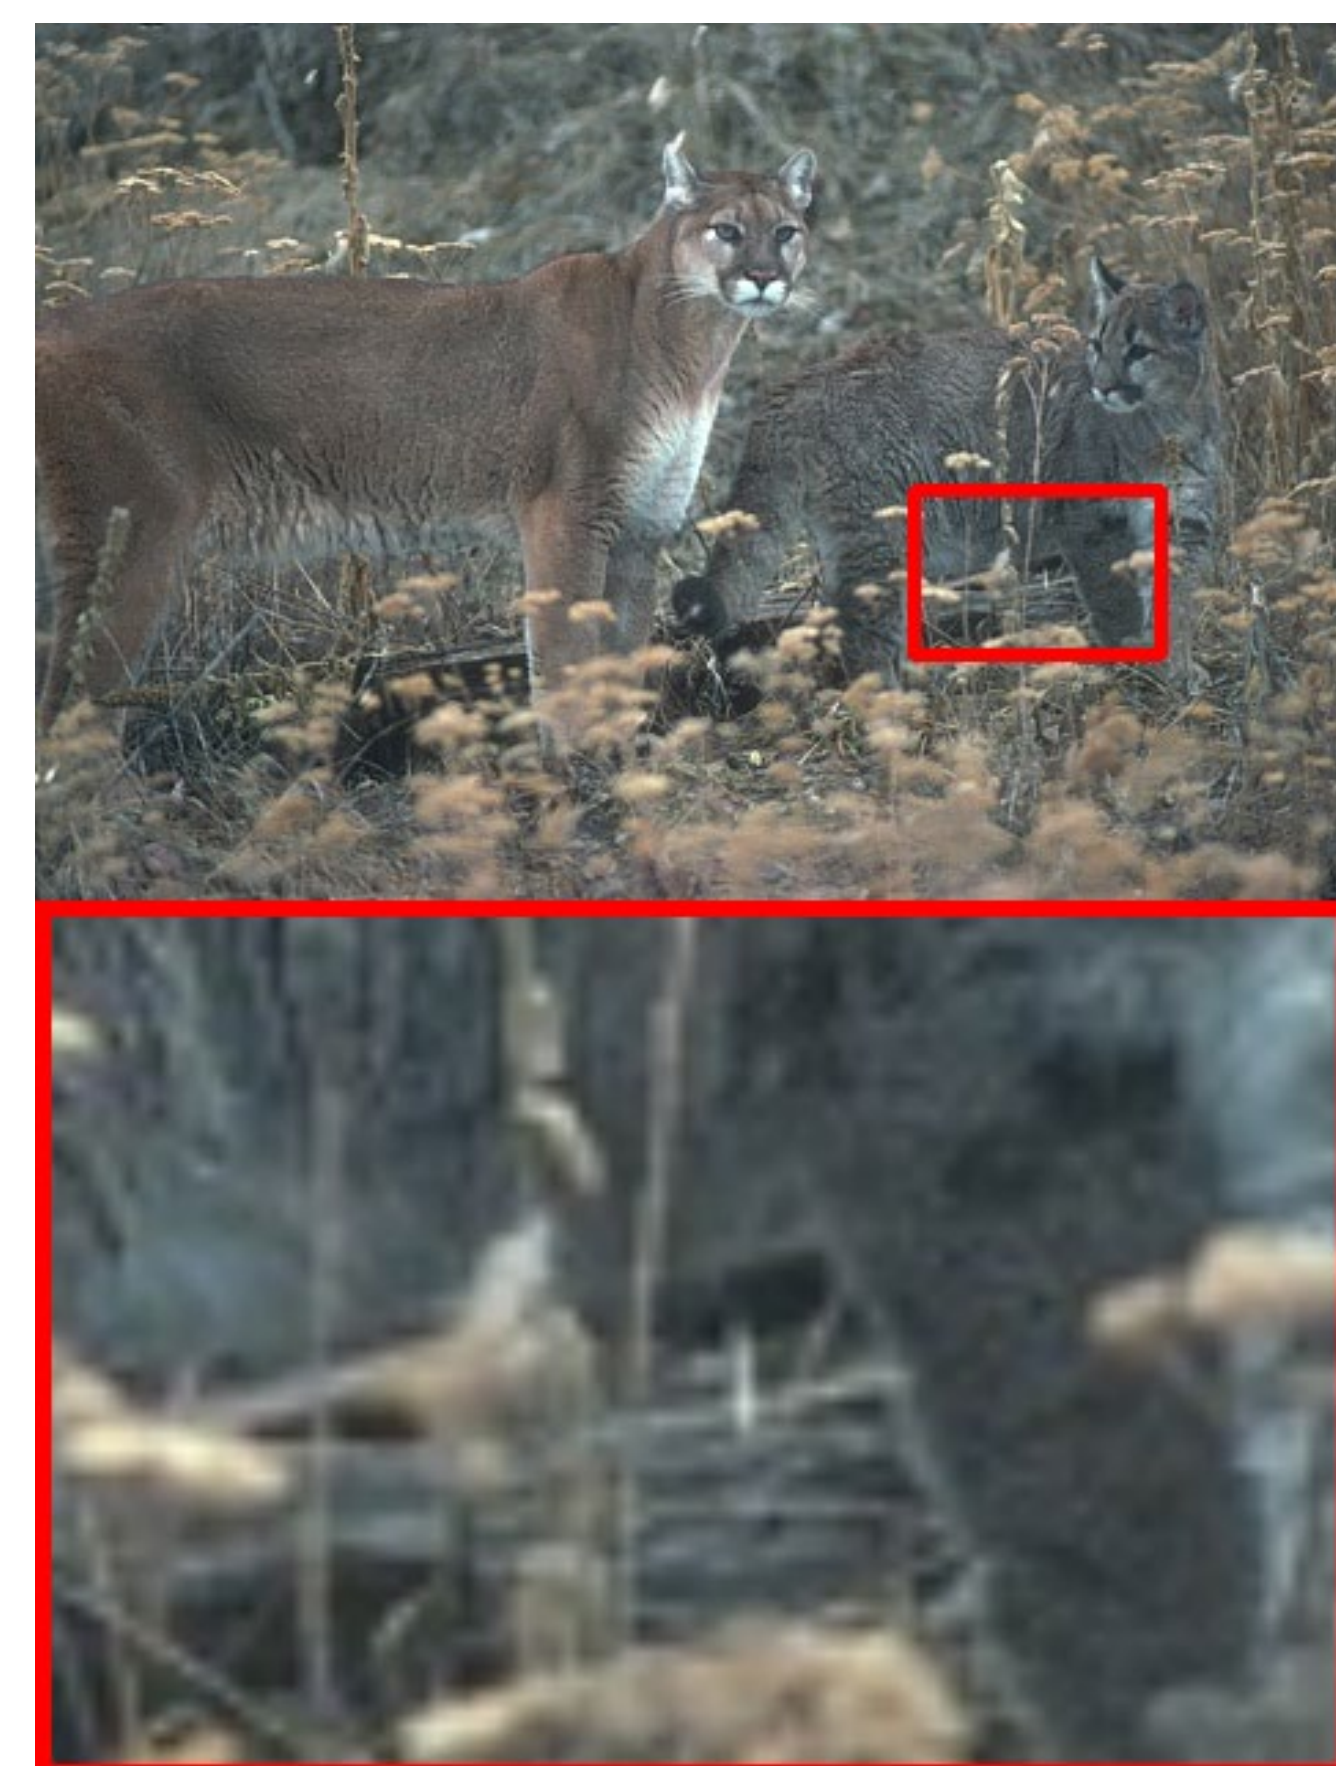

JORDER-E

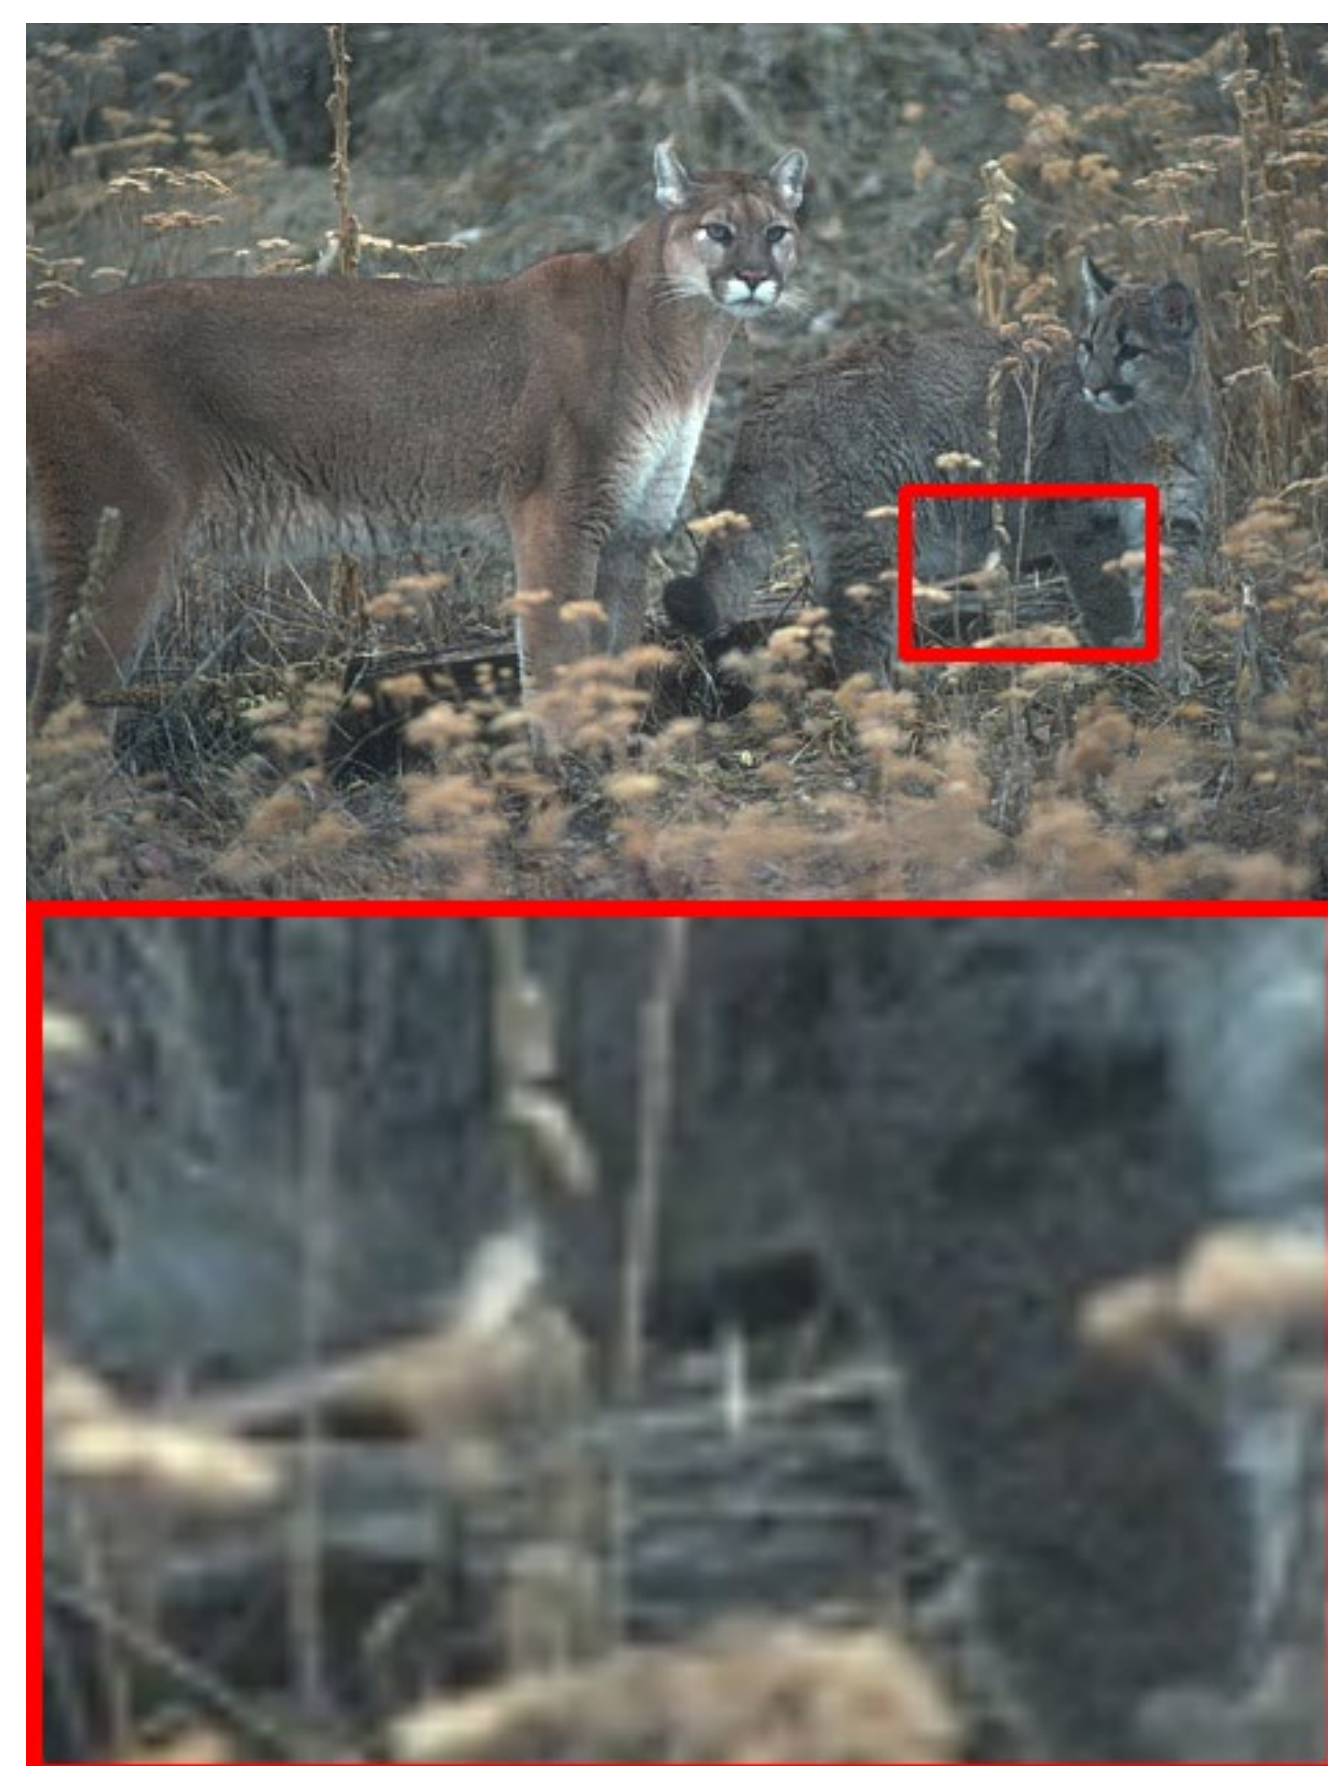

RCDNet

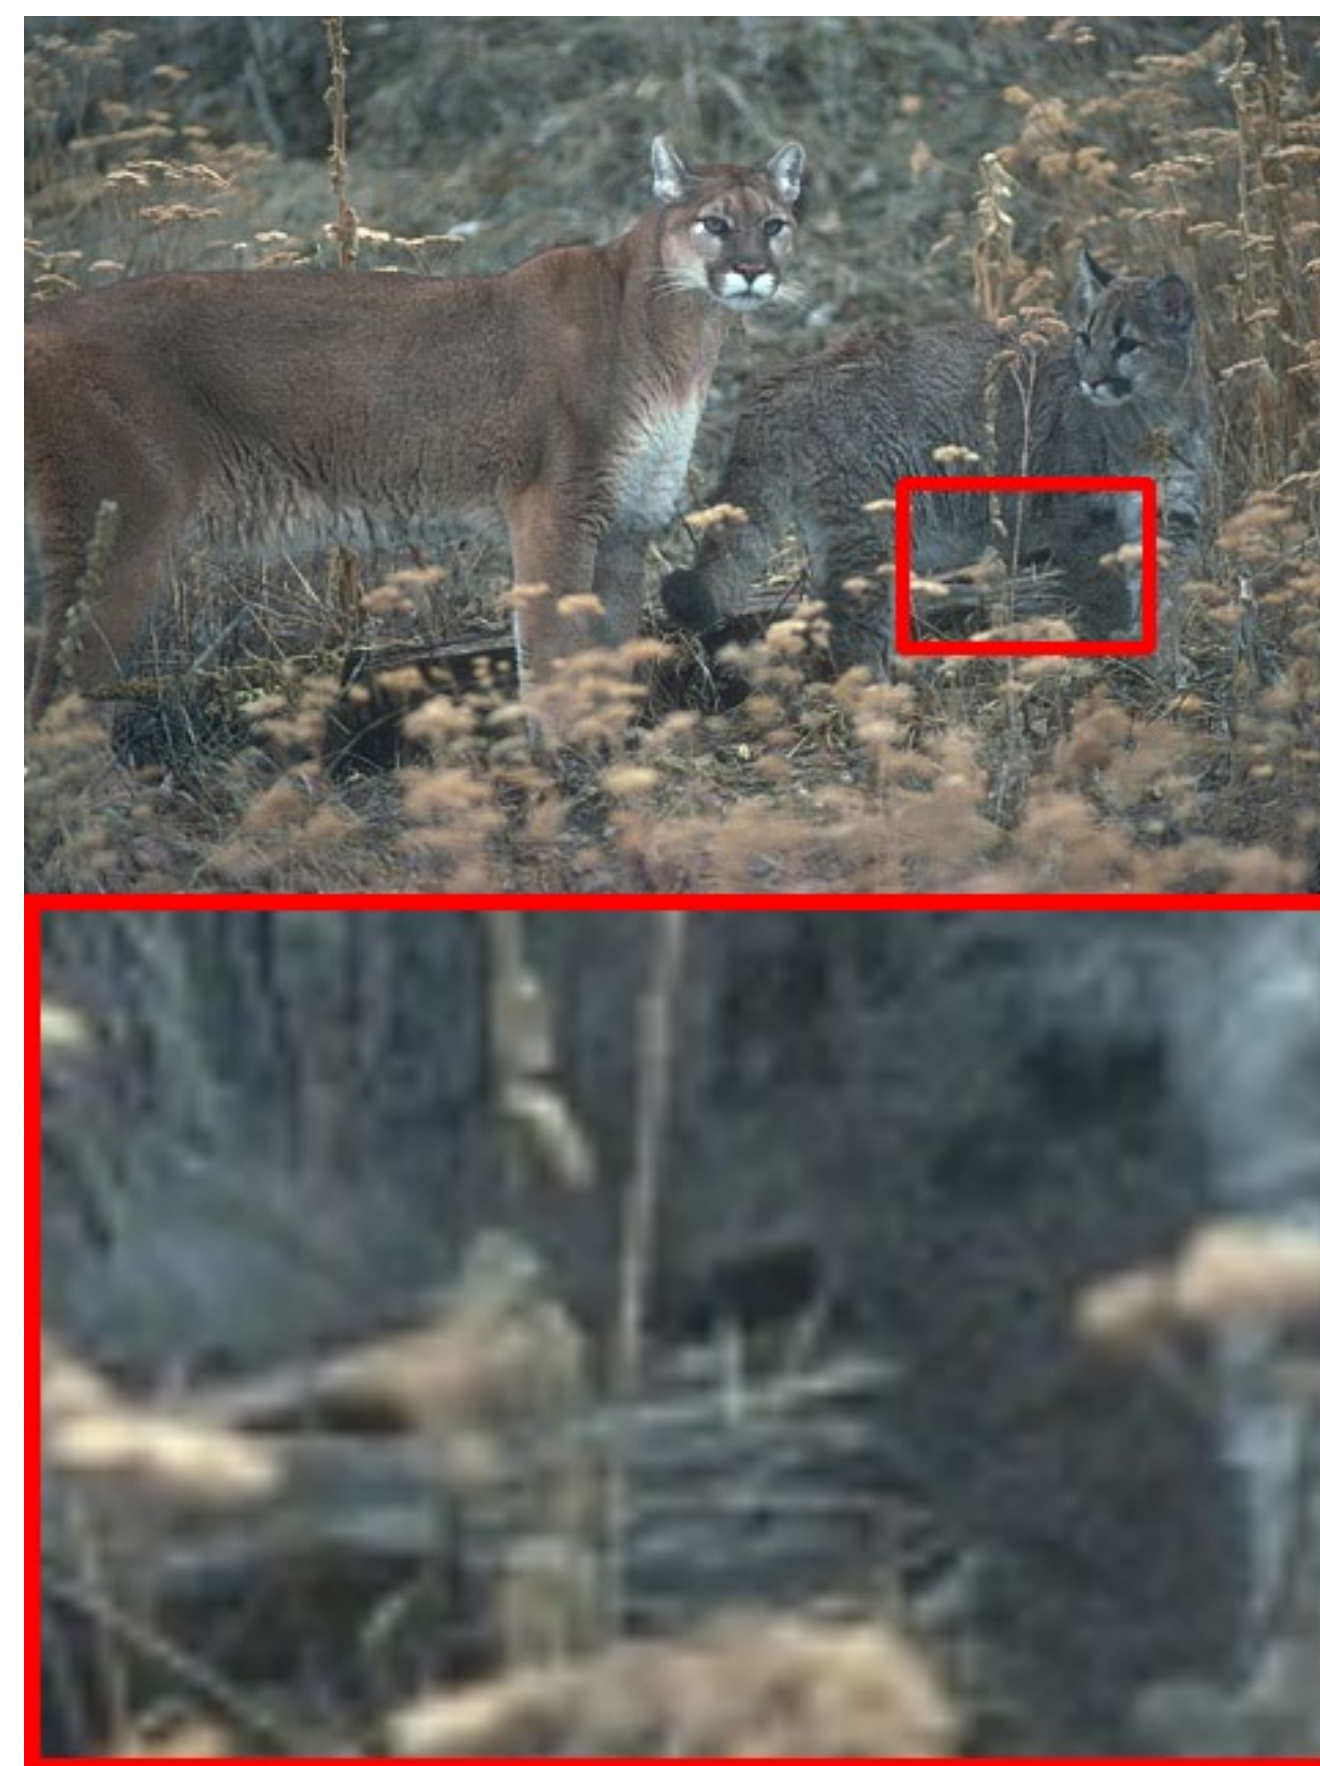

BRN

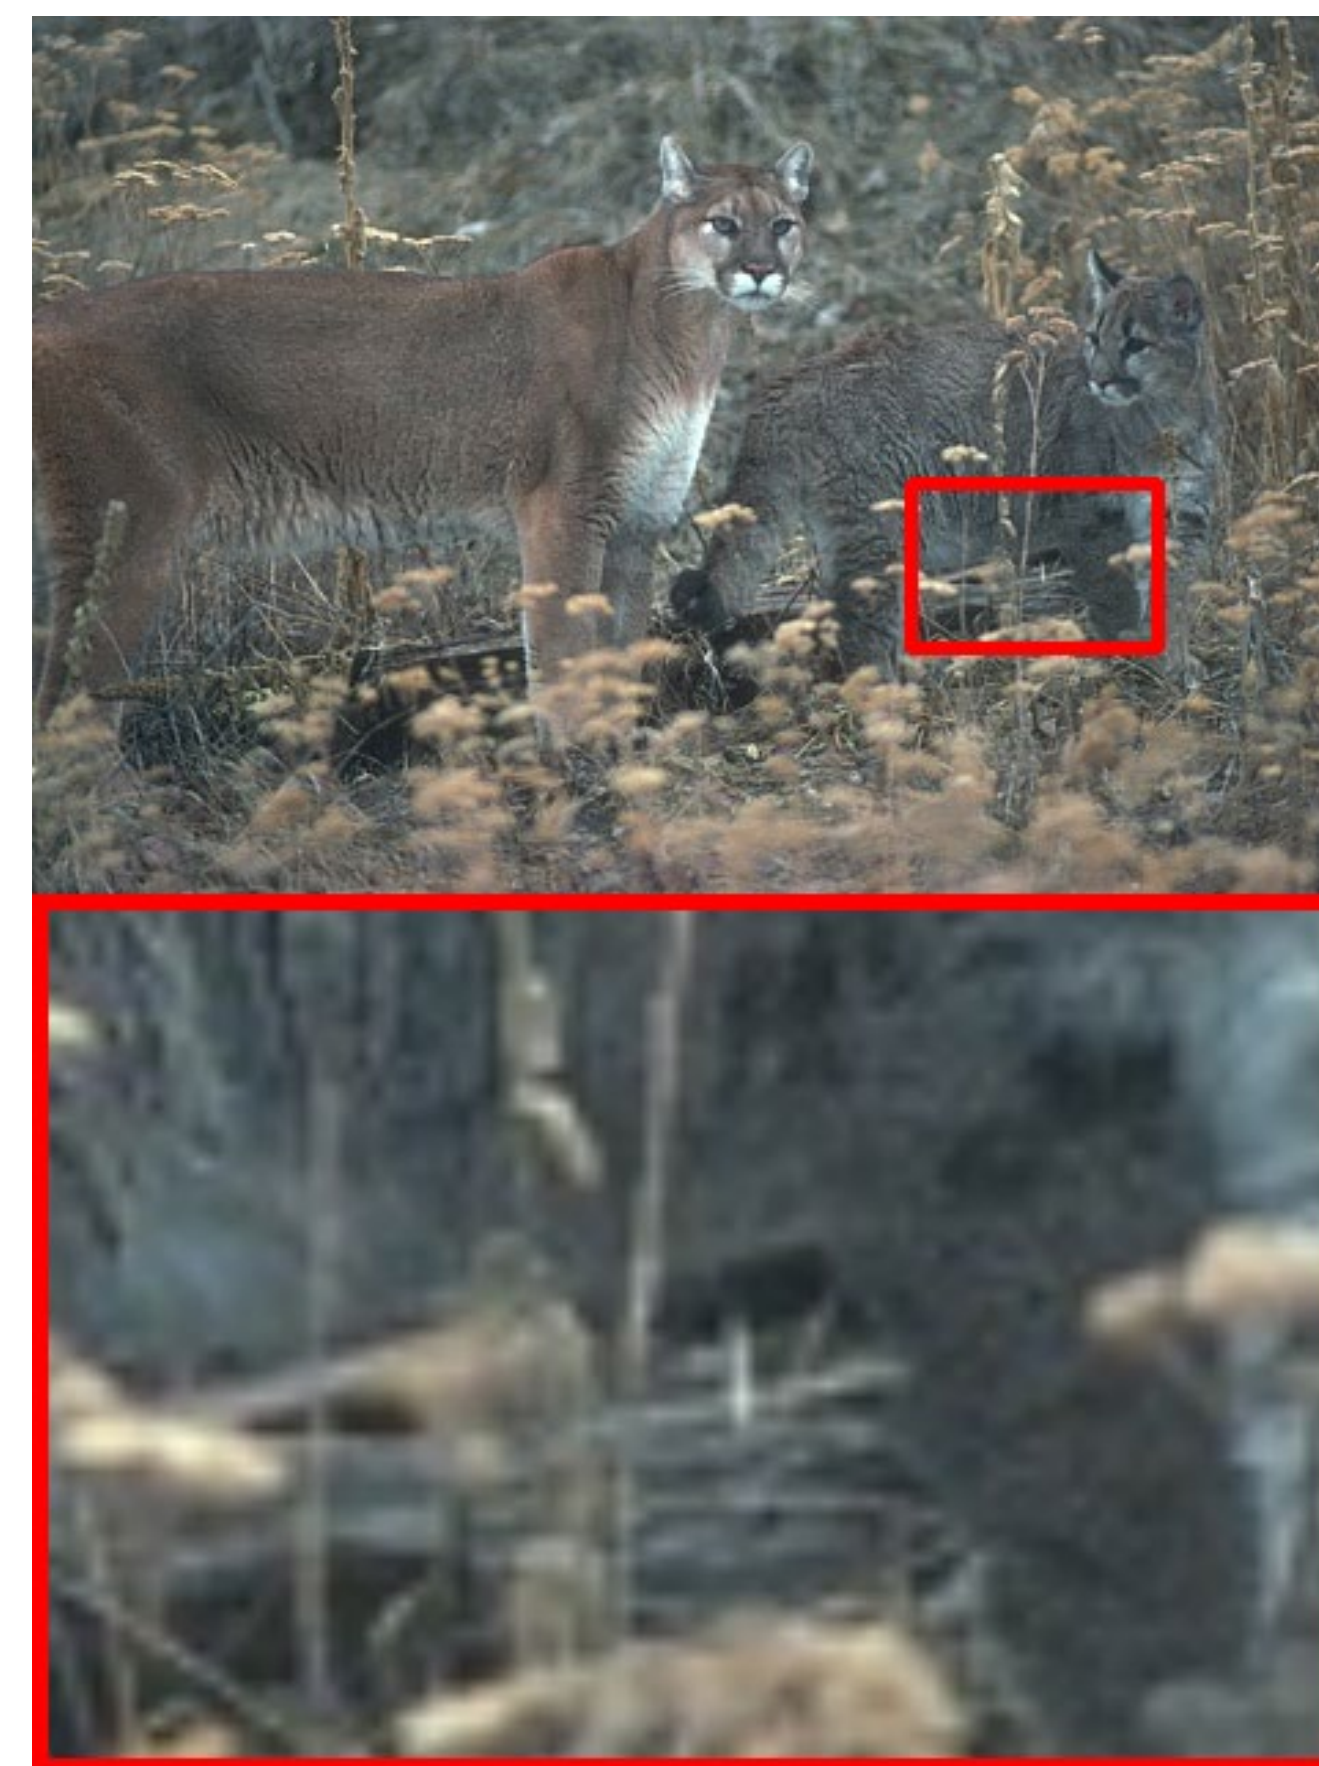

ECNet (ours)

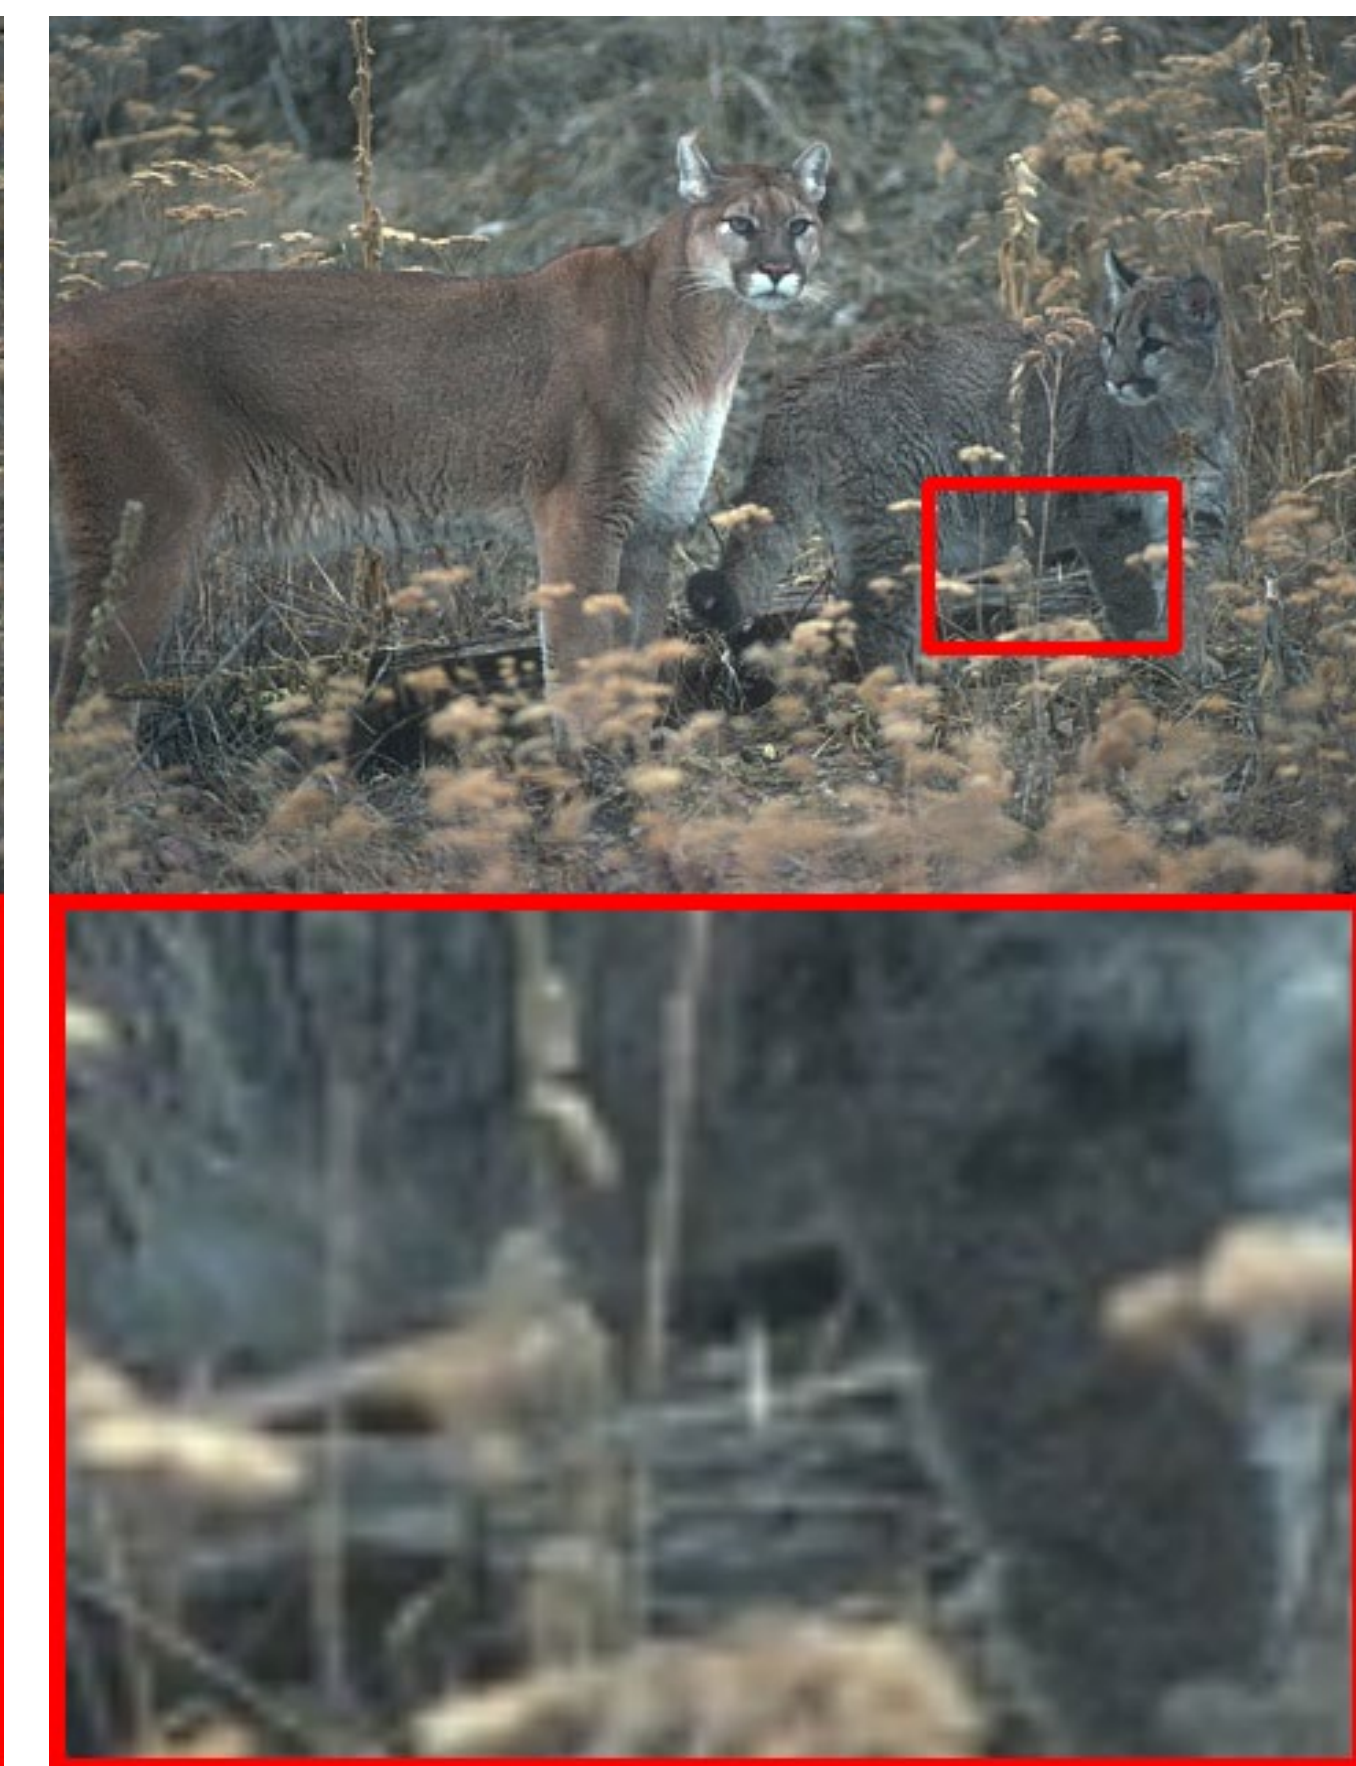

ECNet+LL (ours)



# Experimental results on Rain800

- **Dataset: Rain800 [9]**

The quantitative comparison on Rain800 dataset  
(**Red**: the best result; **Blue**: the second best result).

| Methods | SIRR<br>[2] | RESCAN<br>[3] | PReNet<br>[4] | JORDER-E<br>[5] | RCDNet<br>[6] | BRN<br>[7] | ECNet<br>(ours) | ECNet+LL<br>(ours) |
|---------|-------------|---------------|---------------|-----------------|---------------|------------|-----------------|--------------------|
| PSNR    | 22.73       | 28.36         | 26.82         | 27.92           | 28.66         | 28.31      | <b>28.80</b>    | <b>29.26</b>       |
| SSIM    | 0.762       | 0.872         | 0.888         | 0.883           | 0.893         | 0.986      | <b>0.901</b>    | <b>0.905</b>       |

Note: PSNR/SSIM are calculated on Y channel

- Training pairs: 700
- Testing pairs: 100



# Qualitative comparison on Rain800

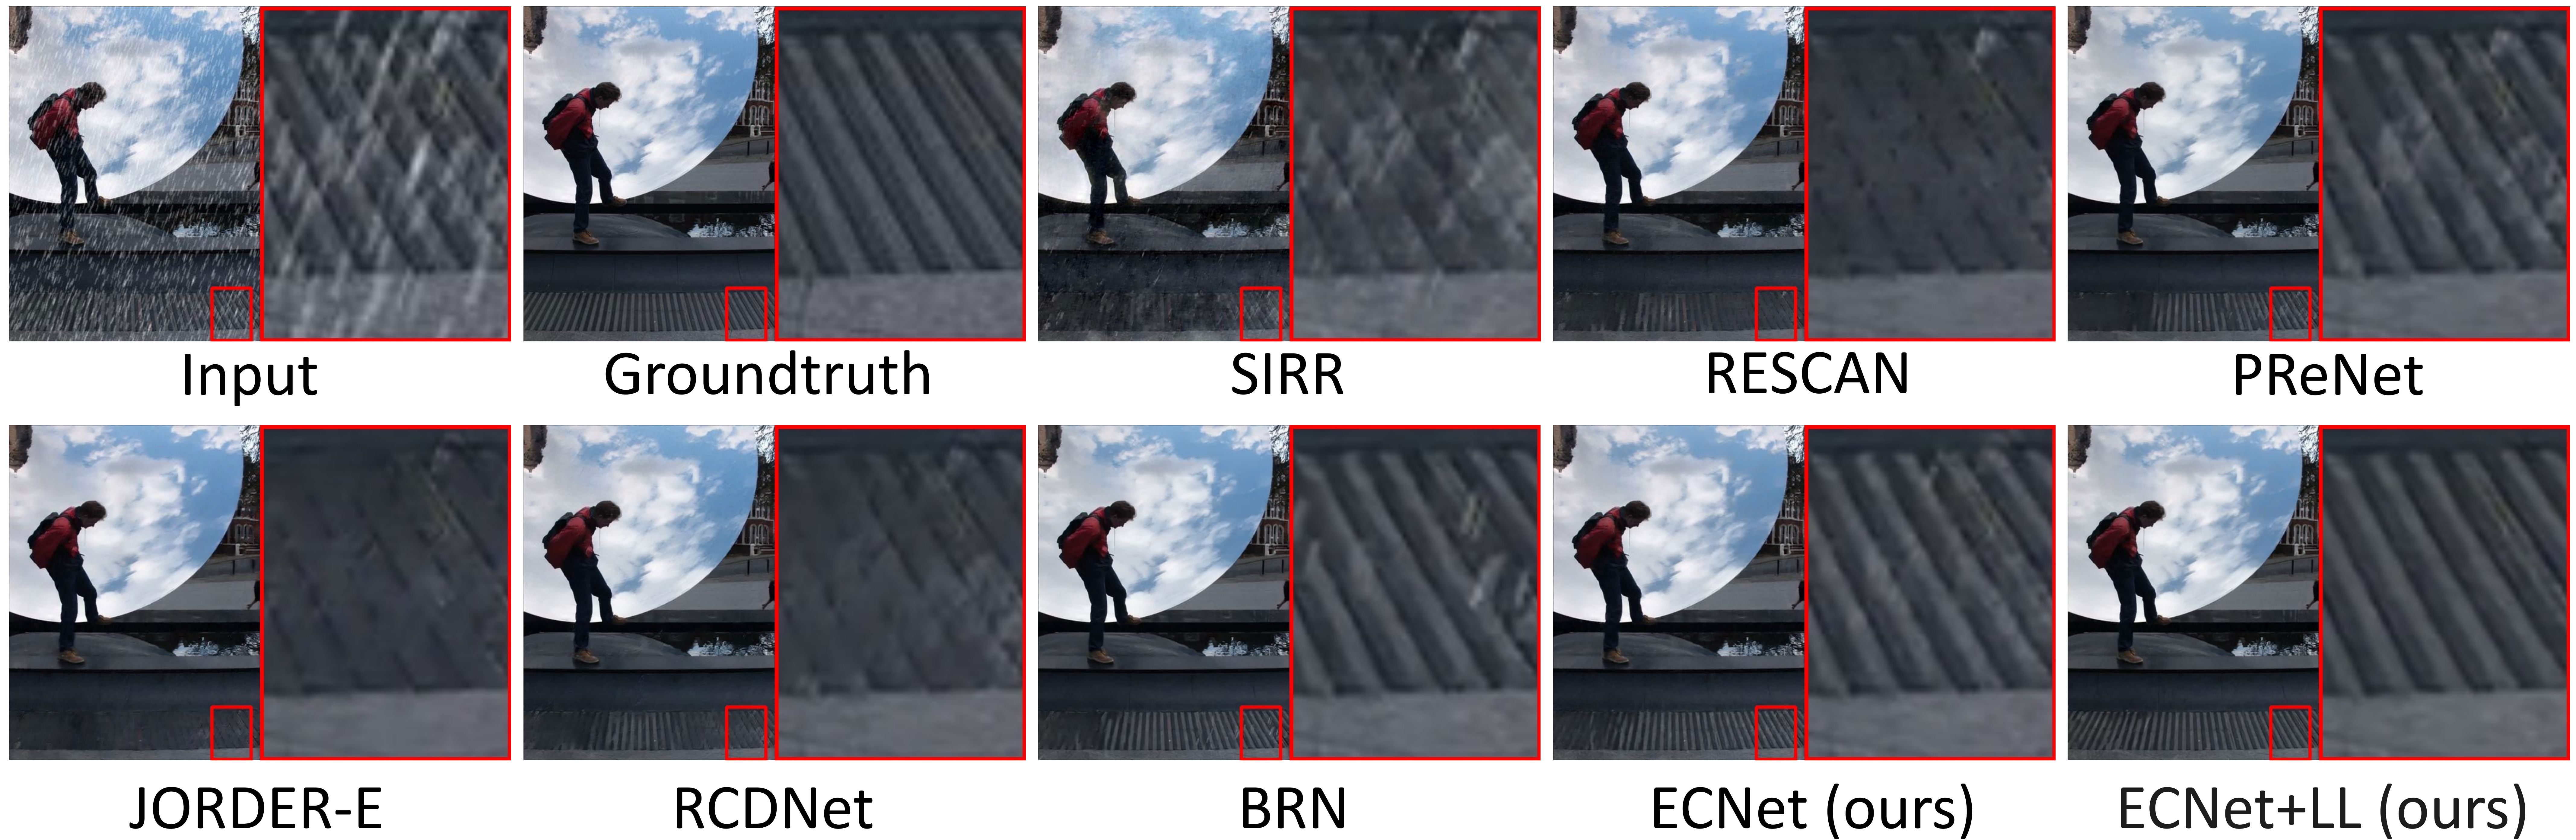



# Qualitative comparison on Rain800

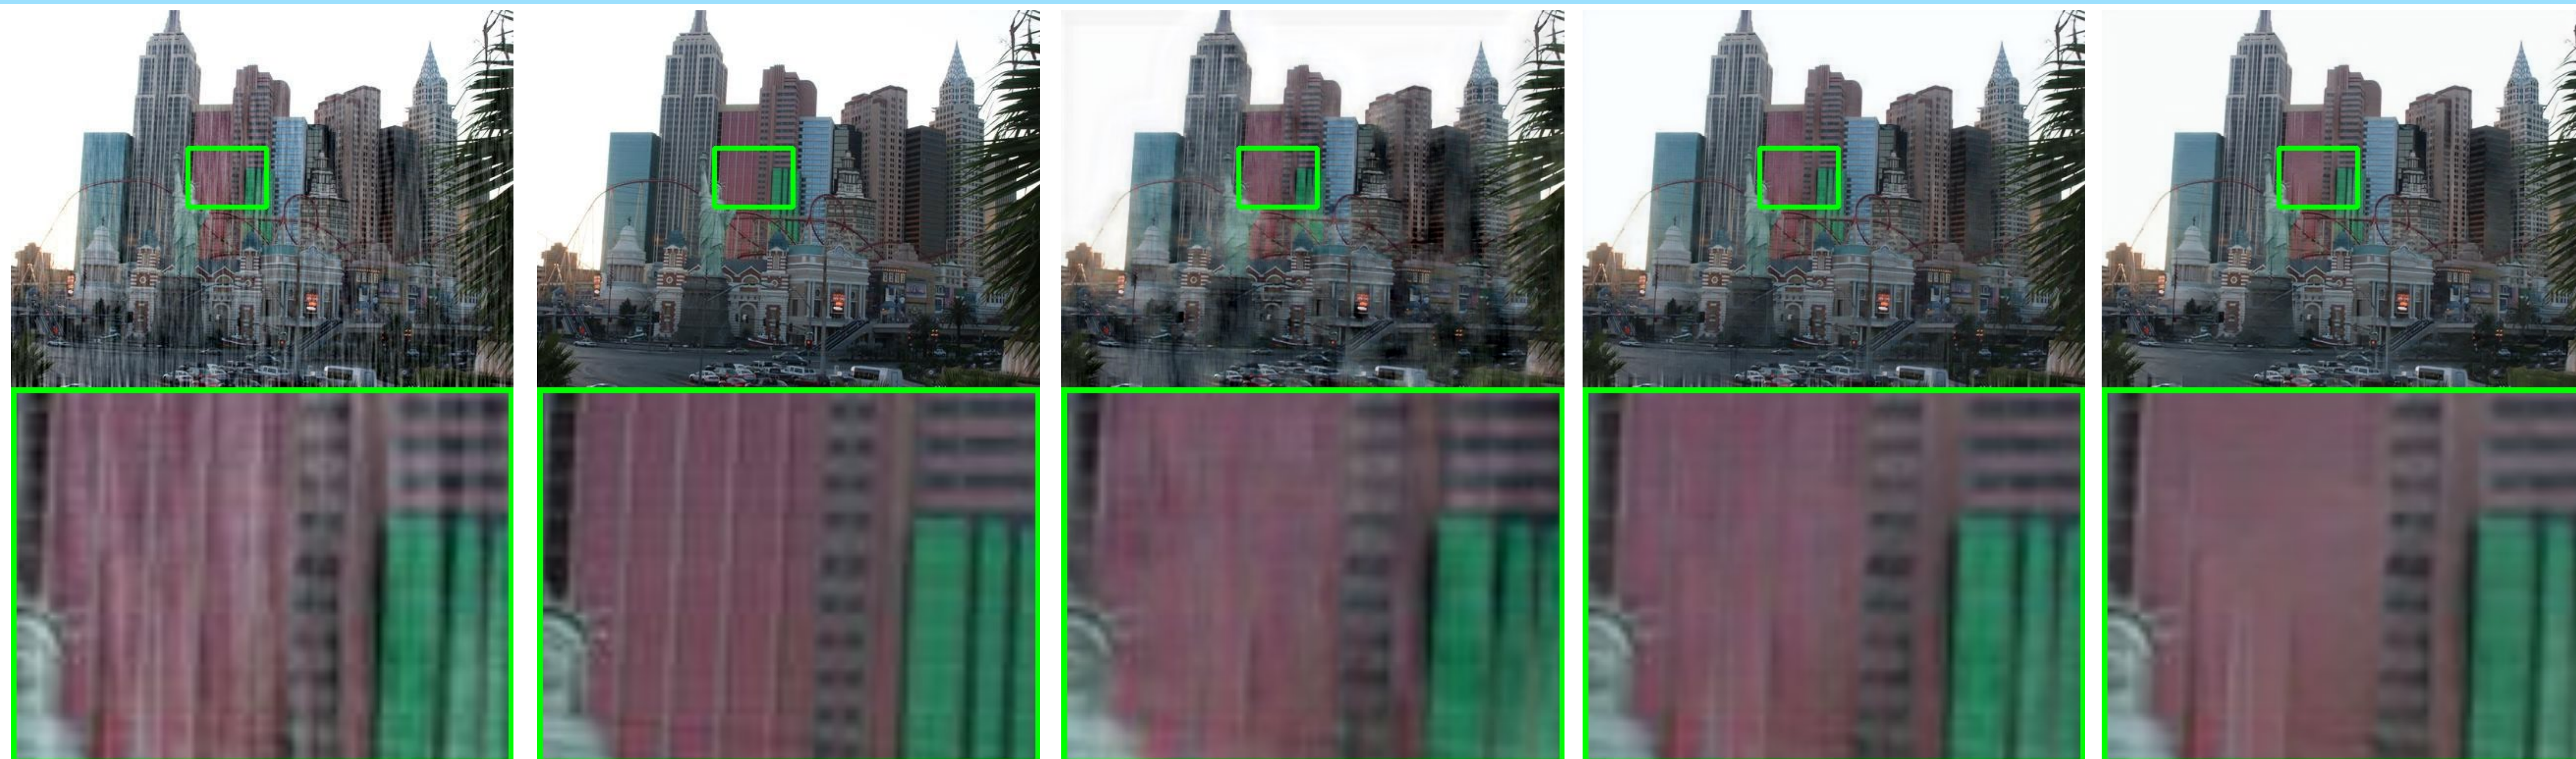

Input

Groundtruth

SIRR

RESCAN

PReNet

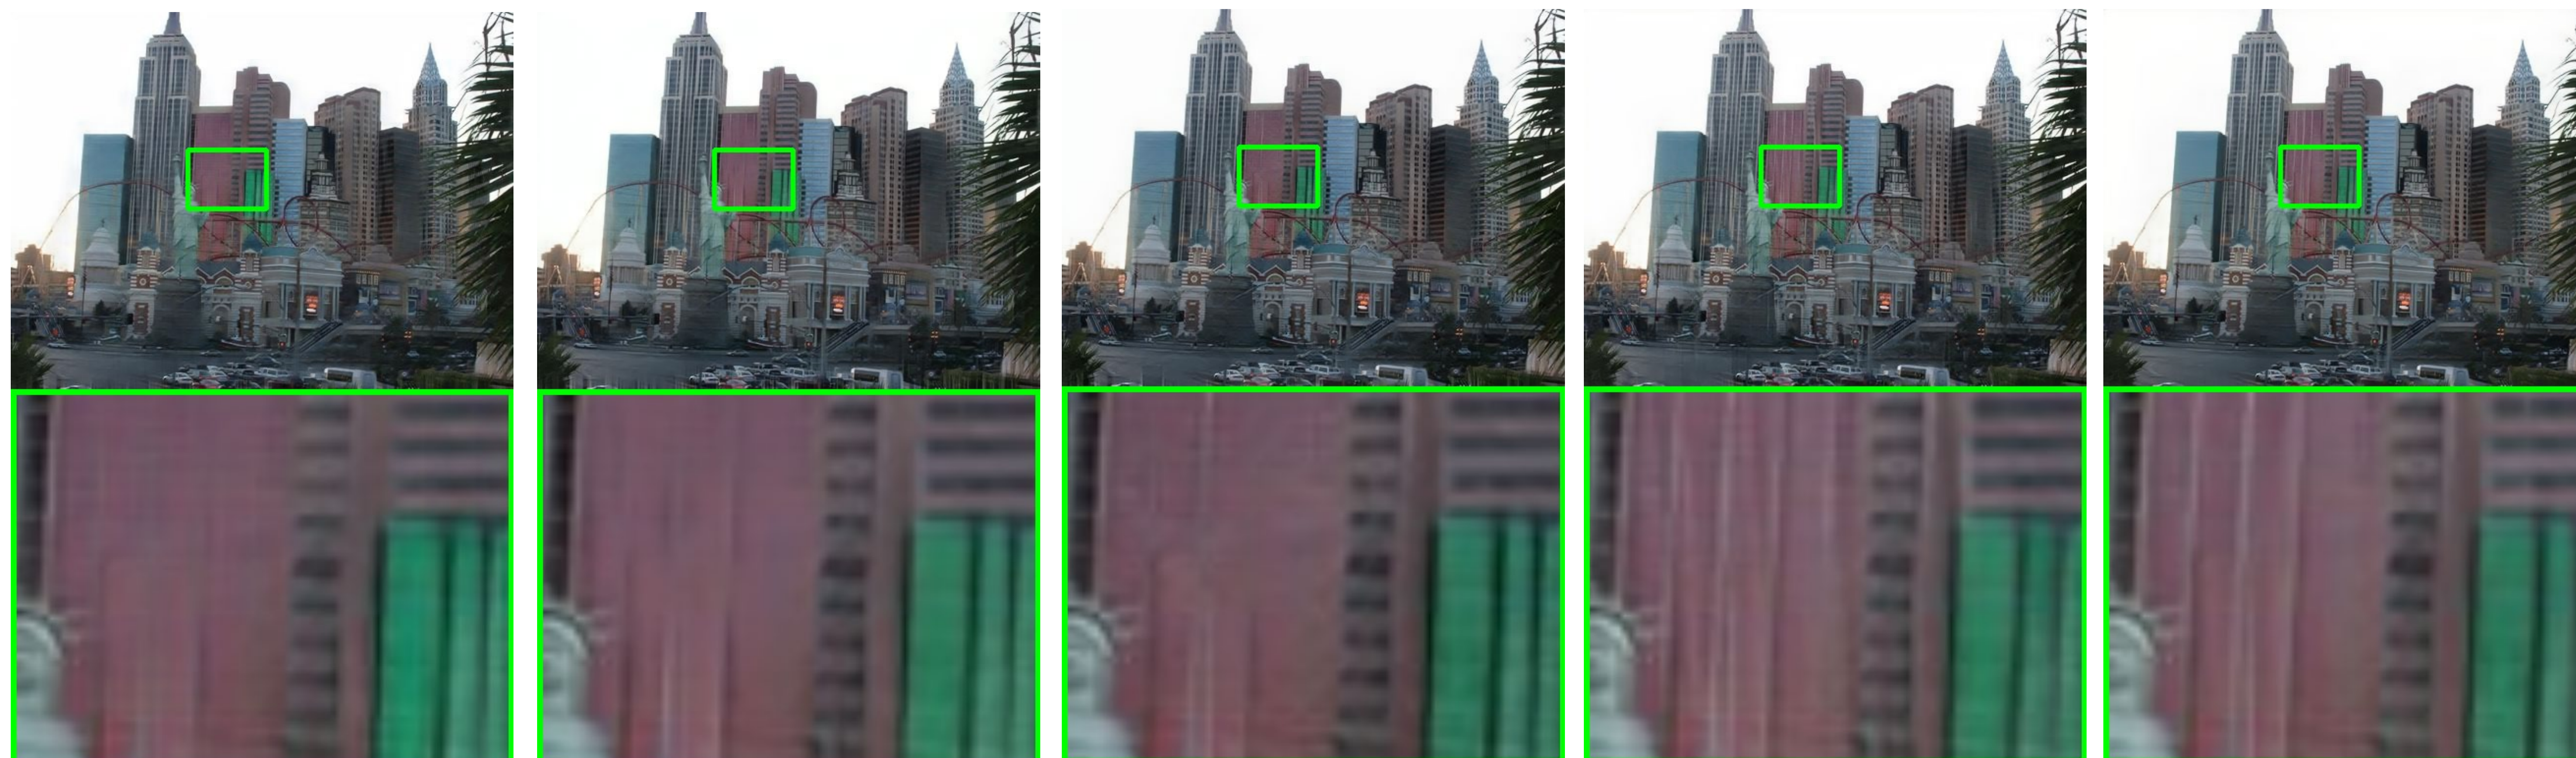

JORDER-E

RCDNet

BRN

ECNet (ours)

ECNet+LL (ours)



# References

- [1] Wei Wei, Deyu Meng, Qian Zhao, Zongben Xu, and Ying Wu. Semi-supervised transfer learning for image rain removal. In Proc. of IEEE Conf. on Computer Vision and Pattern Recognition (CVPR), pages 3877–3886, 2019.
- [2] Xia Li, JianlongWu, Zhouchen Lin, Hong Liu, and Hongbin Zha. Recurrent squeeze-and-excitation context aggregation net for single image deraining. In Proc. of European Conf. on Computer Vision (ECCV), pages 254–269, 2018.
- [3] Dongwei Ren, Wangmeng Zuo, Qinghua Hu, Pengfei Zhu, and Deyu Meng. Progressive image deraining networks: A better and simpler baseline. In Proc. of IEEE Conf. on Computer Vision and Pattern Recognition (CVPR), pages 3937–3946, 2019.
- [4] Wenhan Yang, Robby T Tan, Jiashi Feng, Zongming Guo, Shuicheng Yan, and Jiaying Liu. Joint rain detection and removal from a single image with contextualized deep networks. IEEE Trans. on Pattern Analysis and Machine Intelligence, 42(6):1377–1393, 2019.
- [5] Hong Wang, Qi Xie, Qian Zhao, and Deyu Meng. A model-driven deep neural network for single image rain removal. In Proc. of IEEE Conf. on Computer Vision and Pattern Recognition (CVPR), pages 3103–3112, 2020.
- [6] Dongwei Ren, Wei Shang, Pengfei Zhu, Qinghua Hu, Deyu Meng, and Wangmeng Zuo. Single image deraining using bilateral recurrent network. IEEE Trans. on Image Processing, 29:6852–6863, 2020.
- [7] Wenhan Yang, Robby T Tan, Jiashi Feng, Jiaying Liu, Zongming Guo, and Shuicheng Yan. Deep joint rain detection and removal from a single image. In Proc. of IEEE Conf. on Computer Vision and Pattern Recognition (CVPR), pages 1357–1366, 2017.
- [8] Tianyu Wang, Xin Yang, Ke Xu, Shaozhe Chen, Qiang Zhang, and Rynson WH Lau. Spatial attentive single-image deraining with a high quality real rain dataset. In Proc. of IEEE Conf. on Computer Vision and Pattern Recognition (CVPR), pages 12270–12279, 2019.
- [9] Zhang, He, Vishwanath Sindagi, and Vishal M. Patel. "Image de-raining using a conditional generative adversarial network." IEEE transactions on circuits and systems for video technology 30.11 (2019): 3943-3956.
